# Supplementary material for: Chimeric origins of ochrophytes and haptophytes revealed through an ancient plastid proteome
Source: eLife journal article supplement (doi:10.7554/elife.23717), 2017-05-12
Supplement: figures [file elife-23717-figures-v2.pdf]

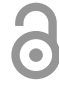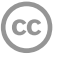

---

## Figures and figure supplements

Chimeric origins of ochrophytes and haptophytes revealed through an ancient plastid proteome

**Richard G Dorrell *et al***

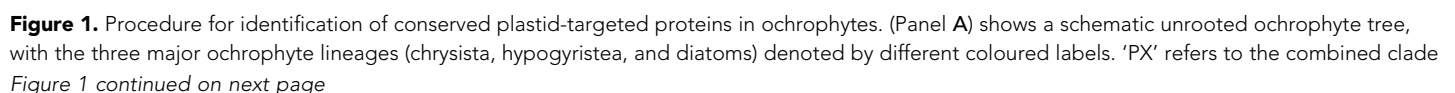

## Figure 1 continued

of phaeophytes, xanthophytes and related taxa, and 'PESC' to pinguiphytes, eustigmatophytes, synchromophytes, chrysophytes and relatives. A global overview of the eukaryotic tree of life, including the position of ochrophytes relative to other lineages is shown in **Figure 1—figure supplement 1**. (Panel **B**) shows the number of inferred positive control HPPGs (i.e., HPPGs encoding proteins with experimentally confirmed plastid localisation, or unambiguously plastid function) and negative control HPPGs (i.e., HPPGs encoding proteins with no obvious plastid-targeted orthologues encoded in ochrophyte genomes, but found in haptophyte and cryptomonad genomes) detected as plastid-targeted in different numbers of ochrophyte lineages using ASAFind (i) and HECTAR (ii). The blue bars show the number of positive controls identified to pass a specific conservation threshold, plotted against the left hand vertical axis of the graph, while the red bars show the number of negative controls that pass the same conservation threshold, plotted against the right hand vertical axis of the graph. The number of different sub-categories included in each conservation threshold is shown in a heatmap below the two graphs, with the specific distribution for each bar in the graph shown in the aligned cells directly beneath it. Each shaded cell corresponds to an identified orthologue in one sub-category of a particular ochrophyte lineage: orange cells indicate presence of chrysistan sub-categories; light brown cells the presence of hypogyrystean sub-categories; and dark brown cells the presence of diatom sub-categories. In each graph, black arrows label the conservation thresholds inferred to give the strongest separation (as inferred by chi-squared P-value) between positive and negative control sequences. The table (iii) tabulates the three conservation patterns identified as appropriate for distinguishing probable ancestral HPPGs from false positives. (Panel **C**) shows the complete HPPG assembly, alignment and phylogenetic pathway used to identify conserved plastid-targeted proteins. (Panel **D**) tabulates the number of HPPGs built using ASAFind and HECTAR predictions, and the number of non-redundant HPPGs identified in the final dataset. The final total represents the pooled total of non-redundant HPPGs identified with both ASAFind and HECTAR.

DOI: [10.7554/eLife.23717.003](https://doi.org/10.7554/eLife.23717.003)

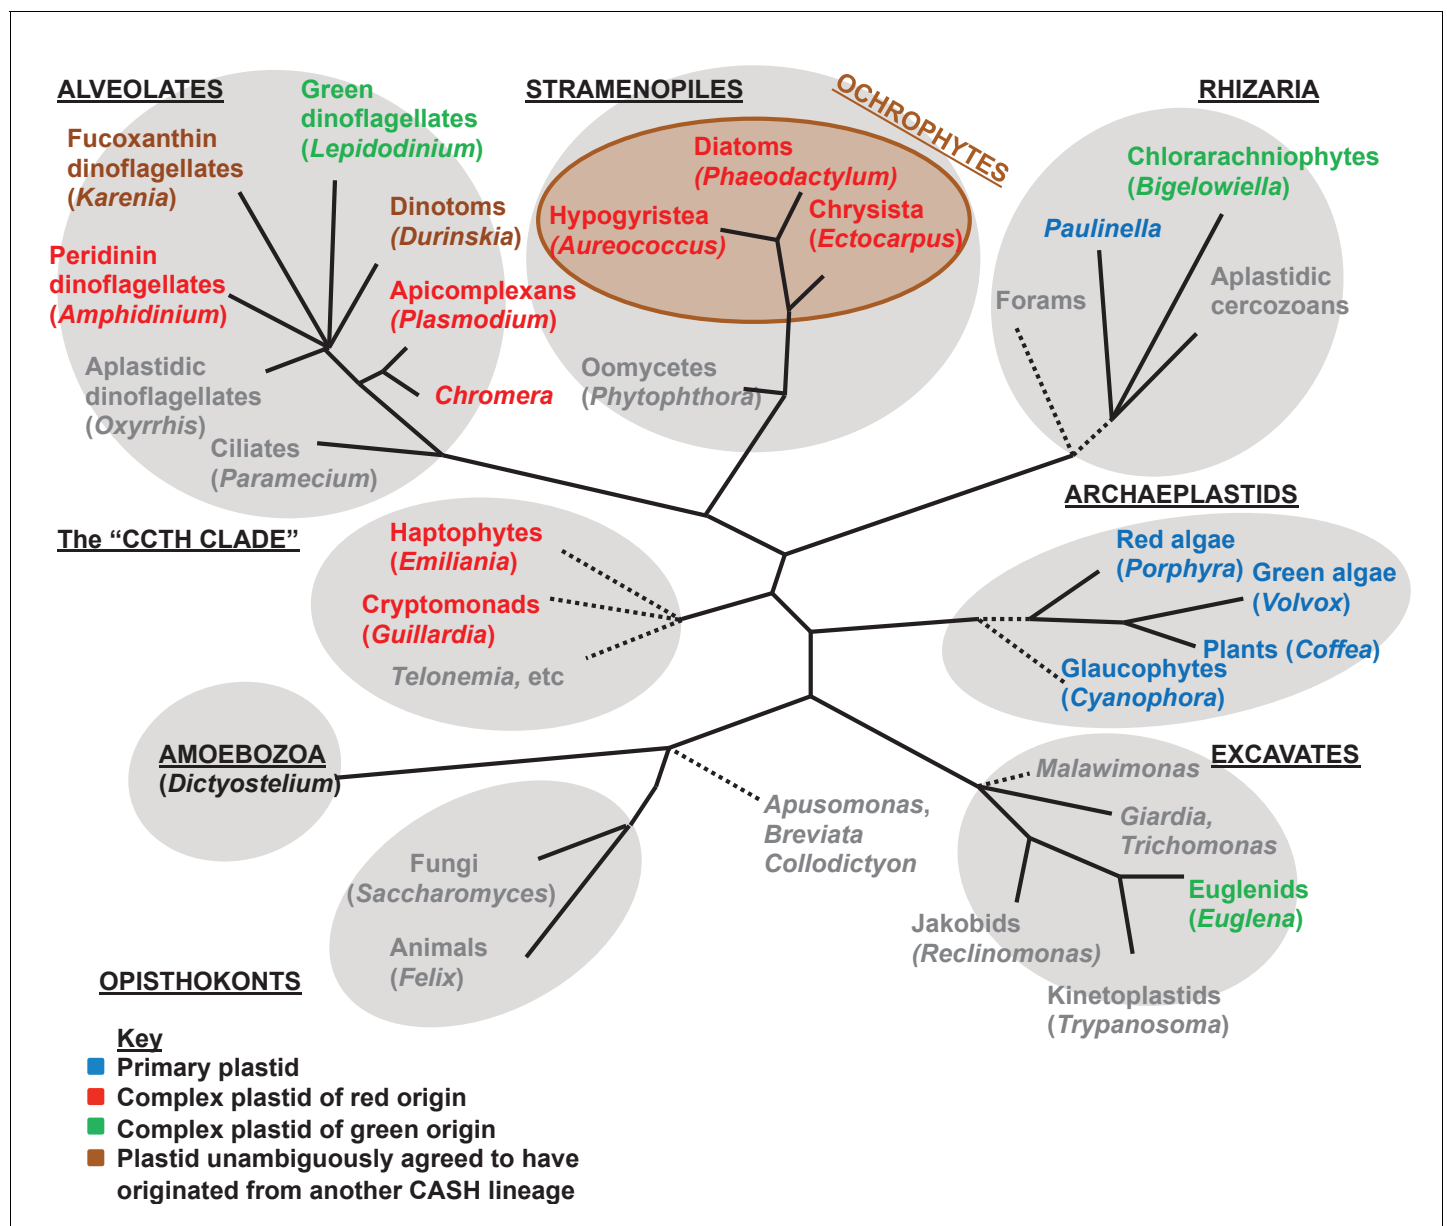

**Figure 1—figure supplement 1.** Overview of eukaryotic diversity. This figure, adapted from a previous review (Dorrell and Howe, 2012a), profiles the diversity of different eukaryotic nuclear lineages. Each grey ellipse corresponds to one major clade, or 'supergroup' of eukaryotes. A brown ellipse within the stramenopile clade delineates the ochrophyte lineages. Dashed lines denote uncertain taxonomic relationships. For each taxon, a type species (defined either by the presence of a complete genome, extensive transcriptome library, or of particular anthropic significance) is given in brackets. Taxa that lack plastids are labelled in grey, and taxa with plastids are shaded according to the evolutionary origin of that plastid lineage.

DOI: [10.7554/eLife.23717.004](https://doi.org/10.7554/eLife.23717.004)



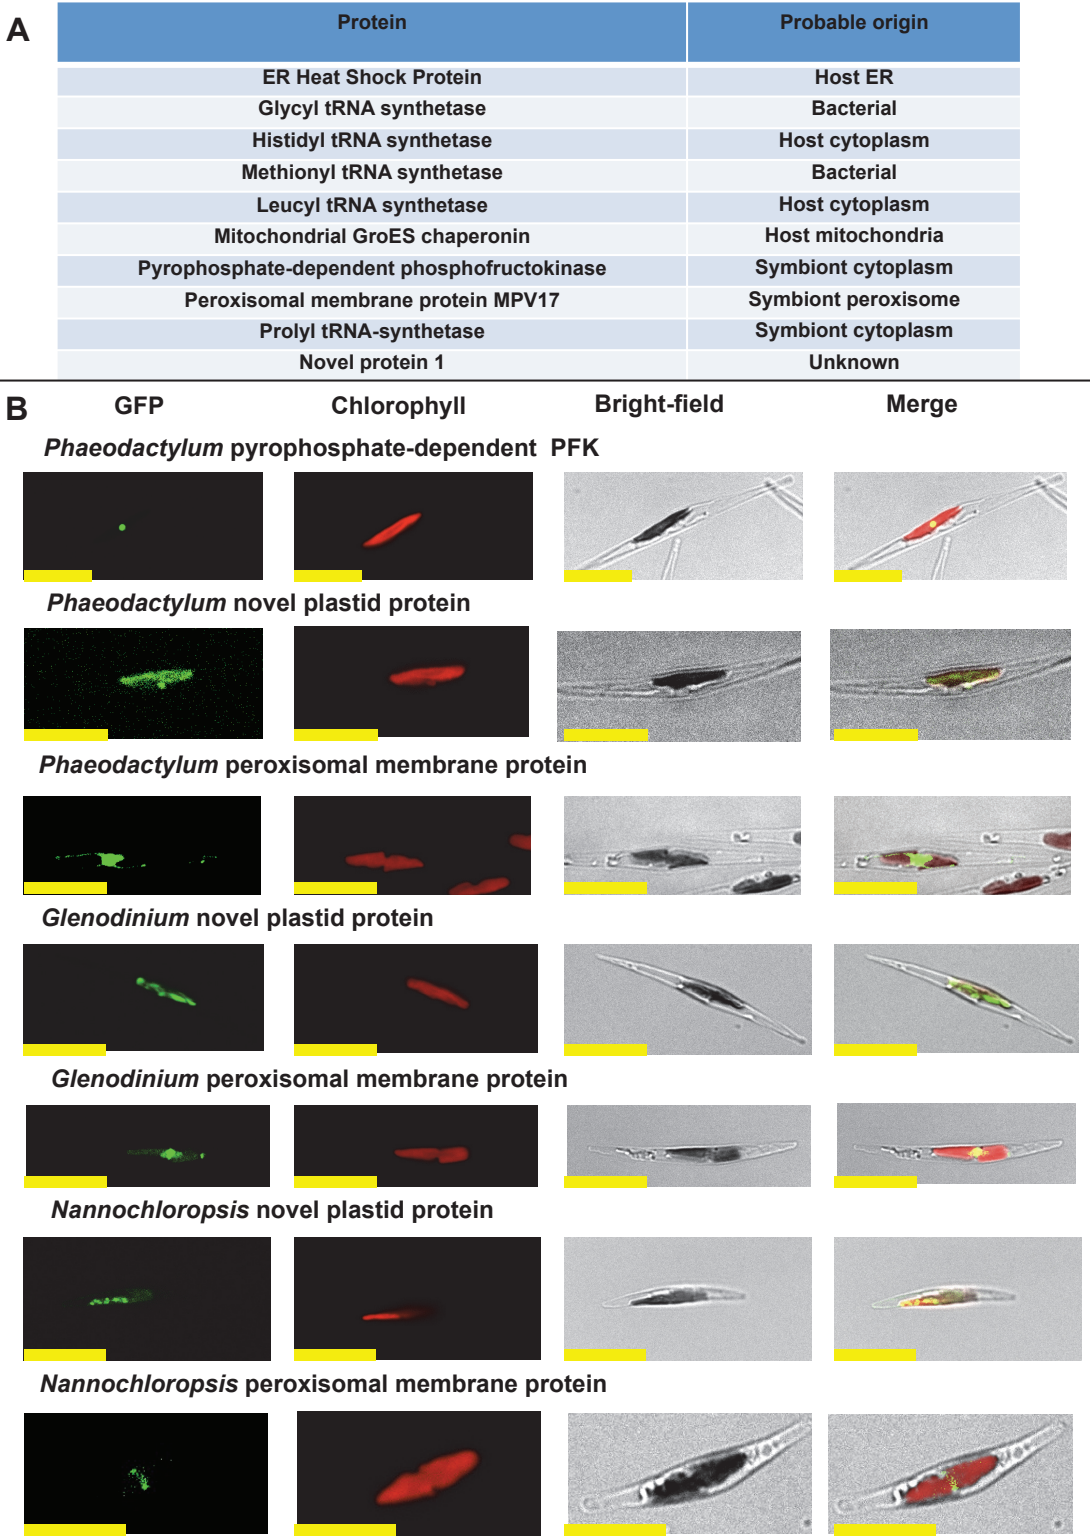

**Figure 2.** Verification of unusual ancestral plastid-targeted proteins. (Panel A) lists the ten proteins selected for experimental characterisation and their most probable previous localisation prior to their establishment in the ochrophyte plastid, based on the first 50 nr BLAST hits. Exemplar alignments and Figure 2 continued on next page

## Figure 2 continued

single-gene tree topologies for some of these proteins are shown in **Figure 2—figure supplements 1–4**. (Panel **B**) shows the localisation of GFP constructs for copies of two proteins with an unambiguous plastid localisation (a pyrophosphate-dependent PFK, which localises to the pyrenoid, and a novel plastid protein, with cosmopolitan distribution across the plastid) and one protein with a periplastid localisation (a predicted peroxisomal membrane protein) from the diatom *Phaeodactylum tricornutum*, the diatom endosymbiont of the dinoflagellate *Glenodinium foliaceum* and the eustigmatophyte *Nannochloropsis gaditana*, expressed in *P. tricornutum*. All scale bars = 10  $\mu\text{m}$ . Expression constructs for seven additional *P. tricornutum* proteins and three additional *N. gaditana* proteins with multipartite plastid localisations are shown in **Figure 2—figure supplements 5 and 6**, and control images (wild-type cells, and cells expressing untargeted eGFP) are shown in **Figure 2—figure supplement 7**.

DOI: [10.7554/eLife.23717.006](https://doi.org/10.7554/eLife.23717.006)

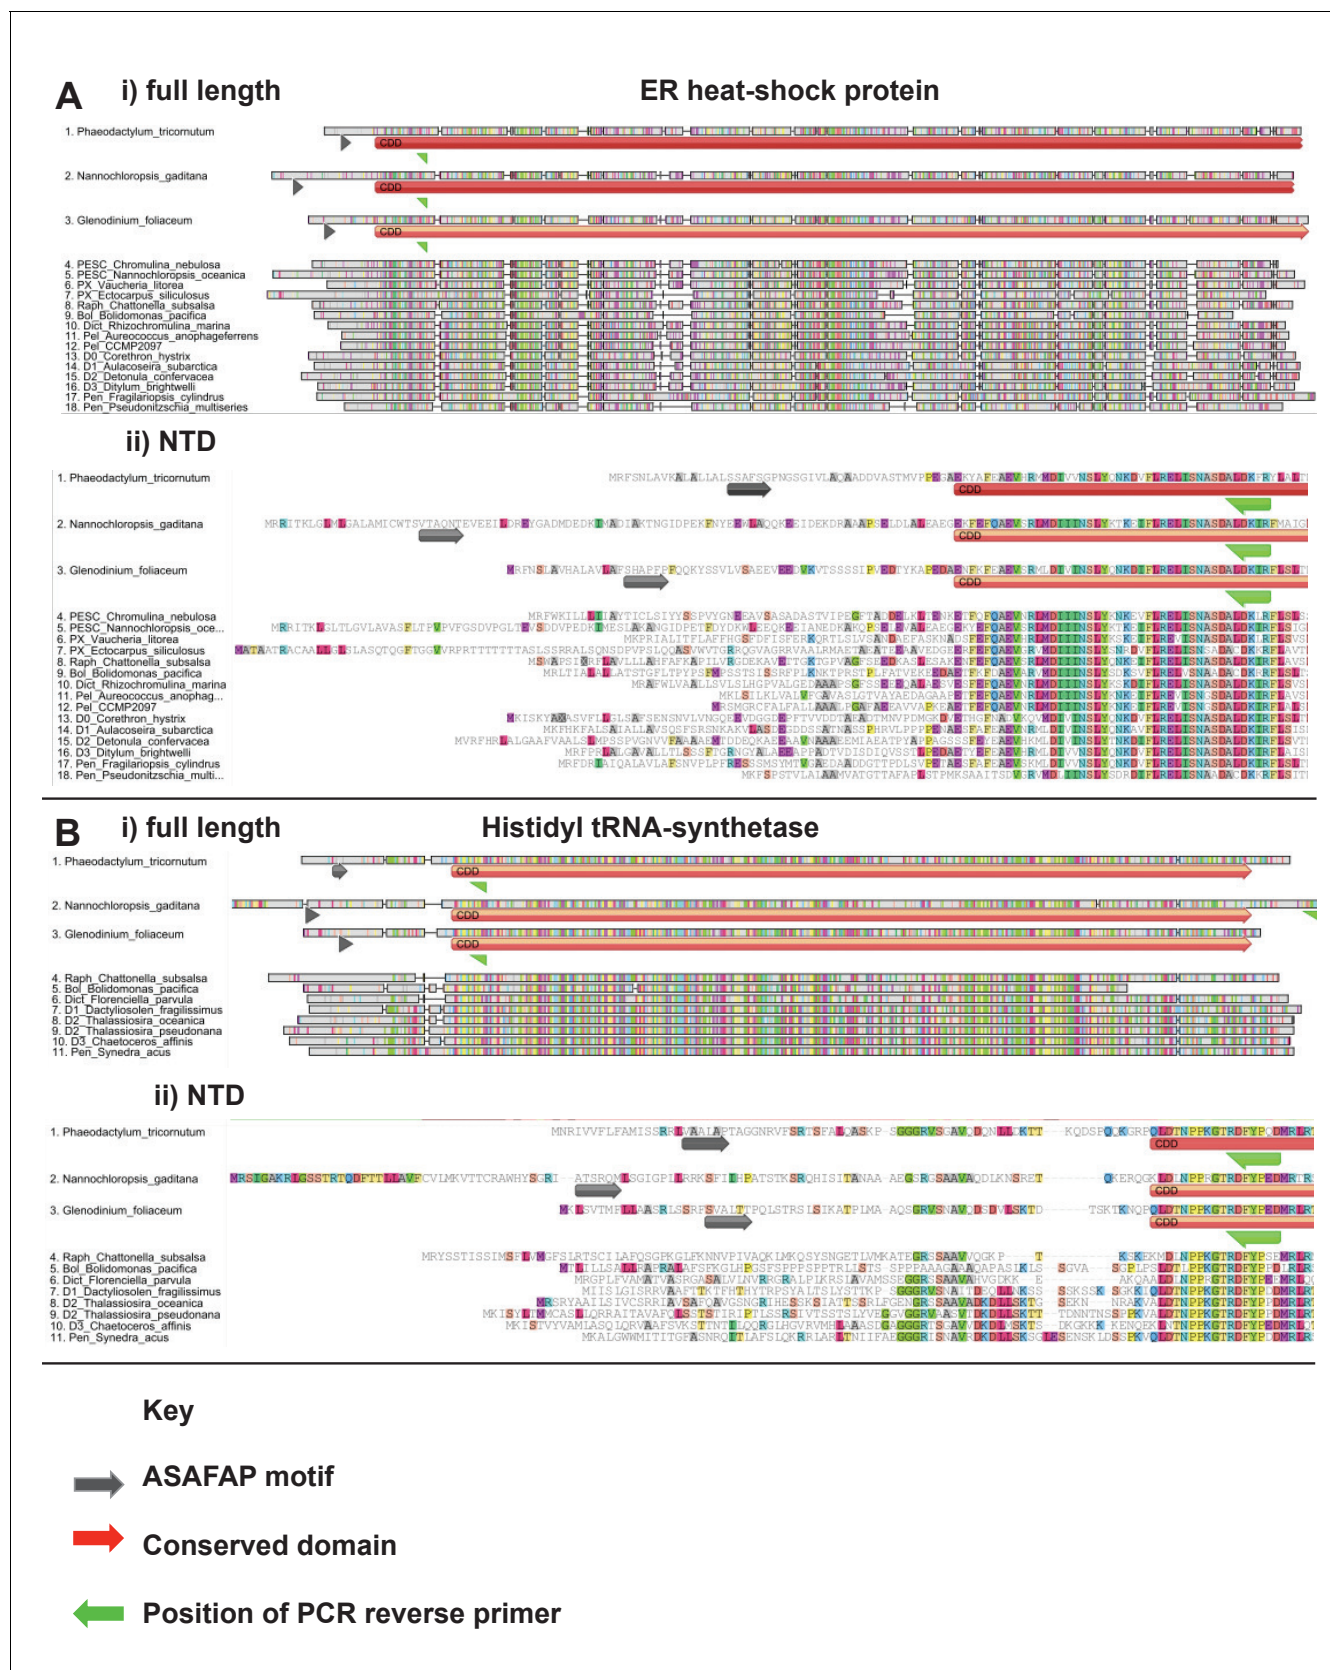

**Figure 2—figure supplement 1.** Exemplar ochrophyte plastid protein alignments. This figure shows untrimmed GeneIOUS alignments for two ancestral HPPGs of unusual provenance. In each case the full length of the protein (labelled i) and N-terminal region only (ii) are shown, demonstrating

Figure 2—figure supplement 1 continued on next page

Figure 2—figure supplement 1 continued

the broad conservation of the N-terminus position. Sequences for which exemplar targeting constructs (*Phaeodactylum tricornutum*, *Nannochloropsis gaditana*, *Glenodinium foliaceum*) were generated are shown at the top of each alignment.

DOI: [10.7554/eLife.23717.007](https://doi.org/10.7554/eLife.23717.007)

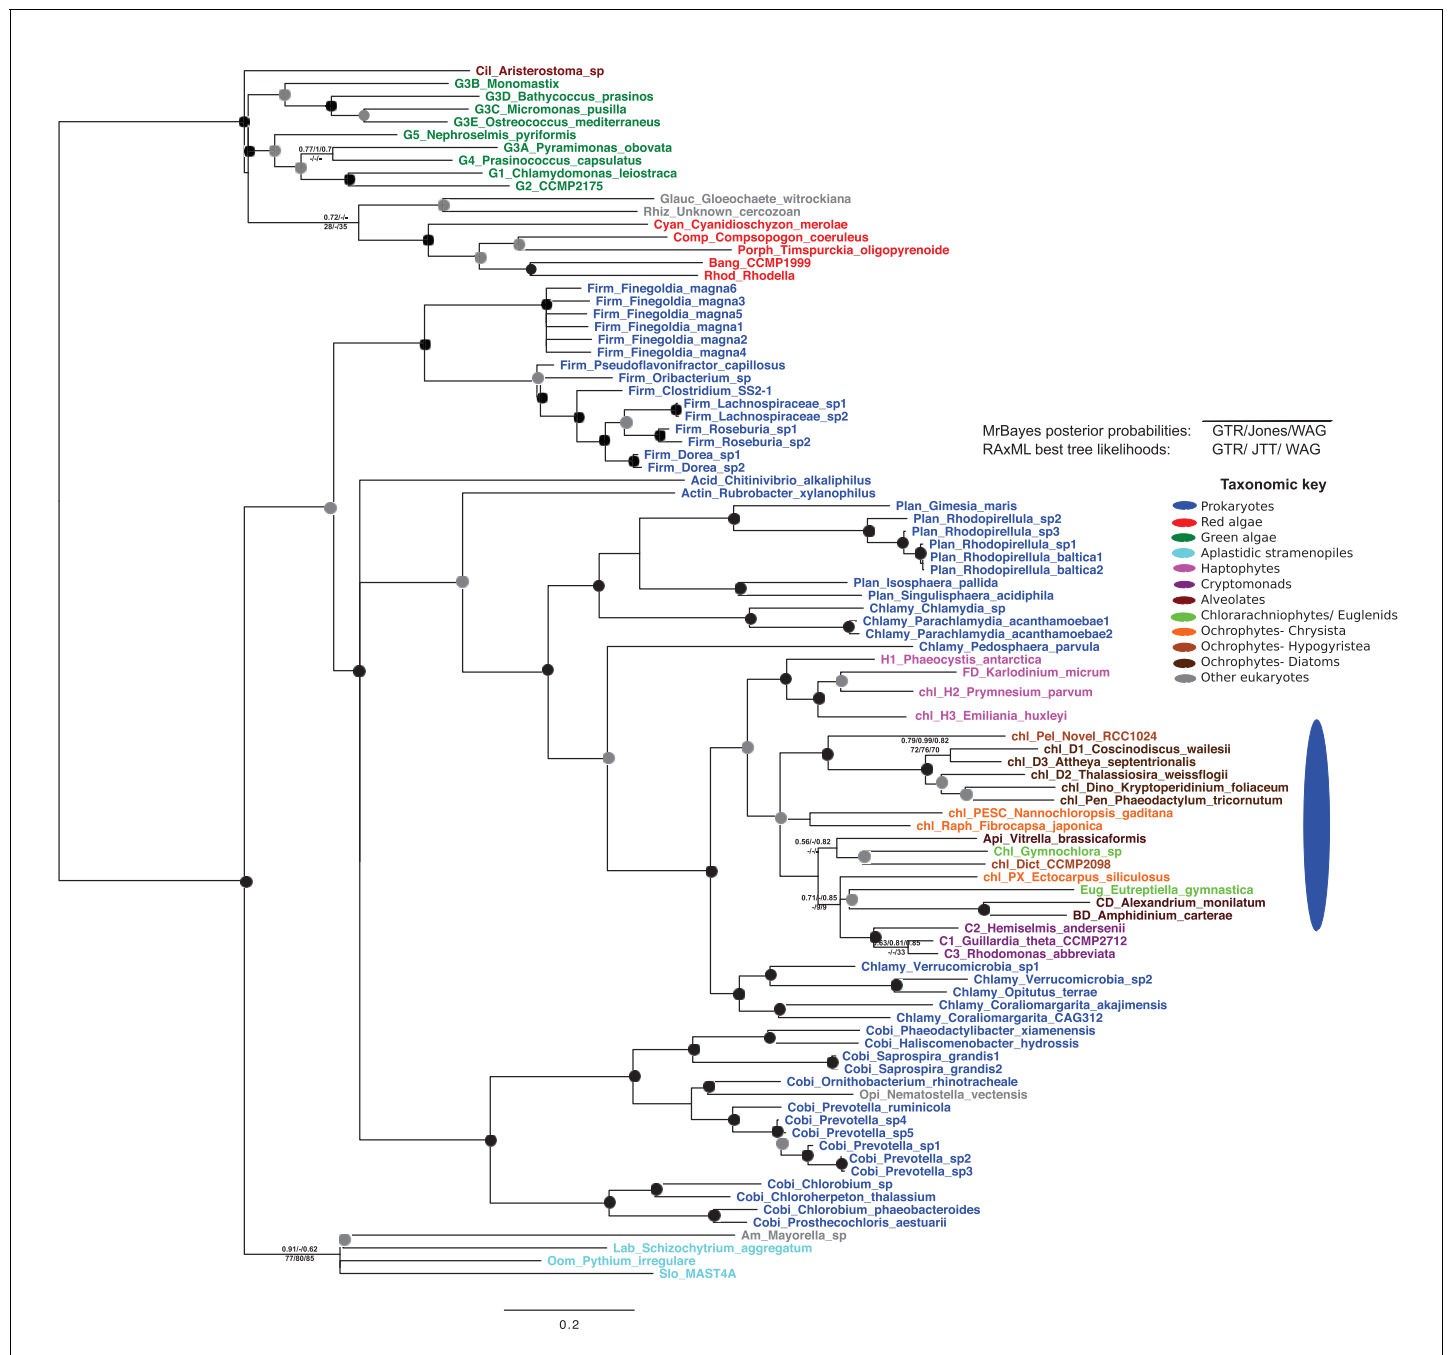

**Figure 2—figure supplement 2.** Tree of ochrophyte glycyl-tRNA synthetase sequences. This tree shows the consensus unrooted Bayesian topology for a 95 taxa x 487 aa alignment of glycyl tRNA synthetase sequences. The font colour of each sequence corresponds to the taxonomic origin (see legend below for details) and are labelled with the taxonomic identifiers previously defined in Table S1. Sequences labelled with chl\_ possess apparent plastid targeting sequences recognisable by CASH lineage plastids. The ancestral ochrophyte plastidic isoform, of apparent chlamydiobacterial origin, is labelled with a blue ellipse. Black circles at each node denote posterior probabilities of 1.0 in Bayesian inferences with three different substitution matrices (GTR, Jones, and WAG), and grey circles indicate posterior probabilities of 0.8 with at least two of these matrices. Support values for all remaining nodes, is provided using both Bayesian analysis (above line) and RAXML tree (below line), using three substitution matrices, as defined in the figure legend.

DOI: 10.7554/eLife.23717.008

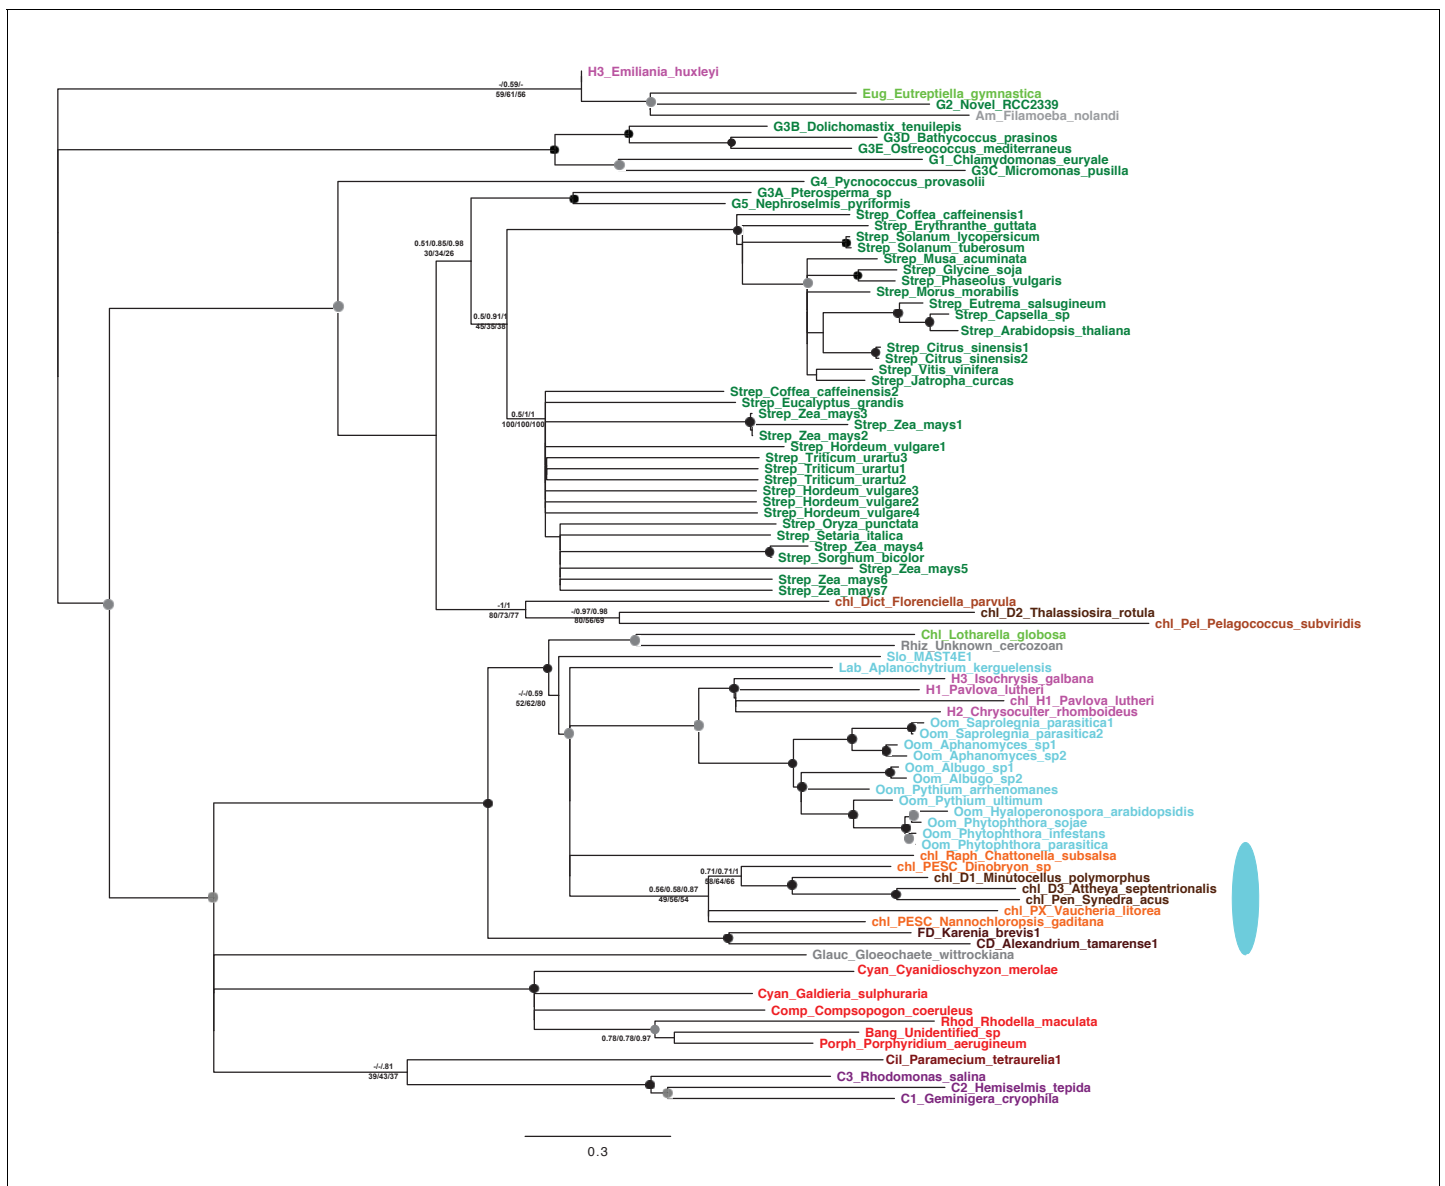

**Figure 2—figure supplement 3.** Tree of ochrophyte pyrophosphate dependent phosphofructo-1- kinase sequences. This tree shows the consensus Bayesian topology inferred for a 94 taxa x 449 aa alignment of pyrophosphate-dependent PFK, with taxa and support values shown as per **Figure 2—figure supplement 2**. The ancestral ochrophyte plastid isoform, of probable aplastidic stramenopile origin, is labelled with a cyan ellipse.

DOI: 10.7554/eLife.23717.009

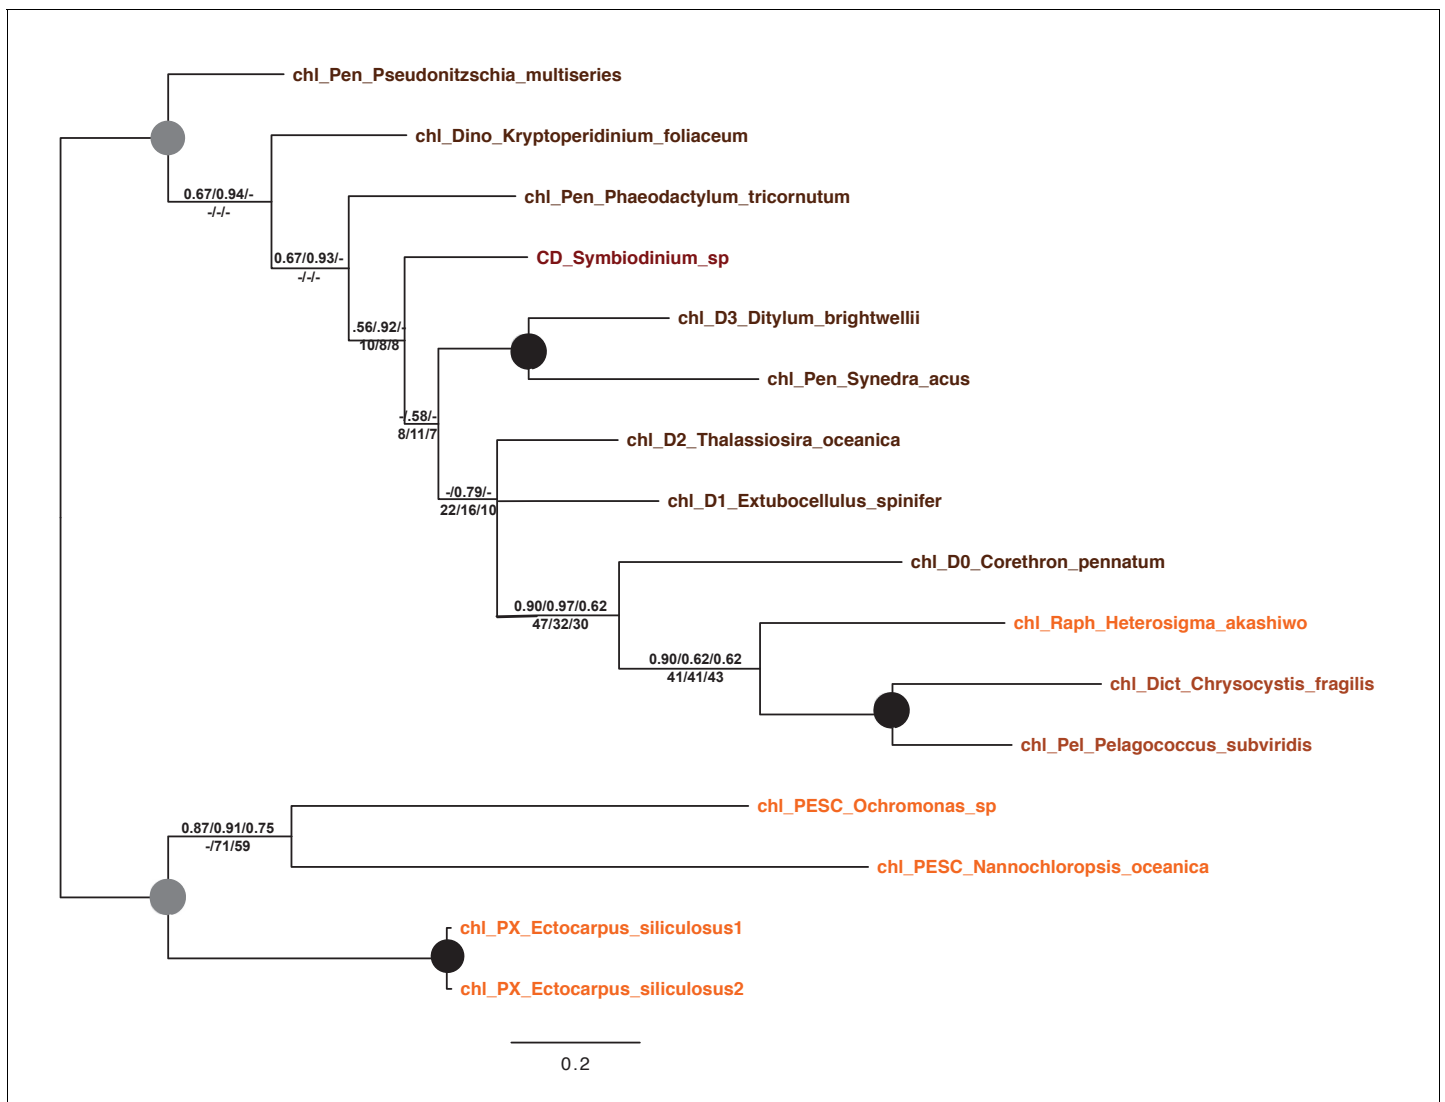

**Figure 2—figure supplement 4.** Tree of a novel ochrophyte plastid-targeted protein. This tree shows the consensus Bayesian topology inferred for a 16 taxa x 103 aa alignment of a plastid-targeted protein seemingly restricted to ochrophytes and one dinoflagellate lineage. Taxa are labelled and support values are shown as per **Figure 2—figure supplement 2**.

DOI: [10.7554/eLife.23717.010](https://doi.org/10.7554/eLife.23717.010)



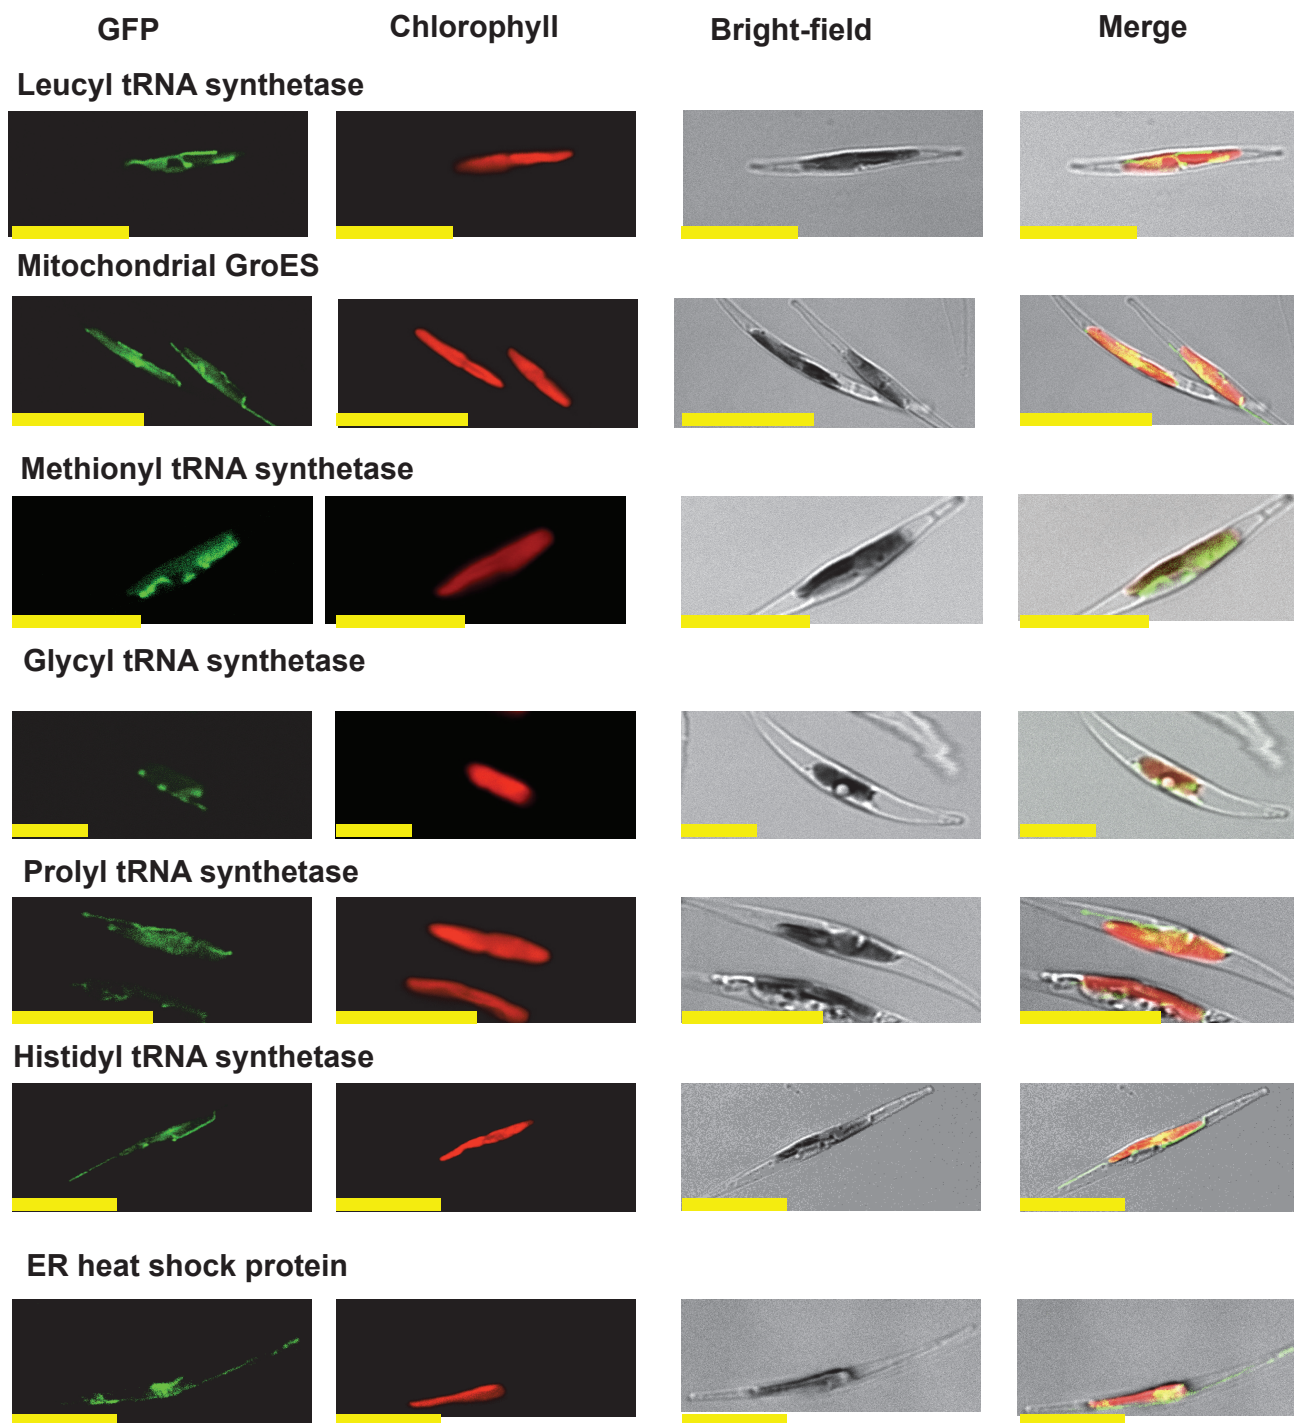

**Figure 2—figure supplement 5.** Multipartite *Phaeodactylum* plastid-targeted proteins. This figure shows the localisation of GFP overexpression constructs for copies of seven proteins from the diatom *Phaeodactylum tricornutum* that are of non-plastid origin, but show multipartite localization to the plastid and one other organelle (the mitochondria, or in the case of the 'ER heat shock protein' to the endoplasmic reticulum).

DOI: [10.7554/eLife.23717.011](https://doi.org/10.7554/eLife.23717.011)



**A** *Glenodinium foliaceum*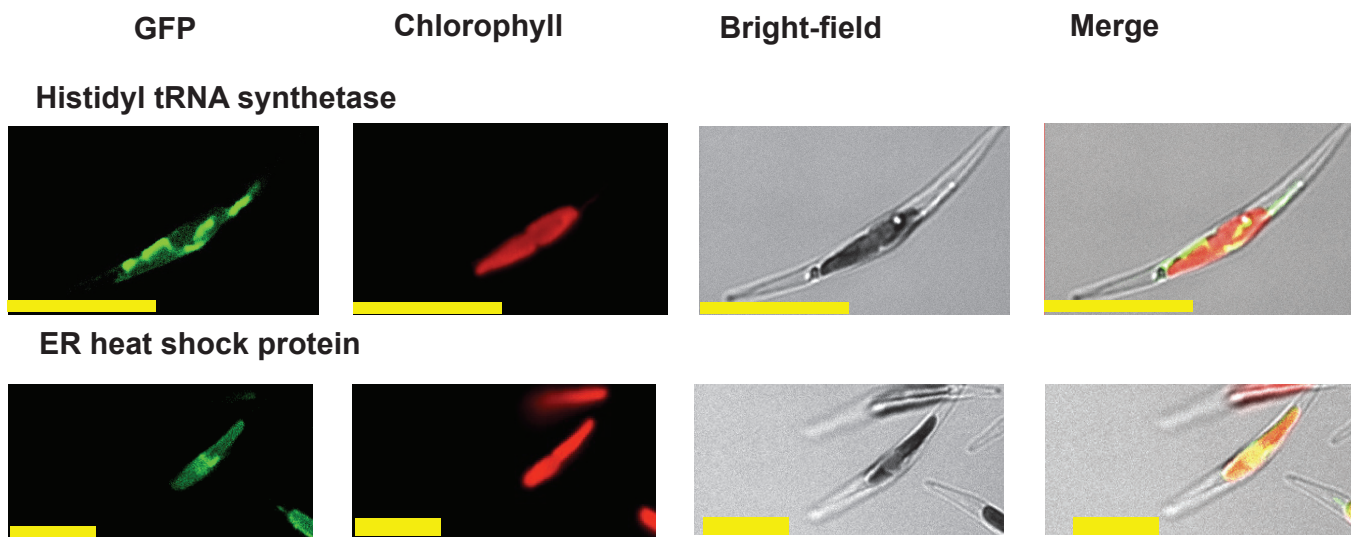**B** *Nannochloropsis gaditana*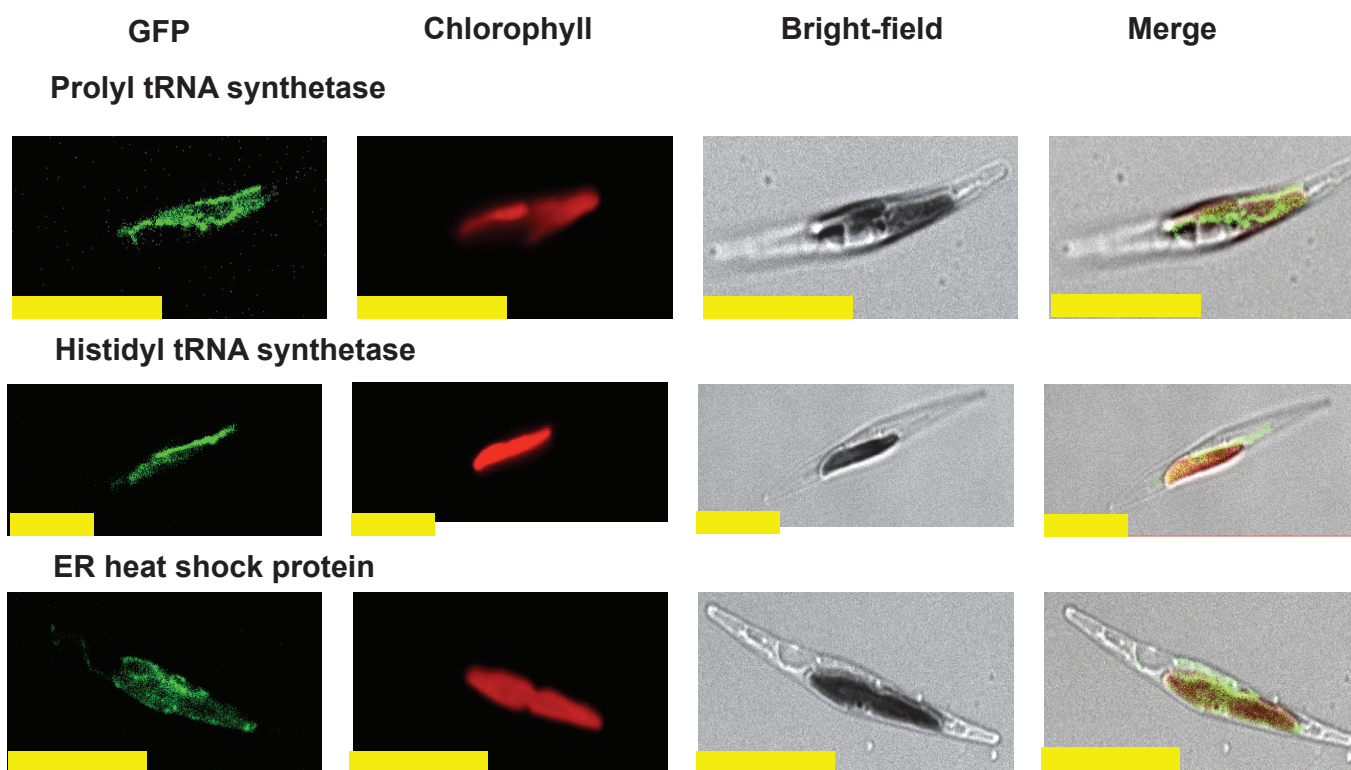

**Figure 2—figure supplement 6.** Heterologous expression constructs of multipartite plastid-targeted proteins. This figure shows the localisation of GFP overexpression constructs for copies of two proteins from the dinotom *Glenodinium foliaceum* (Panel A), and three proteins from the eustigmatophyte *Nannochloropsis gaditana* (Panel B) that are of non-plastid origin, but show multipartite localisation to the plastid and one other organelle, per **Figure 2—figure supplement 5**.

Figure 2—figure supplement 6 continued on next page

Figure 2—figure supplement 6 continued

DOI: [10.7554/eLife.23717.012](https://doi.org/10.7554/eLife.23717.012)

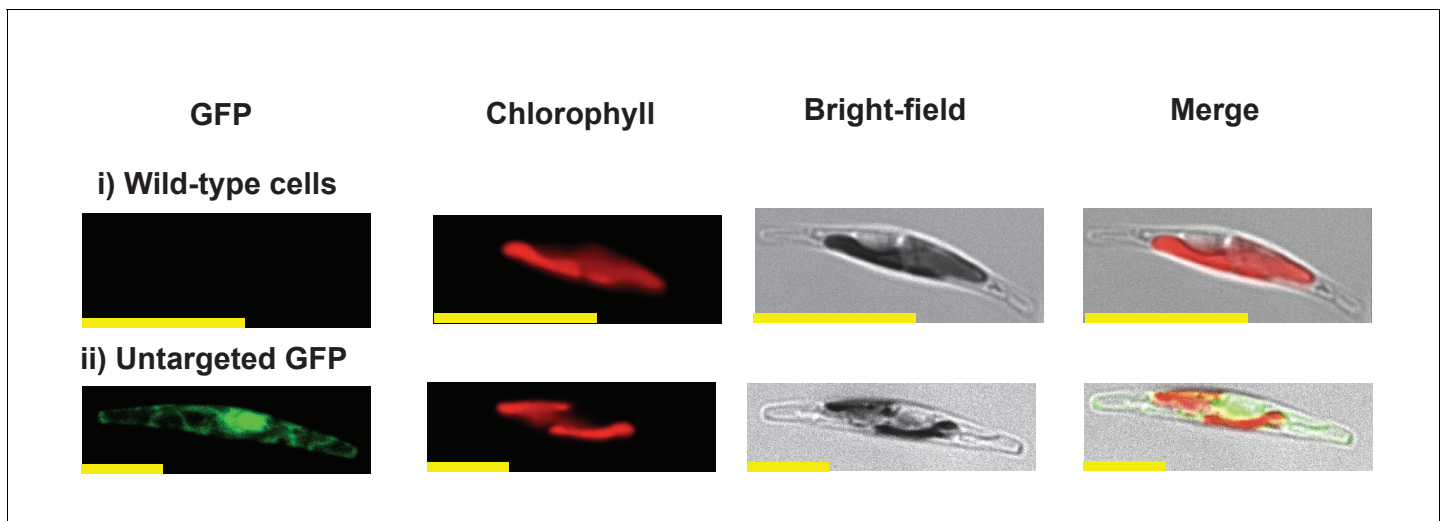

**Figure 2—figure supplement 7.** Exemplar control images for confocal microscopy. This figure shows fluorescence patterns for wild-type *Phaeodactylum tricornutum* cells (i), and transformant *Phaeodactylum* cells expressing GFP that has not been fused to any N-terminal targeting sequence (ii), both visualised under the same conditions used for all other cultures.

DOI: [10.7554/eLife.23717.013](https://doi.org/10.7554/eLife.23717.013)

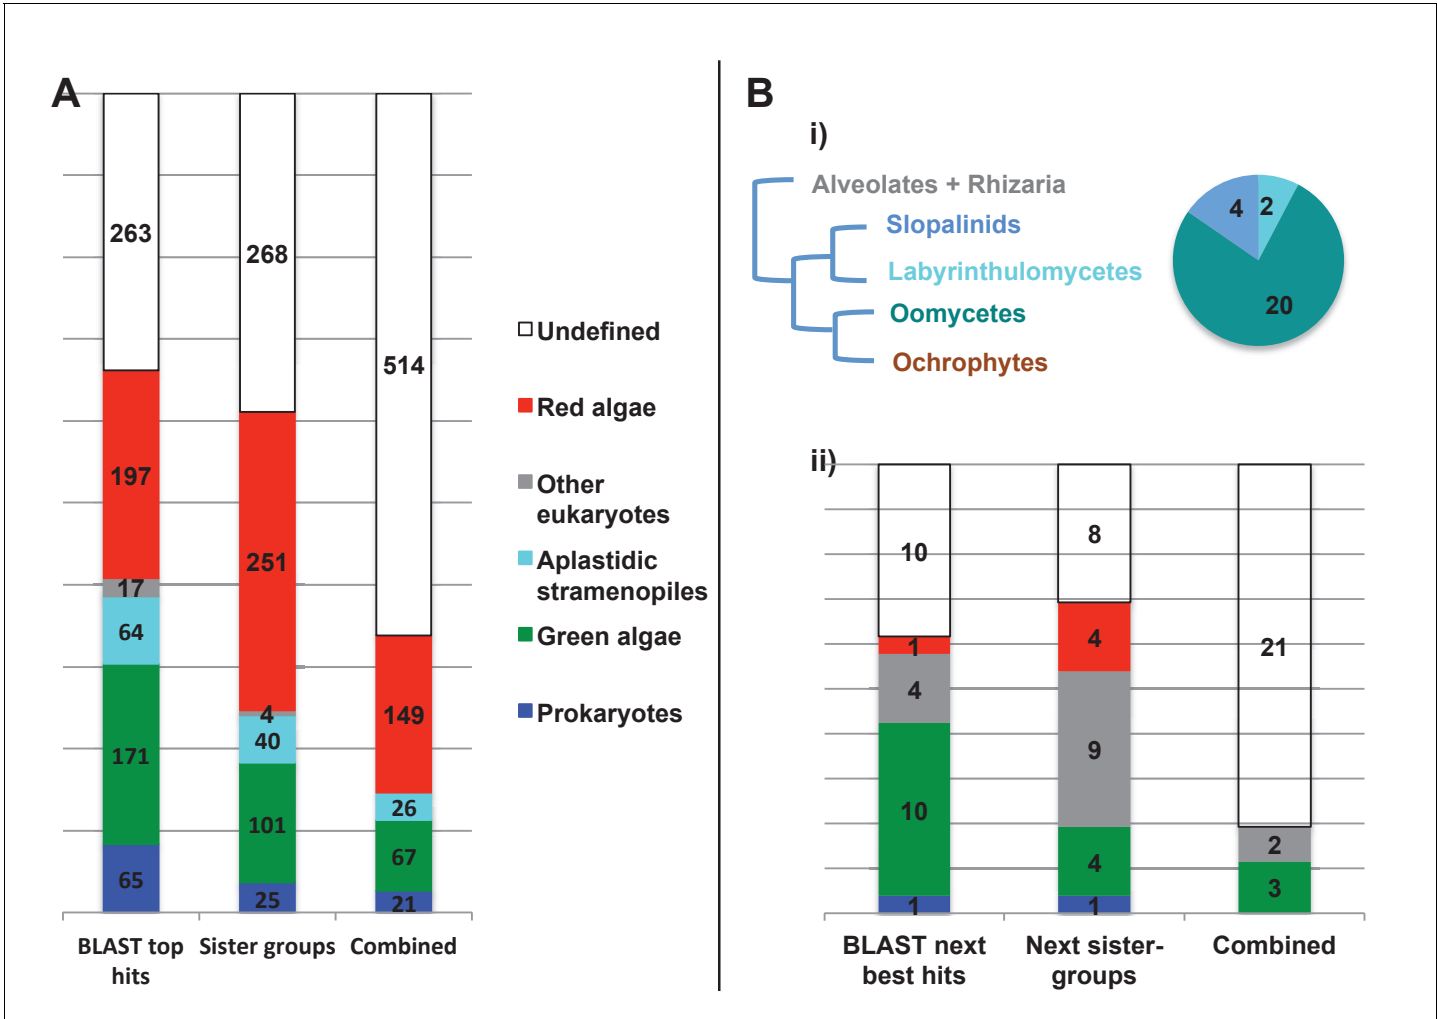

**Figure 3.** Evolutionary origins of the ochrophyte plastid proteome. (Panel A) displays the origins inferred by BLAST top hit, phylogenetic analysis, and combined analysis for all ancestral HPPGs. (Panel B) shows (i) a schematic diagram of stramenopile taxonomy, with the evolutionary relationships between labyrinthulomycetes, oomycetes, slopalinids and ochrophytes proposed by recent multigene studies (*Derelle et al., 2016*), and the probable closest stramenopile relative (as inferred by BLAST top hit analysis) of the 26 ancestral HPPGs verified by combined analysis to be of aplastidic stramenopile origin, and (ii) the next nearest relative, as inferred through BLAST top hit, phylogenetic and combined analysis, of the 26 aplastidic stramenopile HPPGs verified by combined analysis. The evolutionary categories in this graph are shaded as per in panel A.

DOI: [10.7554/eLife.23717.014](https://doi.org/10.7554/eLife.23717.014)

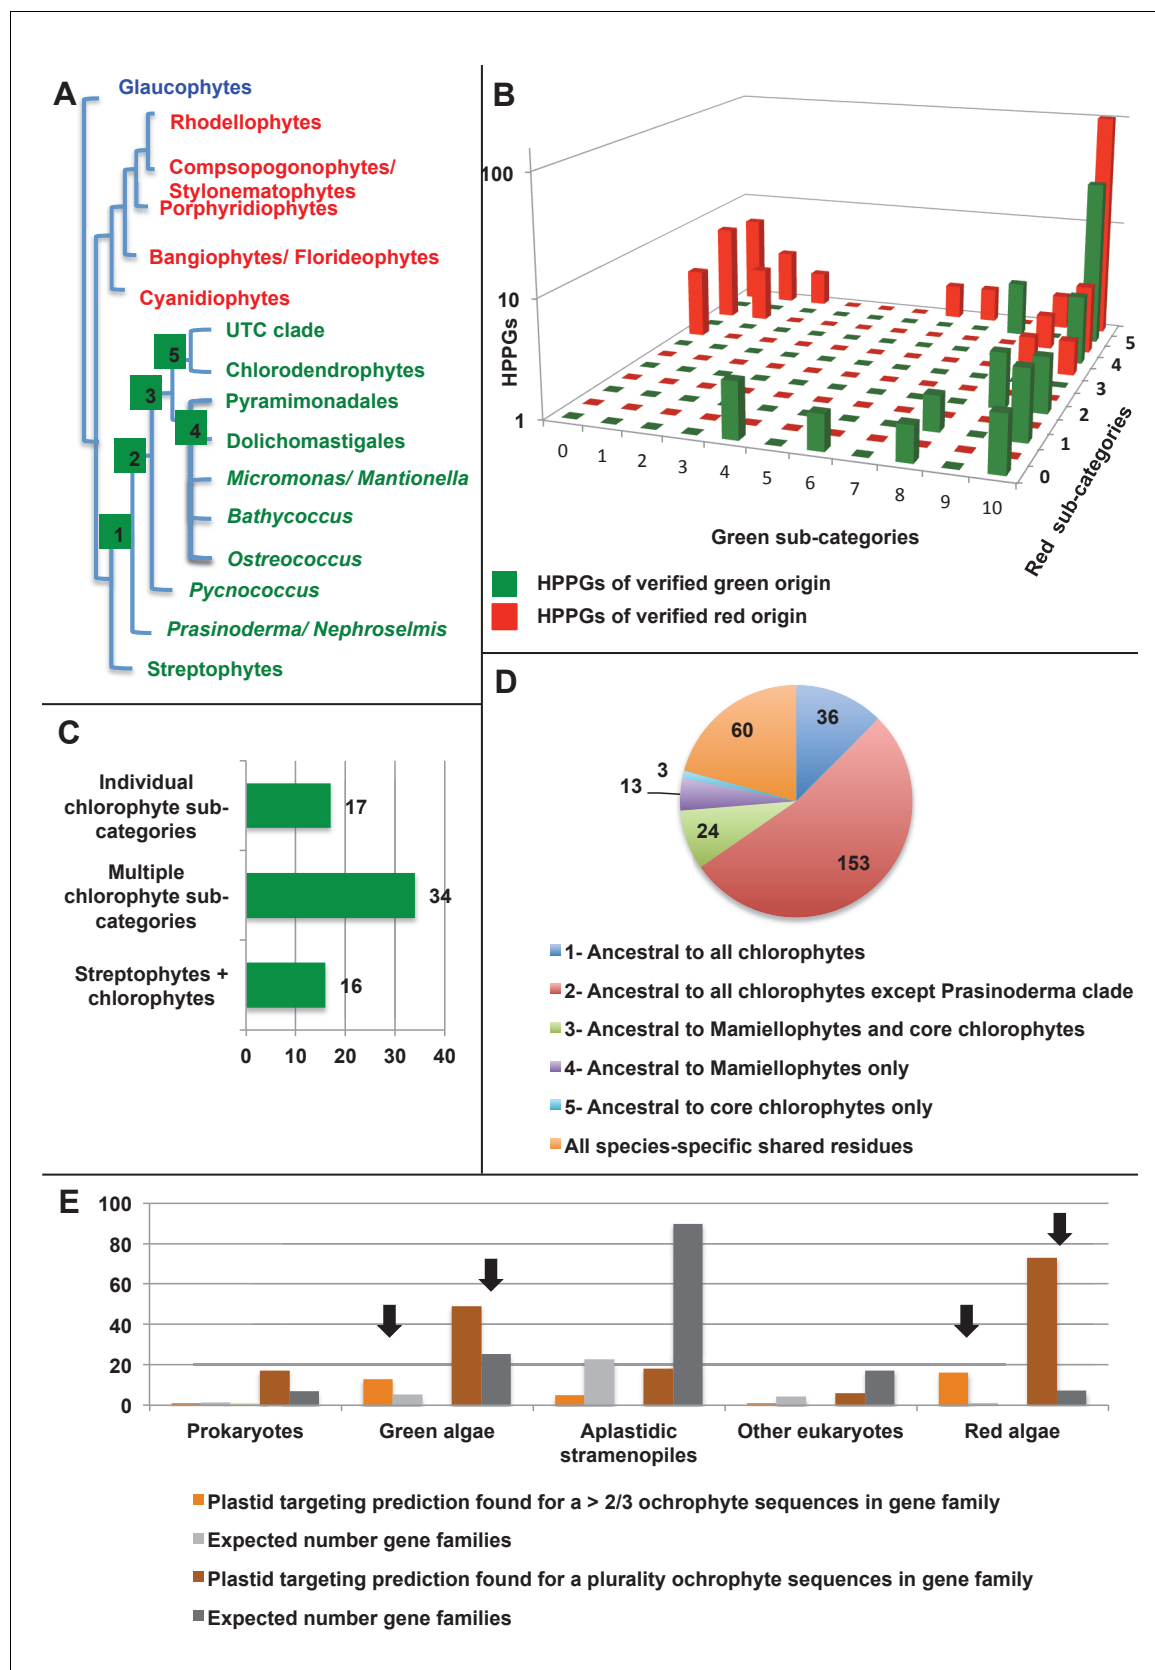

**Figure 4.** Verification and origins of the green signal in ochrophyte plastids. (Panel A) shows a schematic tree of the 11 archaeplastid sub-categories with which each green HPPG alignment was enriched prior to phylogenetic analysis. The topology of the red and green algae are shown according to Figure 4 continued on next page

## Figure 4 continued

previously published phylogenies (Leliaert et al., 2011; Yoon et al., 2006). Green sub-categories are in green text; red algal sub-categories in red text; and other sub-categories are in blue text. Five ancestral positions within the green algal tree inspected in subsequent analyses are labelled with coloured boxes. (Panel B) shows the number of HPPGs of verified red (red bars) or green origin (green bars) for which orthologues were identified in different numbers green sub-categories (plotted on the x-axis) and red sub-categories (plotted on the z-axis). An equivalent graph showing only HPPGs for which a glaucophyte orthologue was detected is shown in **Figure 4—figure supplement 1**. (Panel C) compares the number of trees in which HPPGs of verified green origin resolve as a sister group to all green lineages (including chlorophytes and streptophytes); to multiple chlorophyte sub-categories but to the exclusion of streptophytes; and to individual chlorophyte sub-categories only. A detailed heatmap of the evolutionary distribution of the green sub-categories detected in each sister-group is shown in **Figure 4—figure supplement 2**, and the distribution of BLAST top hits within each sub-category is shown in **Figure 4—figure supplement 3**. (Panel D) lists the number of residues inferred from a dataset of 32 ochrophyte HPPGs of verified green origin, which have been subsequently entirely vertically inherited in all major photosynthetic eukaryotic lineages, to be uniquely shared between ochrophytes and some but not all green lineages, hence might represent specific synapomorphic residues. Residues are categorized by inferred origin point within the tree topology shown in panel A, i.e., each of the five ancestral nodes labelled. A final category shows all of the residues inferred to be specifically shared with one green sub-category, and not with any other. The distribution of residues based on the earliest possible origin point (taking into account gapped and missing residues in each HPPG alignment) is shown in **Figure 4—figure supplement 4**. (Panel E) shows the number of the 7140 conserved gene families inferred to have been present in the last common ochrophyte ancestor that are predicted by ASAFind to encode proteins targeted to the plastid, subdivided by probable evolutionary origin, and the number expected to be present in each category assuming a random distribution of plastid-targeted proteins across the entire dataset, independent of evolutionary origin. Evolutionary categories of proteins found to be significantly more likely (chi-squared test,  $p=0.05$ ) to encode plastid-targeted proteins than would be expected are labelled with black arrows. An equivalent distribution of plastid-targeted proteins inferred using HECTAR is shown in **Figure 4—figure supplement 5**.

DOI: [10.7554/eLife.23717.015](https://doi.org/10.7554/eLife.23717.015)

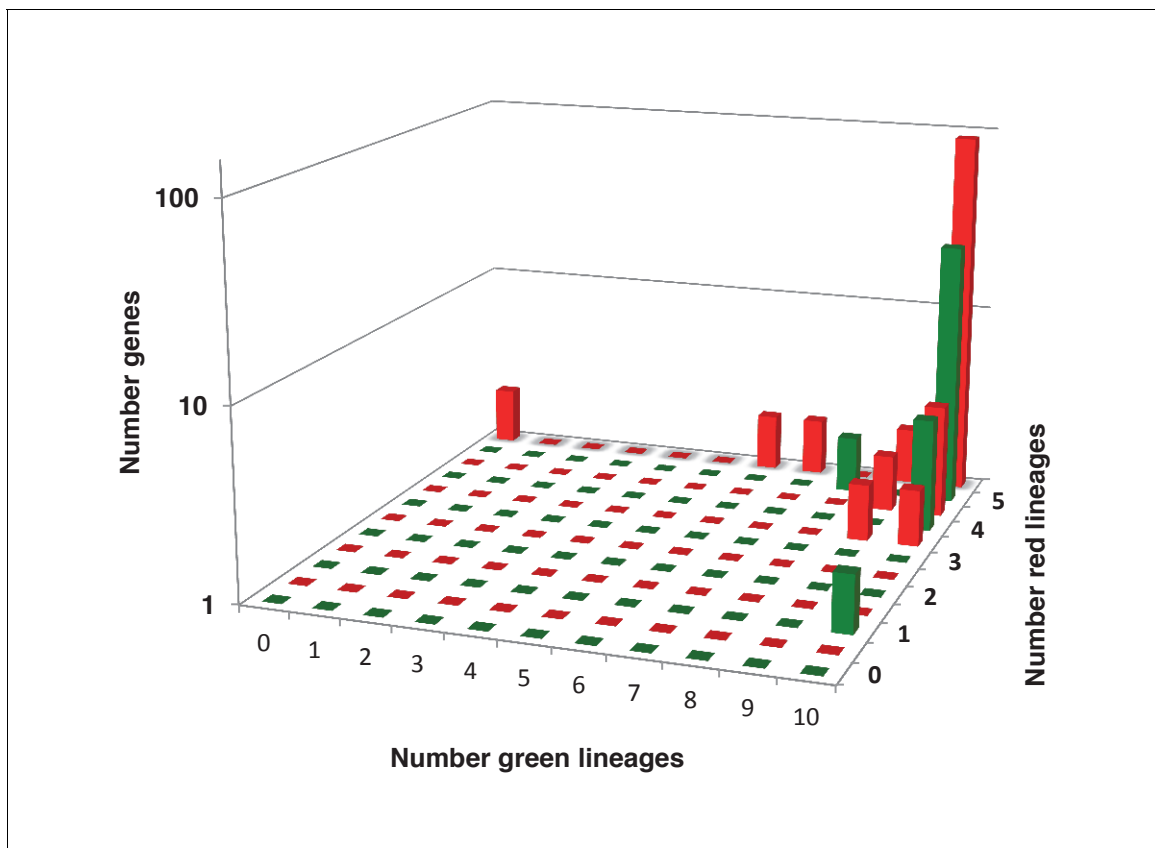

**Figure 4—figure supplement 1.** Sampling richness associated with ancestral HPPGs of green algal origin. This figure shows the number of sub-different archaeplastid orthologues for ancestral HPPGs verified by combined BLAST top hit and single-gene tree analysis to be of either green algal origin (green bars) or red algal origin (red bars), for which glaucophyte orthologues were also identified.

DOI: [10.7554/eLife.23717.016](https://doi.org/10.7554/eLife.23717.016)

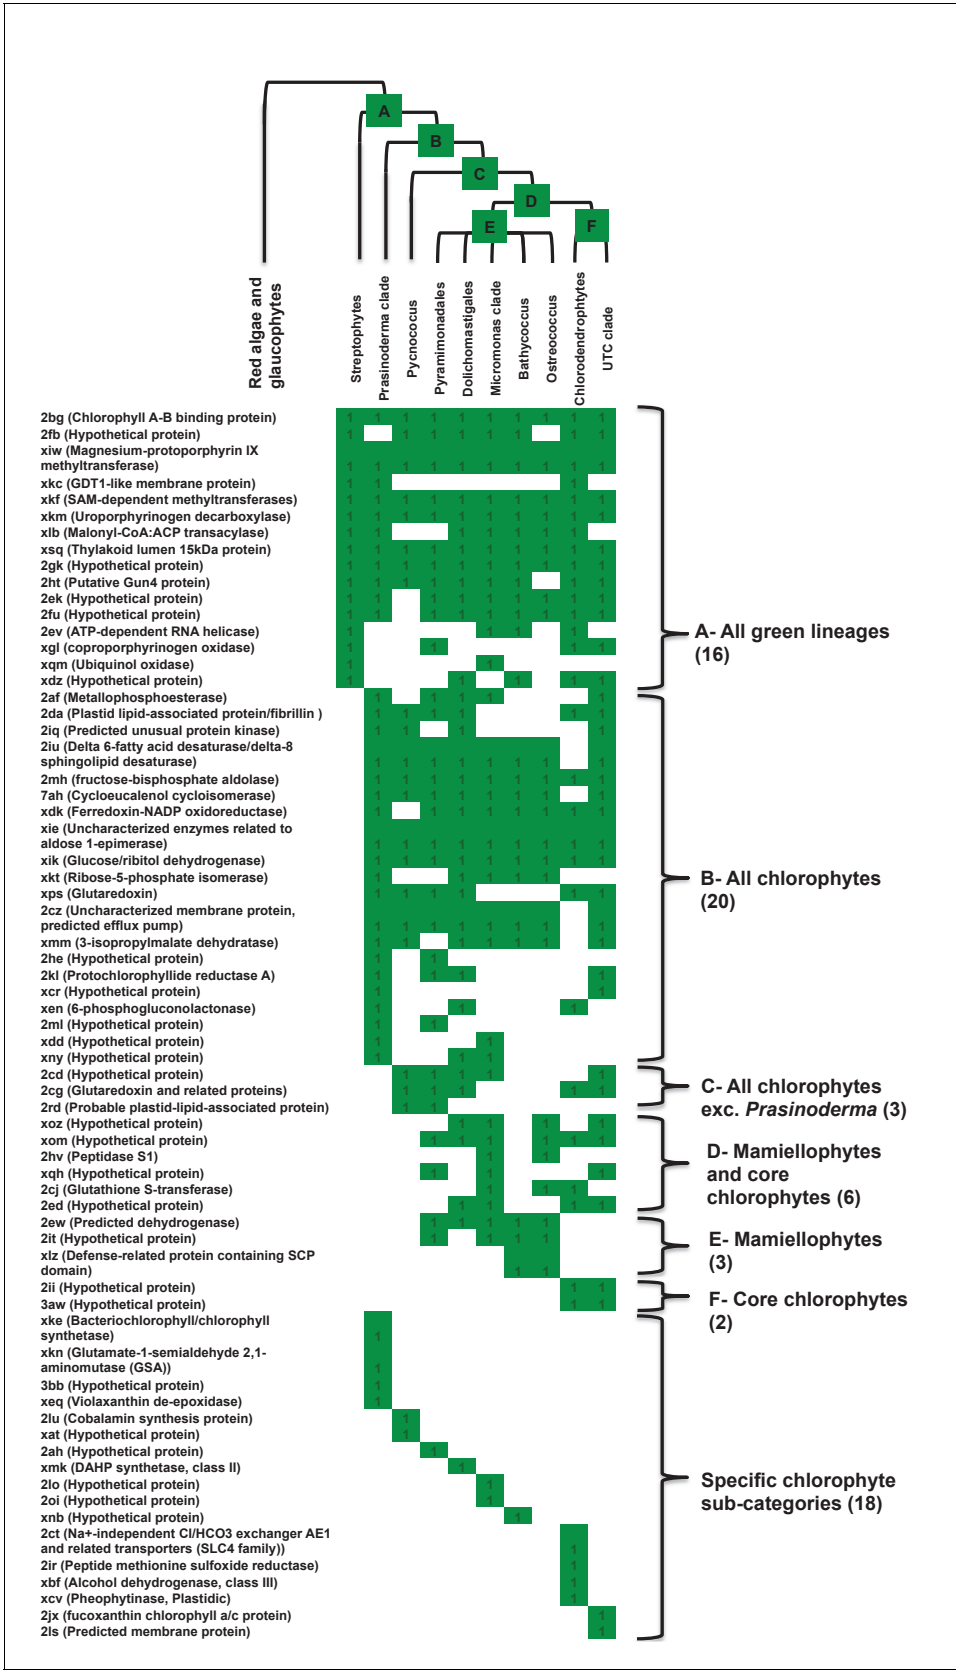

**Figure 4—figure supplement 2.** Heatmaps of nearest sister-groups of ancestral HPPGs of verified green origin. This figure shows the specific topologies of single gene trees for HPPGs verified to be of green origin by combined BLAST and phylogenetic analysis. (Panel A) shows a reference Figure 4—figure supplement 2 continued on next page



*Figure 4—figure supplement 2 continued*

topology of evolutionary relationships between green lineages, defined as per **Leliaert et al. (2011)**. Six ancestral nodes that might correspond to the origin point of ochrophyte HPPGs are labelled with coloured boxes. (Panel **B**) shows the presence and absence of each green subcategory in the immediate sister-group to the ochrophyte HPPG in each single tree of HPPGs of verified origin. HPPGs are grouped by the inferred origin point within the green algae, with the number of HPPGs identified for each origin point given with round brackets.

DOI: [10.7554/eLife.23717.017](https://doi.org/10.7554/eLife.23717.017)

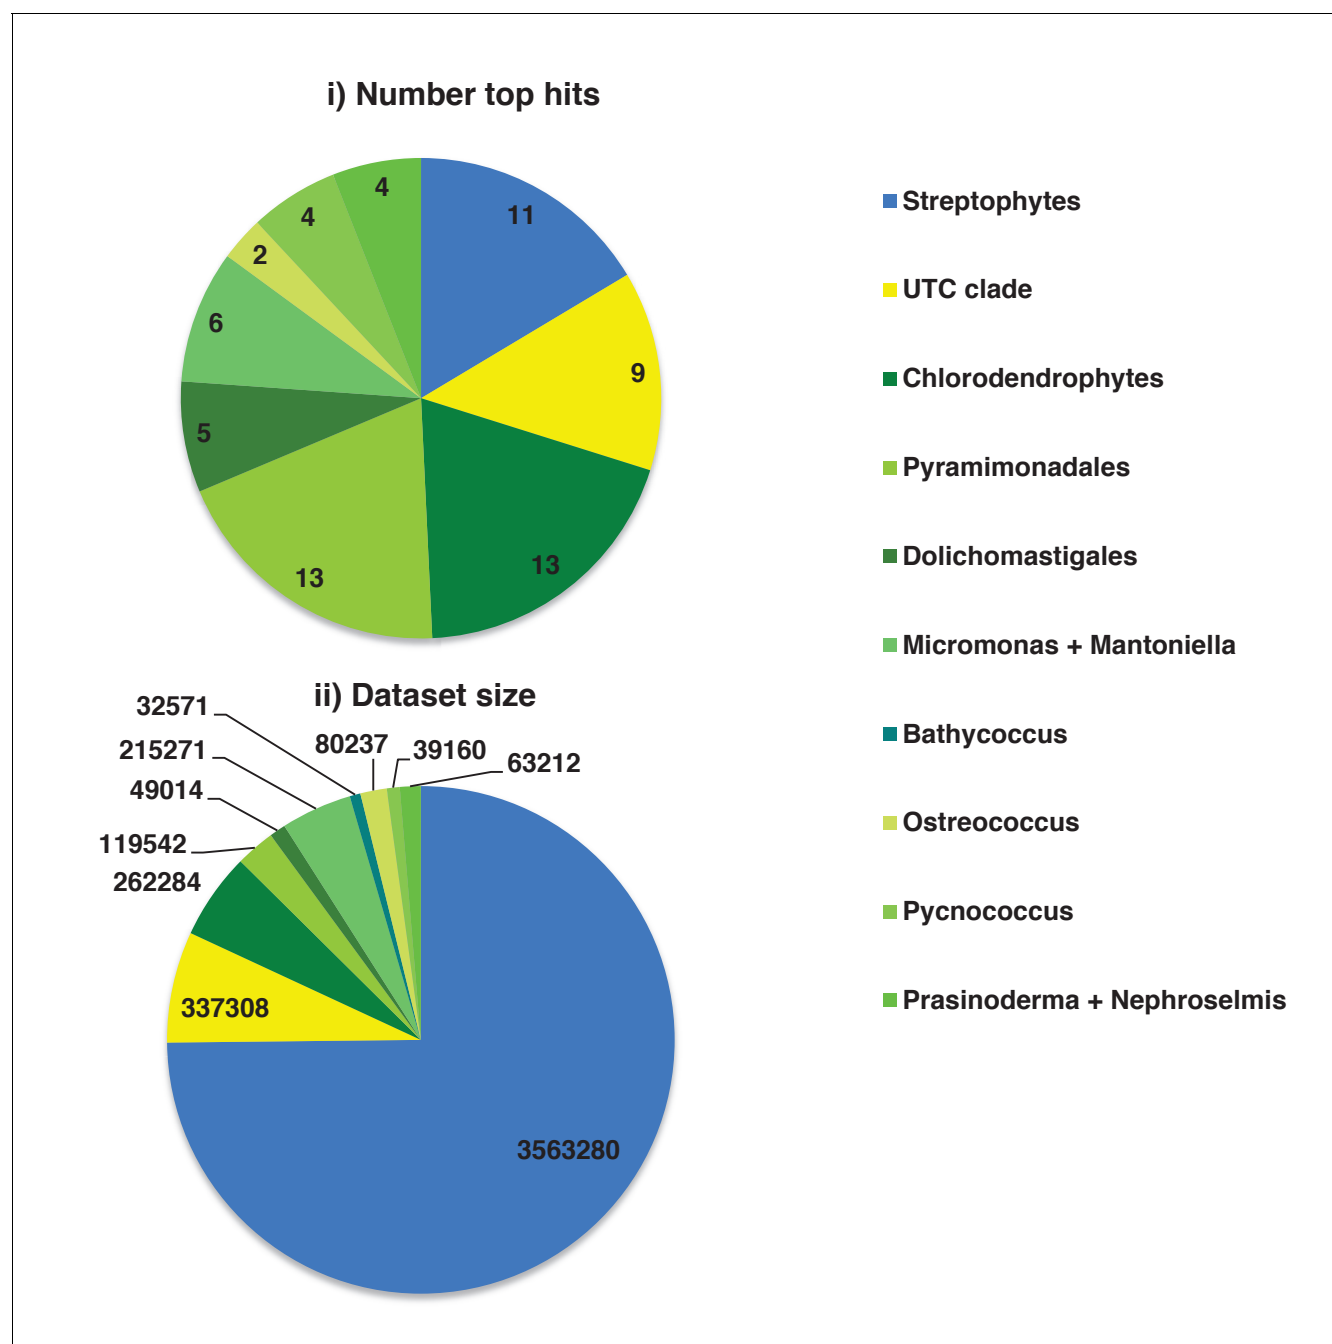

**Figure 4—figure supplement 3.** Specific origins of green HPPGs as inferred from BLAST top hit analyses. These charts show (i) the number of BLAST top hits against each of the individual green sub-categories from HPPGs for which a green origin was identified both from BLAST top hit and single-gene tree analysis, and (ii) the total number of non-redundant sequences from each green sub-category included in the BLAST library.

DOI: [10.7554/eLife.23717.018](https://doi.org/10.7554/eLife.23717.018)

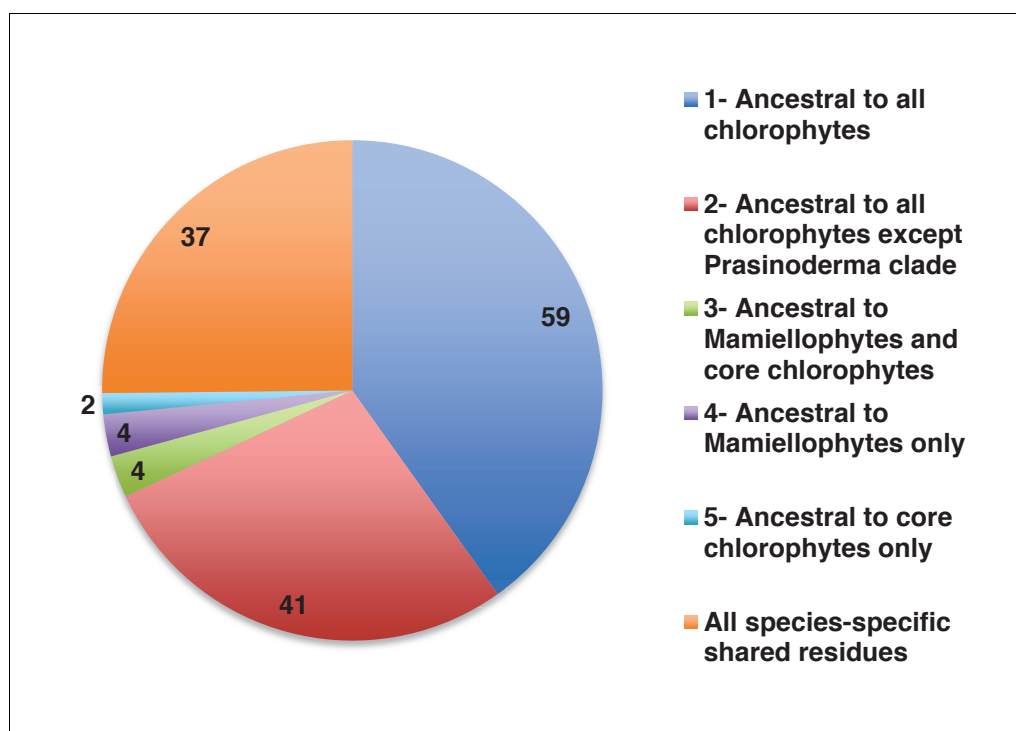

**Figure 4—figure supplement 4.** Earliest evolutionary origins of shared plastid residues. This figure shows the number of residues in the concatenated alignment of HPPGs of verified green origin, which have been subsequently vertically inherited in all major photosynthetic eukaryotes that are present in green algae and ochrophytes, and are not found in red algae and glaucophytes. Residues are divided by inferred origin point, and are shown as per **Figure 4**, panel D. The values here are calculated as the earliest possible origin point for each uniquely shared residue, in which all gapped and missing positions within the alignment are treated as potential identities. 100 of the 147 residues inferred to have originated within green algae in this analysis originated either within a common ancestor of all chlorophytes, or in a common ancestor of all chlorophytes excluding the basally divergent lineages *Prasinoderma*, *Prasinococcus* and *Nephroselmis*.

DOI: [10.7554/eLife.23717.019](https://doi.org/10.7554/eLife.23717.019)

**A**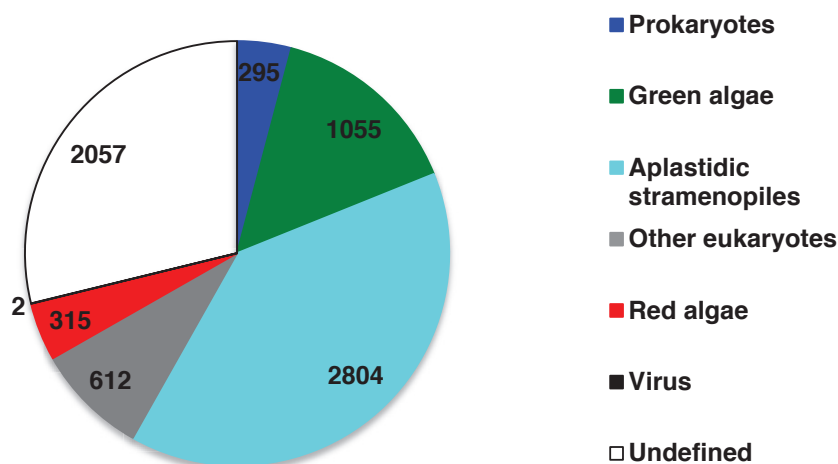**B**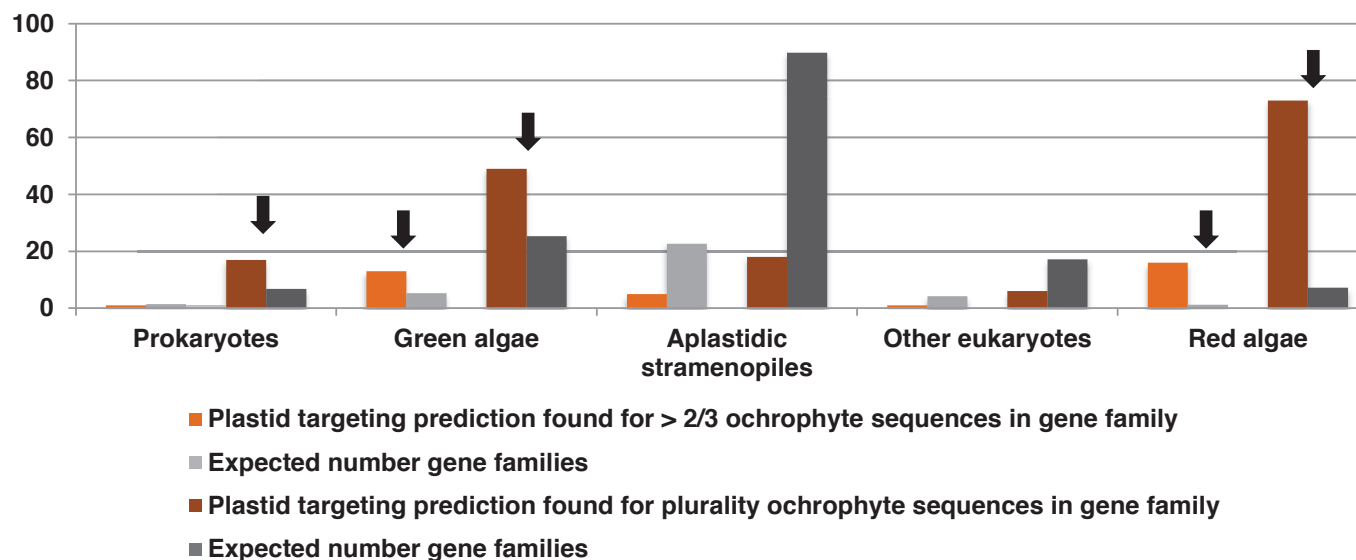

**Figure 4—figure supplement 5.** Origins and HECTAR based targeting tests of proteins encoded by conserved ochrophyte gene clusters. (Panel A) shows the most probably evolutionary origin, identified using BLAST top hit analysis, for 7140 conserved gene clusters inferred to have been present in the last common ochrophyte ancestor. (Panel B) shows the number of these gene families that are predicted by HECTAR to encode proteins targeted to the plastid, subdivided by probable evolutionary origin, and the number expected to be present in each category assuming a random distribution of plastid-targeted proteins across the entire dataset, independent of evolutionary origin. Categories inferred to be significantly enriched above the expected values are labelled with black arrows.

DOI: [10.7554/eLife.23717.020](https://doi.org/10.7554/eLife.23717.020)

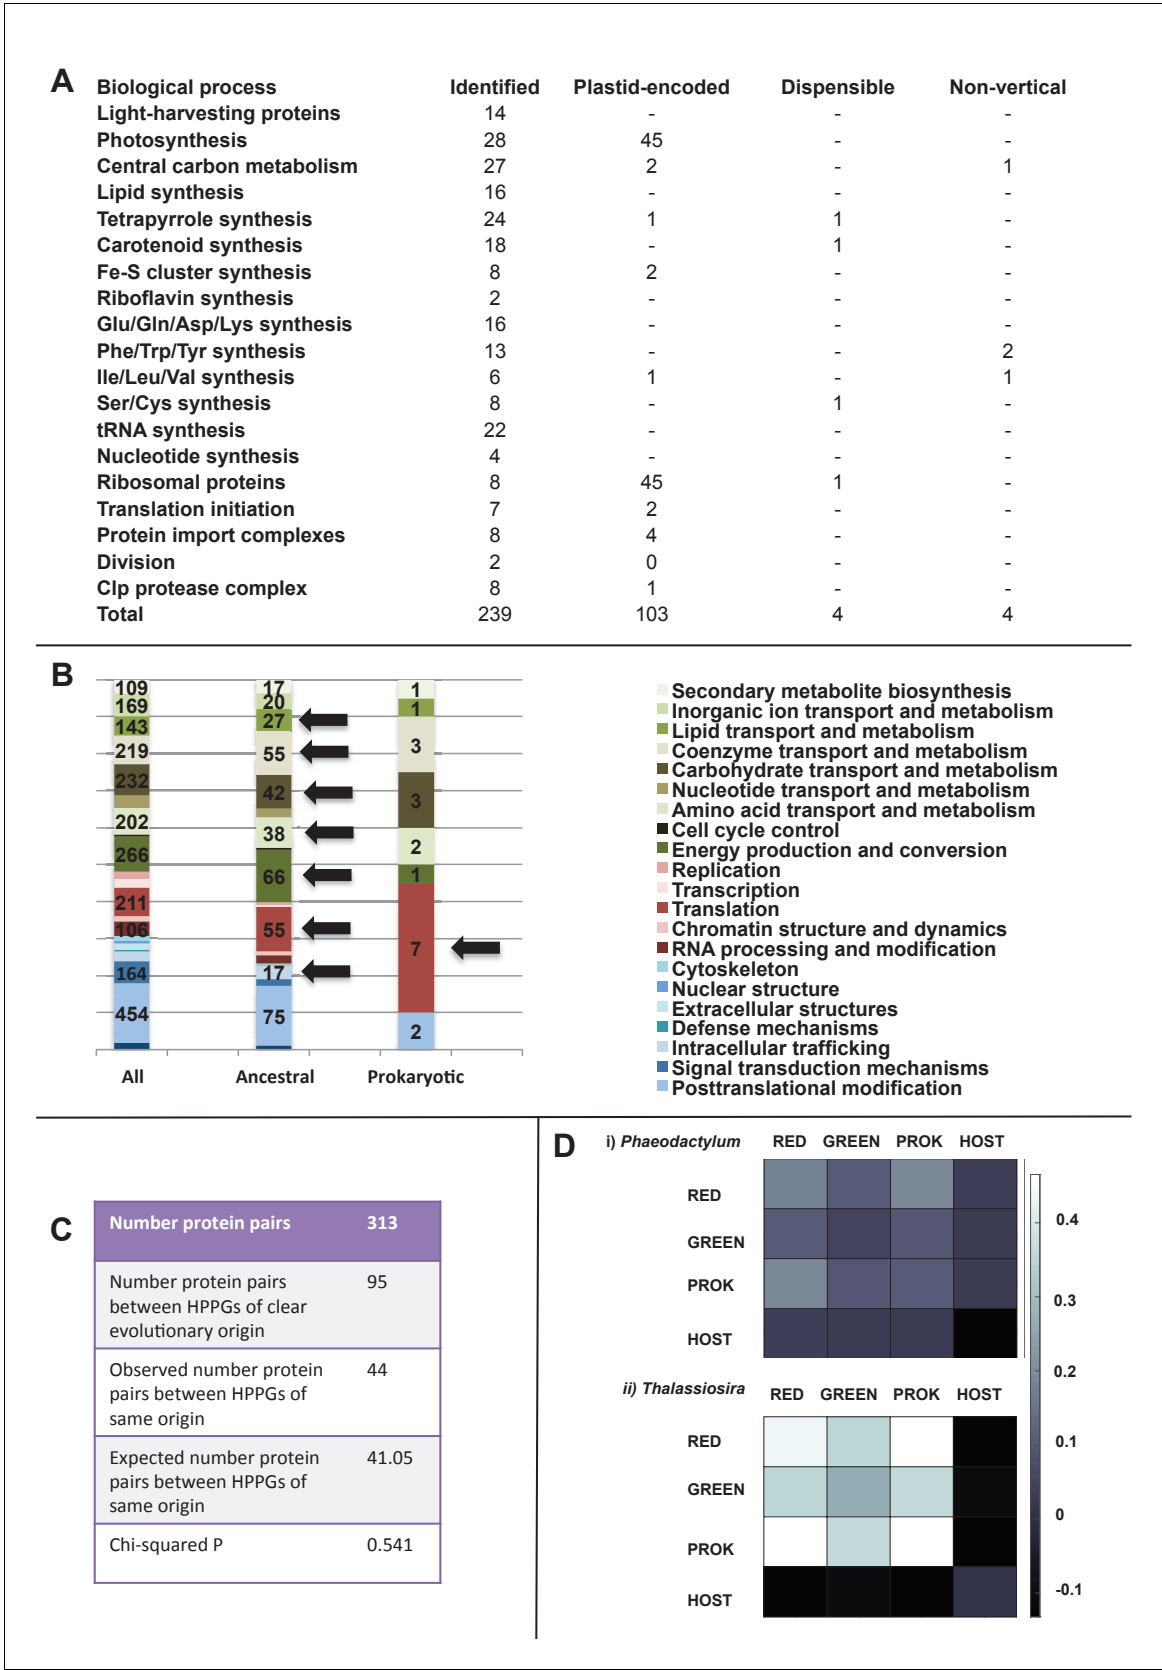

## Figure 5 continued

pathway is provided in **Figure 5—figure supplement 1**, and an overview and phylogenetic trees of each of the non-vertically inherited enzymes identified are provided in **Figure 5—figure supplements 2–6**. (Panel **B**) compares the distribution of individual KOG families in the complete HPPG library, the ancestral HPPG dataset, and HPPGs of verified prokaryotic origin. KOG families pertaining to metabolism are shown in shades of green, families pertaining to information storage are shown in shades of red, and families pertaining to cellular processes are shown in shades of blue. Families with unknown KOG classification or general function predictions only are not shown. KOG classes that are enriched in the ancestral HPPG dataset compared to the relative proportions of each KOG class found in the full HPPG dataset, or in individual ancestral HPPGs of prokaryotic origin compared to the ancestral HPPG dataset (as inferred by chi-squared test,  $p < 0.05$ ), are labelled with black horizontal arrows. No such enrichments were observed in any evolutionary category of ancestral HPPGs other than prokaryotes, hence analogous distributions of HPPGs of red algal, green algal and host origin are not shown. Overviews of the broader KOG classes that are enriched either in the ancestral HPPG dataset, or in specific evolutionary categories of ancestral HPPG, are shown in **Figure 5—figure supplement 7**. (Panel **C**) tabulates the number of ancestral HPPGs performing consecutive metabolic functions, or that are likely to have direct regulatory interactions, alongside the number of these protein pairs in which both members are of verified evolutionary origin; the number observed where both members possess the same evolutionary origin; the expected number of protein pairs where both members possess the same evolutionary origin; and the chi-squared probability of similarity between the observed and expected values. (Panel **D**) shows heatmaps for the pairwise correlation coefficients of expression for genes encoding different evolutionary categories, as verified using combined BLAST top hit and single-gene tree analysis, of ancestral HPPGs in the model diatoms *Phaeodactylum tricornutum* (i) and *Thalassiosira pseudonana* (ii). A scale bar showing the relationship between shading and correlation coefficient is shown to the right of the heatmaps. Boxplots comparing the individual expression profiles of different categories of ancestral HPPG, and the associated ANOVA P values calculated, are shown in **Figure 5—figure supplement 8** (for *P. tricornutum*) and **Figure 5—figure supplement 9** (for *T. pseudonana*).

DOI: [10.7554/eLife.23717.021](https://doi.org/10.7554/eLife.23717.021)

| Key                            | Origin                                         | Confidence | Cluster                      | Enzyme                                              | Origin                                     | Cluster                                                               | Enzyme                                          | Origin                                     |
|--------------------------------|------------------------------------------------|------------|------------------------------|-----------------------------------------------------|--------------------------------------------|-----------------------------------------------------------------------|-------------------------------------------------|--------------------------------------------|
|                                | Plastid-encoded                                | High       |                              |                                                     |                                            |                                                                       |                                                 |                                            |
|                                | Red algae                                      | Low        |                              |                                                     |                                            |                                                                       |                                                 |                                            |
|                                | Green algae                                    | n/a        |                              |                                                     |                                            |                                                                       |                                                 |                                            |
|                                | Prokaryotes                                    |            |                              |                                                     |                                            |                                                                       |                                                 |                                            |
|                                | Aplastidic stramenopiles                       |            |                              |                                                     |                                            |                                                                       |                                                 |                                            |
|                                | Other/ unresolved                              | n/a        |                              |                                                     |                                            |                                                                       |                                                 |                                            |
| Cluster Enzyme                 |                                                |            |                              |                                                     |                                            |                                                                       |                                                 |                                            |
| 1. Light harvesting            |                                                |            |                              |                                                     |                                            |                                                                       |                                                 |                                            |
| 2ka                            | Divergent l1818-type                           |            | 4. Fatty acid biosynthesis   |                                                     | 8. Riboflavin biosynthesis                 |                                                                       | 13. Aminoacyl-tRNA synthetases                  |                                            |
| xhu                            | High light inducible protein                   |            | a) Fatty acid synthesis      |                                                     | 2oe                                        | 4-dihydroxy-2-butanone 4-phosphate synthase                           | xhe                                             | Alanyl-tRNA synthetase                     |
| 2kb                            | LhcA-type protein 1                            |            | xlv                          | Long-chain acyl-CoA transporter                     | 2oe                                        | GTP cyclohydrolase                                                    | 2mg                                             | Cysteinyl-tRNA synthetase 1                |
| 2kd                            | LhcA-type protein 2                            |            | xjx                          | Long-chain acyl-CoA synthetase                      | 4hc                                        | Riboflavin synthase                                                   | 2cw                                             | Cysteinyl-tRNA synthetase 2                |
| 2kc                            | LhcA-type protein 3                            |            | xpy                          | Acetyl-coA:carboxylase                              |                                            |                                                                       | 2np                                             | Aspartyl-tRNA synthetase                   |
| 2ke                            | LhcA-type protein 4                            |            | xlb                          | Malonyl-CoA:ACP transacylase                        |                                            |                                                                       | 2mr                                             | Phenylalanyl-tRNA synthetase 1             |
| 2jx                            | LhcF-type protein 1                            |            | xph                          | Beta-ketoacyl synthase                              | 2bx                                        | Pyruvate transporter                                                  | 2ml                                             | Phenylalanyl-tRNA synthetase 2             |
| 2jw                            | LhcF-type protein 2                            |            | abx                          | Beta-ketoacyl-ACP reductase                         | 2ct                                        | Bicarbonate transporter                                               | 2lx                                             | Glycyl-tRNA synthetase                     |
| 2jz                            | LhcF-type protein 3                            |            | xik                          | Enoyl-ACP reductase                                 | 2hk                                        | Pyruvate carboxylase                                                  | 2ja                                             | Glycyl-tRNA synthetase                     |
| 2kf                            | LhcR-type protein 1                            |            | 2ig                          | Long chain fatty acid elongase 1                    | 2ml                                        | Aspartate aminotransferase                                            | xmg                                             | Histidyl-tRNA synthetase                   |
| abj                            | LhcR-type protein 2                            |            | 2gl                          | Long chain fatty acid elongase 2                    | 2jb                                        | Glutamine synthetase                                                  | 2pe                                             | Isoleucyl-tRNA synthetase                  |
| 2kh                            | LhcR-type protein 3                            |            | 2ge                          | Fatty acid desaturase 1                             | xso                                        | Kynurenine aminotransferase                                           | 9aa                                             | Lysyl-tRNA synthetase                      |
| 2kb                            | LhcR-type protein 4                            |            | 2lu                          | Fatty acid desaturase 2                             | 2jk                                        | Glutamate synthase                                                    | 2kq                                             | Leucyl-tRNA synthetase                     |
| abk                            | LhcR-type protein 5                            |            | 2jn                          | Fatty acid desaturase 3                             | 2jk                                        | Glutamate synthase                                                    | xdi                                             | Methionyl-tRNA synthetase                  |
| 2bg                            | L1818-type                                     |            | b) Glycerol metabolism       |                                                     | 2jk                                        | Aspartate branch                                                      | xqu                                             | Asparaginyl-tRNA synthetase                |
| 2. Photosynthesis              |                                                |            |                              |                                                     |                                            |                                                                       |                                                 |                                            |
| xmo                            | PsaA,B,C,D,E,F,H,I,J,K,L,N,T,V,W,X,Y,Z         |            | 2ky                          | Glycerol-3-phosphate dehydrogenase                  | xik                                        | Aspartate kinase                                                      | xsa                                             | Prolyl-tRNA synthetase                     |
| xhz                            | Psb27                                          |            | 2kn                          | Glyceroldehyde 3-phosphate dehydrogenase            | 2cy                                        | Aspartate-semialdehyde dehydrogenase 1                                | xho                                             | Glutamyl-tRNA synthetase                   |
| 2ax                            | PsbP                                           |            | 5. Tetrapyrrole biosynthesis |                                                     |                                            |                                                                       |                                                 |                                            |
| 2dx                            | Psb31                                          |            | a) Common branch             |                                                     | xgf                                        | Aspartate-semialdehyde dehydrogenase 2                                | 9ac                                             | Arginyl-tRNA synthetase                    |
| abn                            | Psb31                                          |            | 2ol                          | Glutamyl-tRNA synthetase                            | 2br                                        | Dihydrodipicolinate synthase                                          | xhf                                             | Seryl-tRNA synthetase                      |
| 2gd                            | PsbP                                           |            | aal                          | Glutamyl-tRNA reductase                             | 4ba                                        | Homoserine dehydrogenase                                              | xlu                                             | Threonyl-tRNA synthetase                   |
| 2js                            | PsbM                                           |            | xkn                          | Glutamate-1-semialdehyde 2,1-aminomutase (GSA)      | xis                                        | Dihydrodipicolinate reductase                                         | xky                                             | Valyl-tRNA synthetase                      |
| xkb                            | PsbO                                           |            | xin                          | Delta-aminolevulinic acid dehydratase               | xiw                                        | Diaminopimelate aminotransferase                                      | xfg                                             | Tryptophanyl-tRNA synthetase               |
| 2jn                            | PsbC                                           |            | xjr                          | Porphobilinogen desaminase                          | xol                                        | Diaminopimelate epimerase                                             | xfs                                             | Tryptophyl-tRNA synthetase                 |
| abw                            | PsbW superfamily                               |            | 2be                          | Uroporphyrin III synthase                           | xkz                                        | Diaminopimelate decarboxylase                                         |                                                 |                                            |
| 2fd                            | Psb29                                          |            | 2zc                          | Uroporphyrinogen decarboxylase 1                    |                                            |                                                                       | 14. Nucleotide synthesis and import             |                                            |
| xcc                            | petC                                           |            | xph                          | Uroporphyrinogen decarboxylase 2                    | xmk                                        | DAHPh synthetase                                                      | 2cs                                             | Adenylate kinase                           |
| 2al                            | petL/cytochrome c6                             |            | xkm                          | Uroporphyrinogen decarboxylase 3                    | abx                                        | 3-dehydroquinate synthase                                             | xnf                                             | Guanylate kinase                           |
| xmc                            | CPD61 protein required for cyt b6 assembly     |            | xgl                          | Coproporphyrinogen III oxidase 1                    | xiv                                        | 3-dehydroquinate reductase/ Shikimate dehydrogenase                   | 2ow                                             | UMP-CMP kinase                             |
| 2cc                            | petC                                           |            | xls                          | Coproporphyrinogen III oxidase 2                    | -                                          | Shikimate kinase                                                      | 2hu                                             | Nucleotide triphosphate transporter 1      |
| 2ai                            | petL/cytochrome c6                             |            | 4gc                          | Protoporphyrinogen oxidase                          | xix                                        | EPSP synthase                                                         | 15. Ribosome                                    |                                            |
| xlg                            | Ferredoxin 1                                   |            | b) Chlorophyll branch        |                                                     | xsl                                        | Chorismate synthase                                                   | rs2-14, rps16-20                                |                                            |
| xmv                            | Ferredoxin 2                                   |            | xnp                          | Magnesium chelatase subunit D                       | 9af                                        | Chorismate mutase                                                     | rp1-6, rp11-16, rp18-24, rp127, rp129, rp131-36 |                                            |
| 2lt                            | Ferredoxin-like component                      |            | xmg                          | Magnesium chelatase subunit H                       | 2ml                                        | Aspartate aminotransferase                                            | rs1A                                            |                                            |
| xdk                            | Ferredoxin-NADP oxidoreductase 1               |            | xm                           | Magnesium chelatase subunit I                       | xso                                        | Kynurenine/phenylpyruvate aminotransferase                            | rs15                                            |                                            |
| 2do                            | Ferredoxin-NADP oxidoreductase 2               |            | 2ki                          | Magnesium-PPIX methyltransferase                    | xsg                                        | Prephenate dehydrogenase                                              | 2mt                                             | rs10                                       |
| xln                            | Plastoquinol terminal oxidase                  |            | xmw                          | Protochlorophyllide reductase A                     | o) Tryptophan branch                       |                                                                       | xhv                                             | rs17                                       |
| xla                            | Photosystem II assembly factor Hcf136          |            | xie                          | 3,8-divinyl protochlorophyllide a 8-vinyl reductase | xir                                        | Antranilate synthase                                                  | xmh                                             | rs30A                                      |
| xgz                            | PsaO                                           |            | c) Haem branch               |                                                     | xid                                        | Antranilate phosphoribosyltransferase                                 | xid                                             | rs21                                       |
| 2bh                            | PGR5 protein                                   |            | 2kr                          | Haem oxygenase 1                                    | 2ag                                        | Phosphoribosyl-antranilate isomerase/ indole 3-galactosyl transferase |                                                 |                                            |
| xpd                            | PGR5-like protein                              |            | 2ks                          | Haem oxygenase 2                                    | abx                                        | Tryptophan synthase beta                                              | 16. Translation initiation                      |                                            |
| -                              | atpC                                           |            | 2jl                          | Haem transporter                                    | xfu                                        | Tryptophan synthase beta                                              | xjt                                             | Translation initiation factor 1            |
| xkk                            | atpC                                           |            | d) Catabolism                |                                                     |                                            |                                                                       | xjc                                             | Translation initiation factor 2            |
| 3. Central carbon metabolism   |                                                |            |                              |                                                     |                                            |                                                                       |                                                 |                                            |
| a) CBB cycle                   |                                                |            | 2cv                          | Phosphorylase                                       | 11. Branched chain amino acid biosynthesis |                                                                       | xjd                                             | Translation initiation factor 3            |
| -                              | Rubisco large subunit                          |            | 2gr                          | Phosphotriase                                       | -                                          | Valine isocitrate branch                                              | -                                               | Translation elongation factor EF-Tu        |
| 2ag                            | Rubisco small subunit                          |            |                              |                                                     | xmy                                        | Keto-acid reductoisomerase                                            | -                                               | Translation elongation factor EF-Ts        |
| 2ms                            | 3-phosphoglycerate kinase                      |            |                              |                                                     | xiz                                        | 4-hydroxy-3-methylglutaryl-CoA lyase                                  | xcr                                             | Translation elongation factor P            |
| 2kn                            | Glyceroldehyde 3-phosphate dehydrogenase       |            |                              |                                                     | xiz                                        | Branched-chain amino acid aminotransferase II                         | xjl                                             | Translation elongation factor G            |
| xip                            | Triosephosphate isomerase                      |            |                              |                                                     | b) Leucine branch                          |                                                                       | 2qq                                             | Ribosome release factor                    |
| -                              | Fructose-bisphosphate aldolase                 |            |                              |                                                     | -                                          | Isoalloxanthine synthase                                              | xqf                                             | Ribosome recycling factor                  |
| xmh                            | Sedoheptulose biphosphatase                    |            |                              |                                                     | xmm                                        | 3-isopropylmalate isomerase                                           |                                                 |                                            |
| xlc                            | Fructose-1,6-bisphosphatase 1                  |            |                              |                                                     | xkq                                        | 3-isopropylmalate dehydrogenase                                       | 17. Plastid protein import                      |                                            |
| 2jl                            | Fructose-1,6-bisphosphatase 2                  |            |                              |                                                     | xiz                                        | Branched-chain amino acid aminotransferase II                         | -                                               | secA, G, Y                                 |
| 2aa                            | Fructose-1,6-bisphosphatase 3                  |            |                              |                                                     |                                            |                                                                       | 2eq                                             | TatA/B                                     |
| xji                            | Transketolase                                  |            |                              |                                                     | 12. Serine and cysteine biosynthesis       |                                                                       | 2qs                                             | Signal peptidase complex subunit Srp12     |
| xkt                            | Ribose-5-phosphate isomerase                   |            |                              |                                                     | a) Serine branch                           |                                                                       | xds                                             | Signal peptidase complex subunit Srp22     |
| 2ij                            | D-ribulose-5-phosphate 3-epimerase             |            |                              |                                                     | xbs                                        | Serine hydroxymethyltransferase                                       | 2fq                                             | Signal peptidase complex subunit Srp27     |
| acq                            | Phosphoribulokinase 1                          |            |                              |                                                     | b) Cysteine branch                         |                                                                       | 2jv                                             | Signal recognition particle, subunit Srp54 |
| xfi                            | Phosphoribulokinase 2                          |            |                              |                                                     | xly                                        | ATP sulphurylase (sulphate adenylyltransferase)                       | 2ce                                             | Tic20                                      |
| b) Glycolysis/ gluconeogenesis |                                                |            |                              |                                                     | xiv                                        | Adenosine sulphate kinase                                             | 2ly                                             | Tic21                                      |
| 2bo                            | Phosphoglycerate mutase 1                      |            |                              |                                                     | xkd                                        | Phosphoadenosine phosphosulphate reductase 2                          | 2iz                                             | Tic110                                     |
| 2je                            | Phosphoglycerate mutase 2                      |            |                              |                                                     | xki                                        | Sulphite reductase (ferredoxin) 1                                     | 18. Plastid division                            |                                            |
| 2ko                            | Enolase                                        |            |                              |                                                     | xra                                        | Sulphite reductase (ferredoxin) 2                                     | xia                                             | Cell division protein FtsH                 |
| xir                            | Pyruvate kinase                                |            |                              |                                                     | xrc                                        | Cysteine synthase                                                     | 3ap                                             | Cell division protein FtsZ                 |
| 2dd                            | Pyruvate dehydrogenase                         |            |                              |                                                     | xqx                                        | Serine O-acetyltransferase                                            | xhc                                             | Plastid division protein mD                |
| xmt                            | Dihydrodipicolinate dehydrogenase              |            |                              |                                                     |                                            |                                                                       | 2dk                                             | Plastid division protein mE                |
| xan                            | Dihydrodipicolinate acetyltransferase          |            |                              |                                                     | 19. Clp protease                           |                                                                       |                                                 |                                            |
| 2hk                            | Pyruvate carboxylase                           |            |                              |                                                     | xst                                        | Chaperone protein CpnA                                                | 2gd                                             | Chaperone protein CpnB                     |
| xjl                            | Pyruvate phosphate dikinase                    |            |                              |                                                     | 2ms                                        | Adaptor protein ClpB 1                                                | 2mf                                             | Adaptor protein ClpB 2                     |
| 2ls                            | Pyrophosphate-dependent phosphofructo-1-kinase |            |                              |                                                     | xsp                                        | Adaptor protein ClpB 3                                                | -                                               | Proteolytic subunit ClpC                   |
| xnt                            | Phosphoglucose isomerase                       |            |                              |                                                     | xme                                        | Proteolytic subunit ClpC 2                                            | -                                               | Proteolytic subunit ClpC 3                 |
| xdv                            | Beta-glucan synthase                           |            |                              |                                                     | 2cx                                        | Proteolytic subunit ClpC 2                                            | -                                               | Proteolytic subunit ClpC 3                 |
| 4ay                            | Glucan 1,3-beta-glucosidase                    |            |                              |                                                     | 2xh                                        | Proteolytic subunit ClpC 3                                            | -                                               | Proteolytic subunit ClpC 3                 |
| xru                            | Hexose and inose phosphate transporter         |            |                              |                                                     |                                            |                                                                       |                                                 |                                            |

**Figure 5—figure supplement 1.** Reconstructed metabolism pathways and core biological processes in the ancestral ochrophyte plastid. This figure tabulates each of the ancestral ochrophyte HPPGs corresponding to 350 central plastid metabolism and other biological processes. The 'origin' column shows the probable evolutionary source for each HPPG as defined by combined BLAST tophit and single-gene tree analysis. The origin of each ancestral HPPG is either assigned a 'high confidence' value (in which the same origin was robustly supported both by single-gene tree and by BLAST tophit analysis) or a 'low confidence' value (in the absence of robust and consistent support through both techniques; corresponding to the tree sister-group if one could be clearly assigned, or the BLAST tophit identity if not). A dash indicates the corresponding protein was not identified in the ancestral HPPG dataset due to either being plastid-encoded or alternative reasons; detailed explanations for the enzymes that are neither plastid-encoded nor detected in the ancestral HPPG dataset are provided in **Figure 5—figure supplement 2**.

DOI: [10.7554/eLife.23717.022](https://doi.org/10.7554/eLife.23717.022)

| Enzyme                                              | Pathway                   | Distribution              | Probable explanation                                                                       | References                              |
|-----------------------------------------------------|---------------------------|---------------------------|--------------------------------------------------------------------------------------------|-----------------------------------------|
| Sedoheptulose-bis-phosphatase                       | CBB cycle                 | Multiple isoforms         | Functionally conserved, but with different LGT events in different ochrophyte lineages     | Fig. supplement 3                       |
| Transaldolase                                       | CBB cycle                 | Hypogyristera and diatoms | Functionally complemented by sedoheptulose-bis-phosphatase/ fructose-bisphosphate aldolase | Kroth et al., 2008                      |
| Isopropylmalate dehydrogenase                       | Leucine biosynthesis      | Multiple isoforms         | Functionally conserved, but with different LGT events in different ochrophyte lineages     | Fig. supplement 4                       |
| 3-dehydroquinate synthase                           | Shikimate biosynthesis    | Multiple isoforms         | Functionally conserved, but with different LGT events in different ochrophyte lineages     | Fig. supplement 5                       |
| Shikimate kinase                                    | Shikimate biosynthesis    | Multiple isoforms         | Functionally conserved, but with different LGT events in different ochrophyte lineages     | Fig. supplement 6                       |
| APS kinase                                          | Fe-S cluster biosynthesis | Not found                 | Functionally dispensible; may be complemented by PAPS reductase                            | Gutierrez-Marcos et al. 1996            |
| Magnesium protoporphyrin IX methylmonoester cyclase | Chlorophyll biosynthesis  | Not found                 | Not known to be essential for chlorophyll metabolism outside of green lineage              | Tanaka and Tanaka 2007                  |
| Isopentenyl diphosphate isomerase                   | Carotenoid biosynthesis   | Not found                 | Dispensible for isoprenoid metabolism                                                      | Ershov et al. 2000; Rohdich et al. 2002 |
| rps15                                               | Ribosomal small subunit   | Not found                 | Not known outside of green lineage                                                         | Green 2011                              |

**Figure 5—figure supplement 2.** Core plastid metabolism proteins not identified within the ancestral HPPG dataset.  
[DOI: 10.7554/eLife.23717.023](https://doi.org/10.7554/eLife.23717.023)



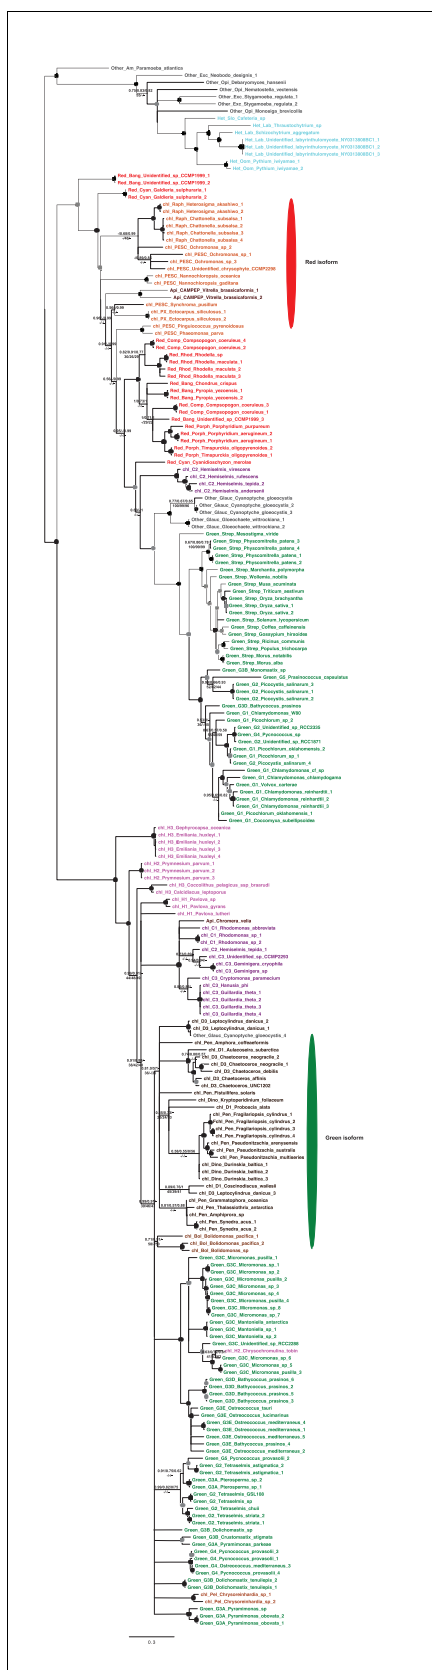

**Figure 5—figure supplement 3.** Tree of ochrophyte sedoheptulose- 7-bisphosphatase sequences. This figure shows the consensus Bayesian topology inferred for a 218 taxa x 303 aa alignment of sedoheptulose-7-bisphosphatase sequences, shown as per **Figure 2—figure supplement 2**. Two different **Figure 5—figure supplement 3 continued on next page**

Figure 5—figure supplement 3 continued

ochrophyte plastid isoforms- one restricted to chrysista, and of probable red algal origin, and one found in hypogyrstea and diatoms, of probable green algal origin- are shown respectively by red and green ellipses.

DOI: [10.7554/eLife.23717.024](https://doi.org/10.7554/eLife.23717.024)

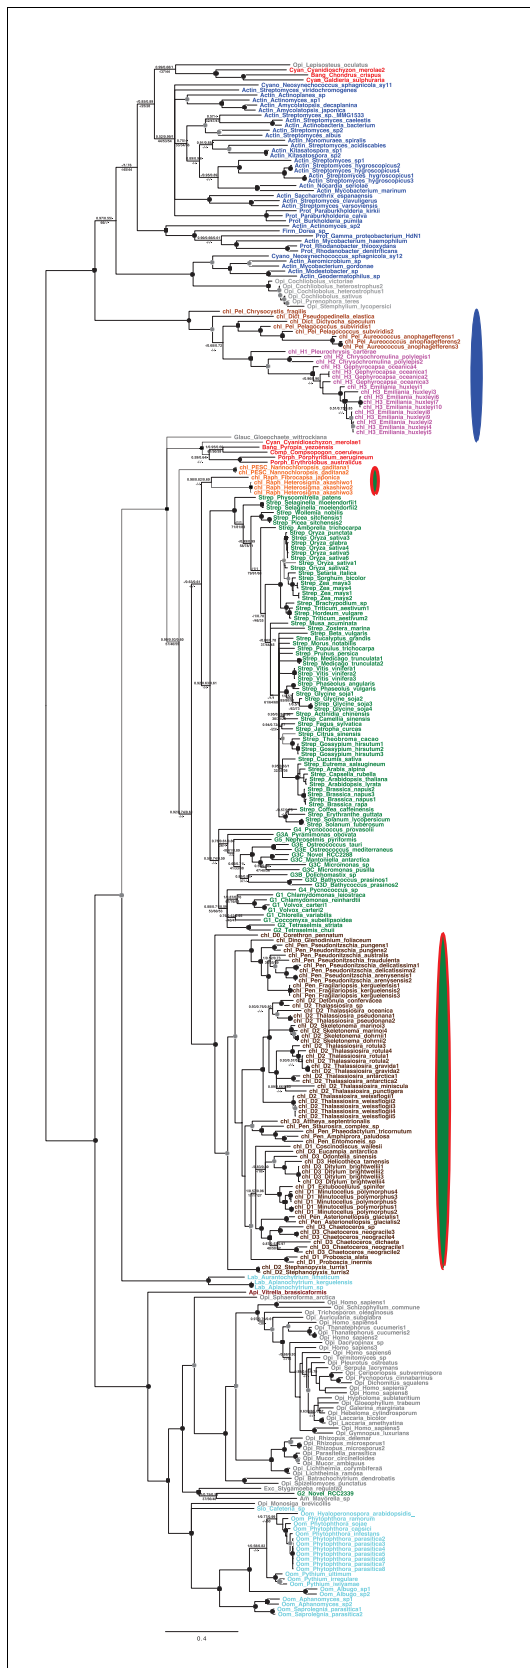

**Figure 5—figure supplement 4.** Tree of ochrophyte 3-dehydroquinate synthase sequences. This figure shows the consensus Bayesian topology inferred for a 324 taxa x 387 aa alignment of 3-dehydroquinate synthase, shown as per **Figure 2—figure supplement 2**. Three ochrophyte plastid

Figure 5—figure supplement 4 continued on next page

Figure 5—figure supplement 4 continued

isoforms are shown with coloured ellipses: a probable bacterial isoform restricted to pelagophytes and dictyochophytes (blue ellipse), and two isoforms of ambiguous red/ green origin found respectively in raphidophytes and eustigmatophytes, and in diatoms (green ellipses with red borders).

DOI: [10.7554/eLife.23717.025](https://doi.org/10.7554/eLife.23717.025)

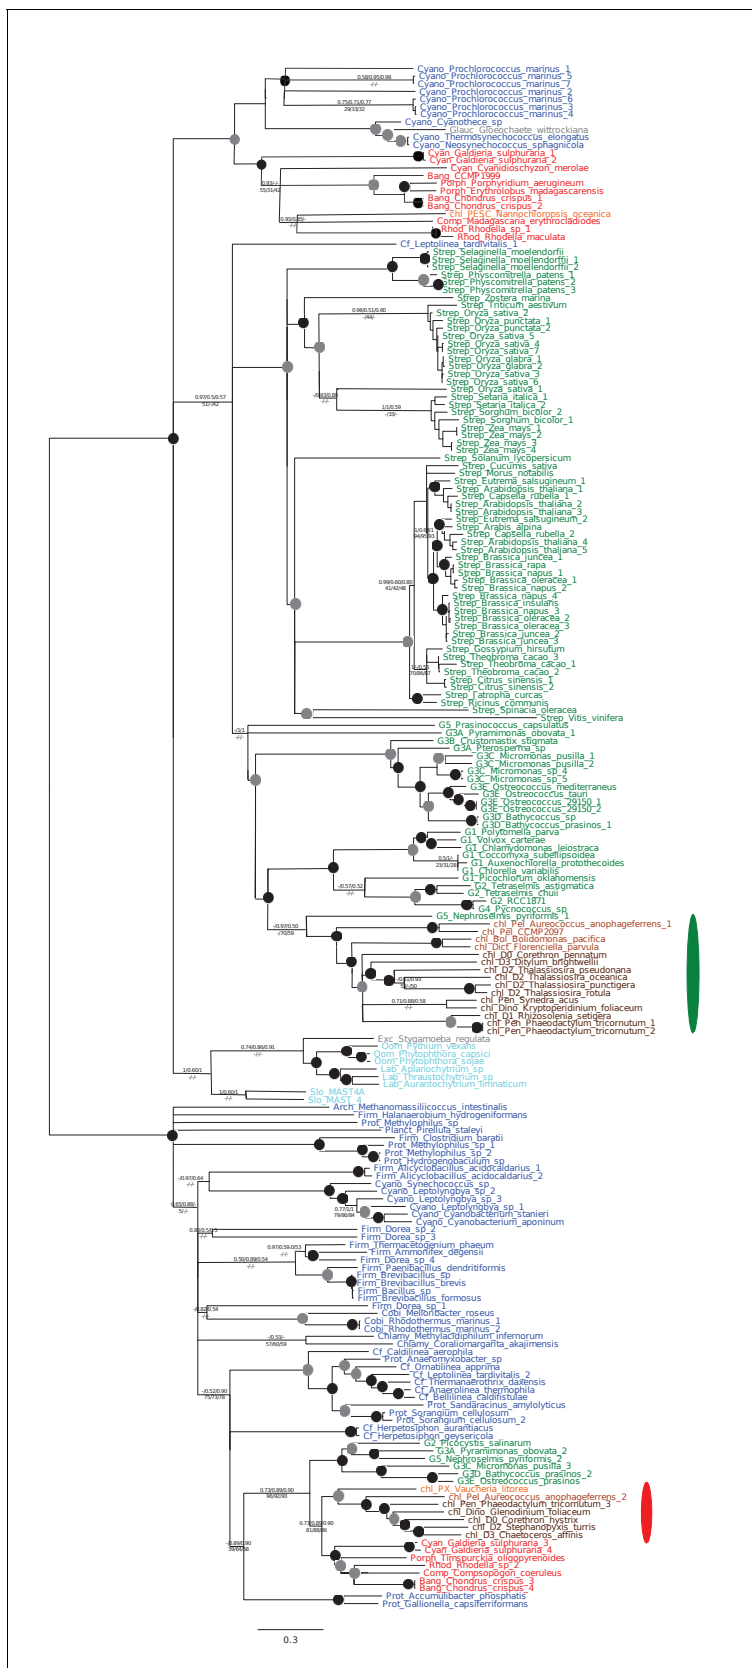

**Figure 5—figure supplement 5.** Tree of ochrophyte isopropylmalate dehydrogenase sequences. This tree shows the consensus Bayesian phylogeny inferred for a 202 taxa x 592 aa alignment of isopropyl malate dehydrogenase sequences, shown as per **Figure 2—figure supplement 2**. Two

*Figure 5—figure supplement 5 continued on next page*

Figure 5—figure supplement 5 continued

ochrophyte plastid isoforms are shown with coloured ellipses: an isoform of green algal origin restricted to diatoms and hypogyrstea (green ellipse), and a red algal isoform found in diatoms, pelagophytes and xanthophytes (red ellipse).

DOI: [10.7554/eLife.23717.026](https://doi.org/10.7554/eLife.23717.026)

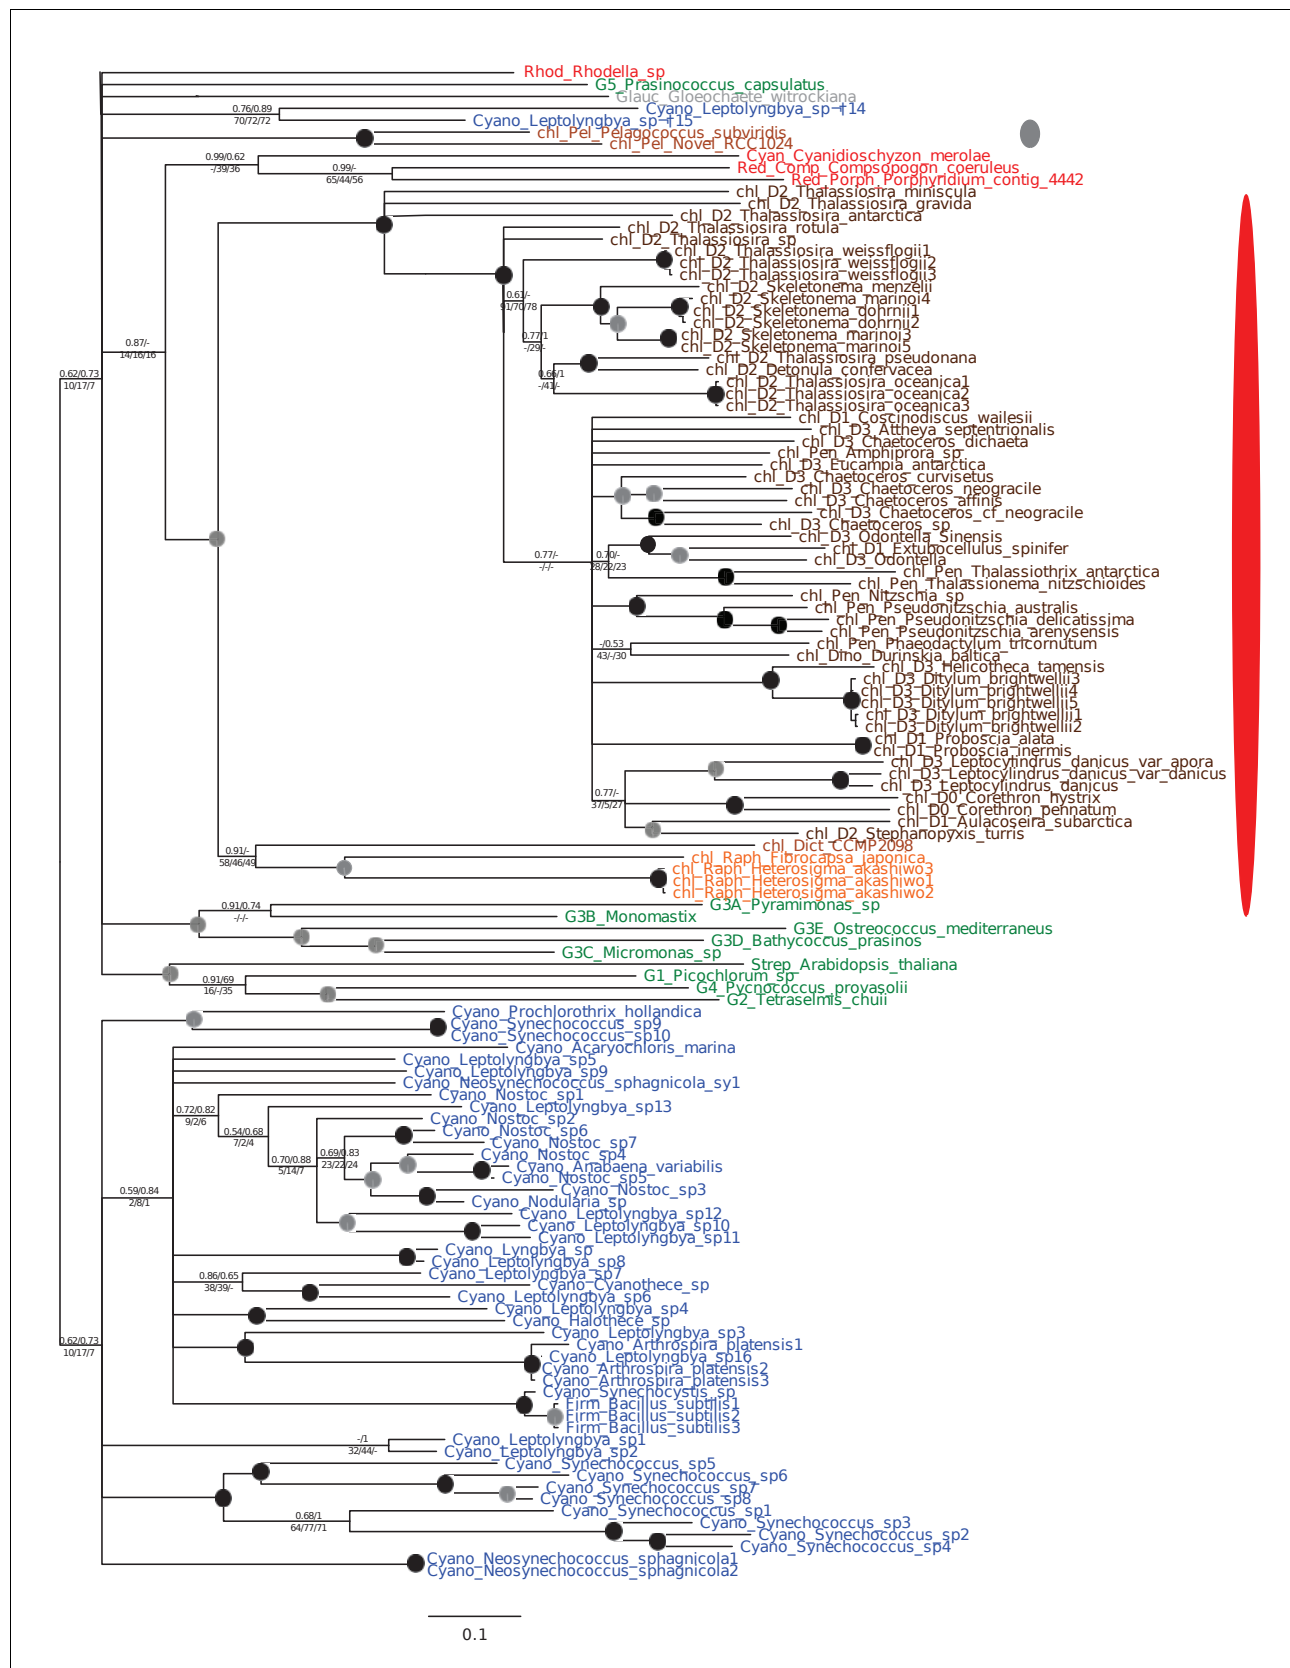

**Figure 5—figure supplement 6.** Tree of ochrophyte shikimate kinase sequences. This figure shows the consensus Bayesian topology inferred for a 127 taxa x 262 aa alignment of shikimate kinase sequences. The WAG Bayesian topology was excluded from the consensus due to non-convergence

Figure 5—figure supplement 6 continued on next page

Figure 5—figure supplement 6 continued

between the two chains, hence the tree is produced from the consensus of GTR and Jones substitution matrices only, but is otherwise presented identically to **Figure 2—figure supplement 2**. Two distinct ochrophyte plastid isoforms are shown with coloured ellipses: a green algal isoform conserved across diatoms, dictyochophytes and raphidophytes (red ellipse), and a pelagophyte isoform of uncertain origin (grey ellipse).

DOI: [10.7554/eLife.23717.027](https://doi.org/10.7554/eLife.23717.027)



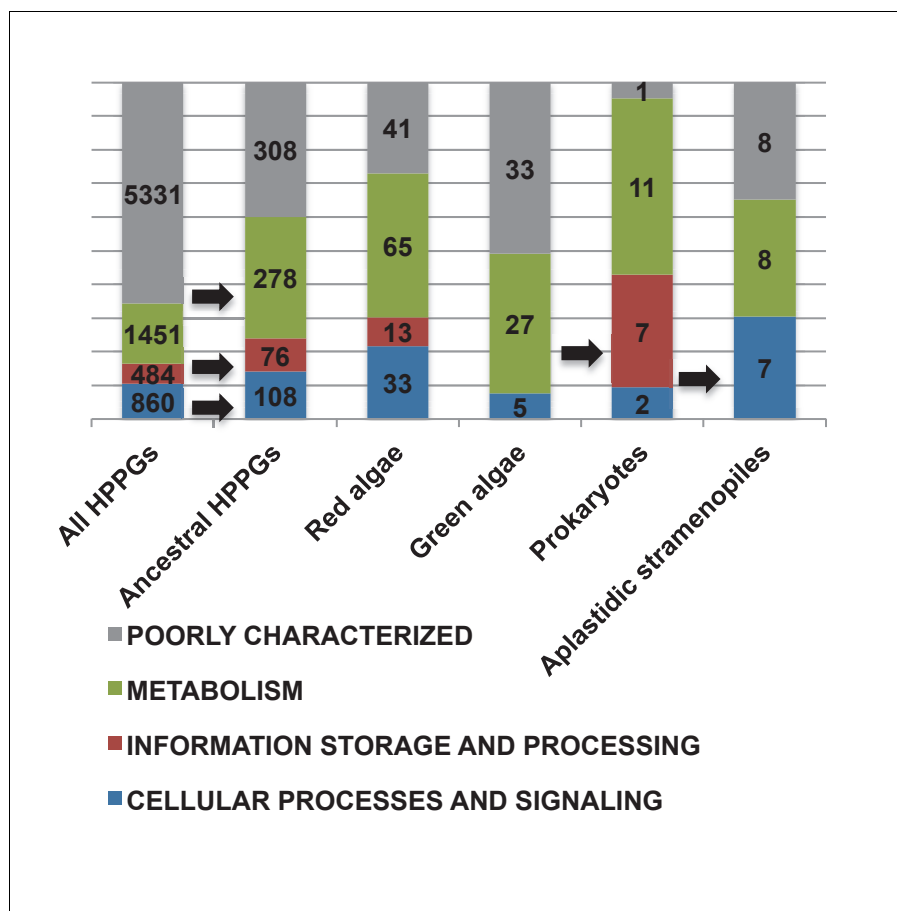

**Figure 5—figure supplement 7.** KOG classes associated with different categories of HPPGs. These pie charts profile the distribution of different KOG classes across (i) all HPPGs except for those with general function predictions only, or without any clear KOG function, (ii) the same, but restricted to ancestral HPPGs and (iii) the same, for ancestral HPPGs of unambiguous red, green, prokaryotic and aplastidic stramenopile origin as identified by combined BLAST top hit and single-gene tree analysis. KOG classes that occur at elevated frequency in the ancestral HPPG dataset compared to the complete HPPG dataset, and one KOG class enriched in the prokaryotic HPPG dataset compared to the ancestral HPPG dataset (chi-squared test,  $p < 0.05$ ) are labelled with horizontal arrows.

DOI: [10.7554/eLife.23717.028](https://doi.org/10.7554/eLife.23717.028)

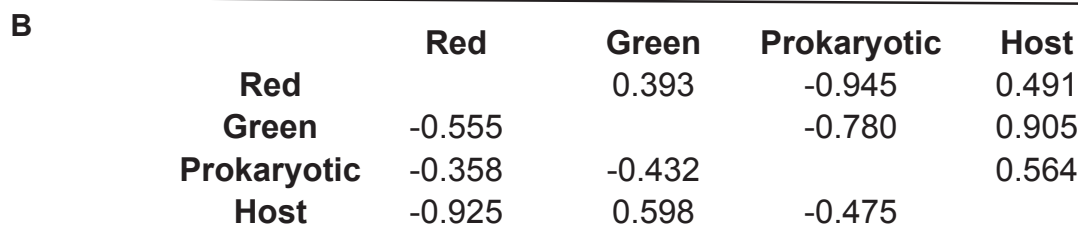Dorrell et al. eLife 2017;6:e23717. DOI: [10.7554/eLife.23717](https://doi.org/10.7554/eLife.23717)

Figure 5—figure supplement 8 continued

an ancestral HPPG member of red origin, and the other an ancestral HPPG member of green origin. None of the P values calculated are significant, i.e. there are no categories of ancestral HPPG in which the internal correlation coefficients of gene expression are any different to those observed across the dataset as a whole.

DOI: [10.7554/eLife.23717.029](https://doi.org/10.7554/eLife.23717.029)



Figure 5—figure supplement 9 continued

of different evolutionary origin (Panel A, boxplot iv; Panel B, bottom row) reveals no specific difference in the pairwise correlation values observed between genes encoding ancestral HPPGs of host origin, and genes encoding ancestral HPPGs of all other origins within the dataset.

DOI: [10.7554/eLife.23717.030](https://doi.org/10.7554/eLife.23717.030)

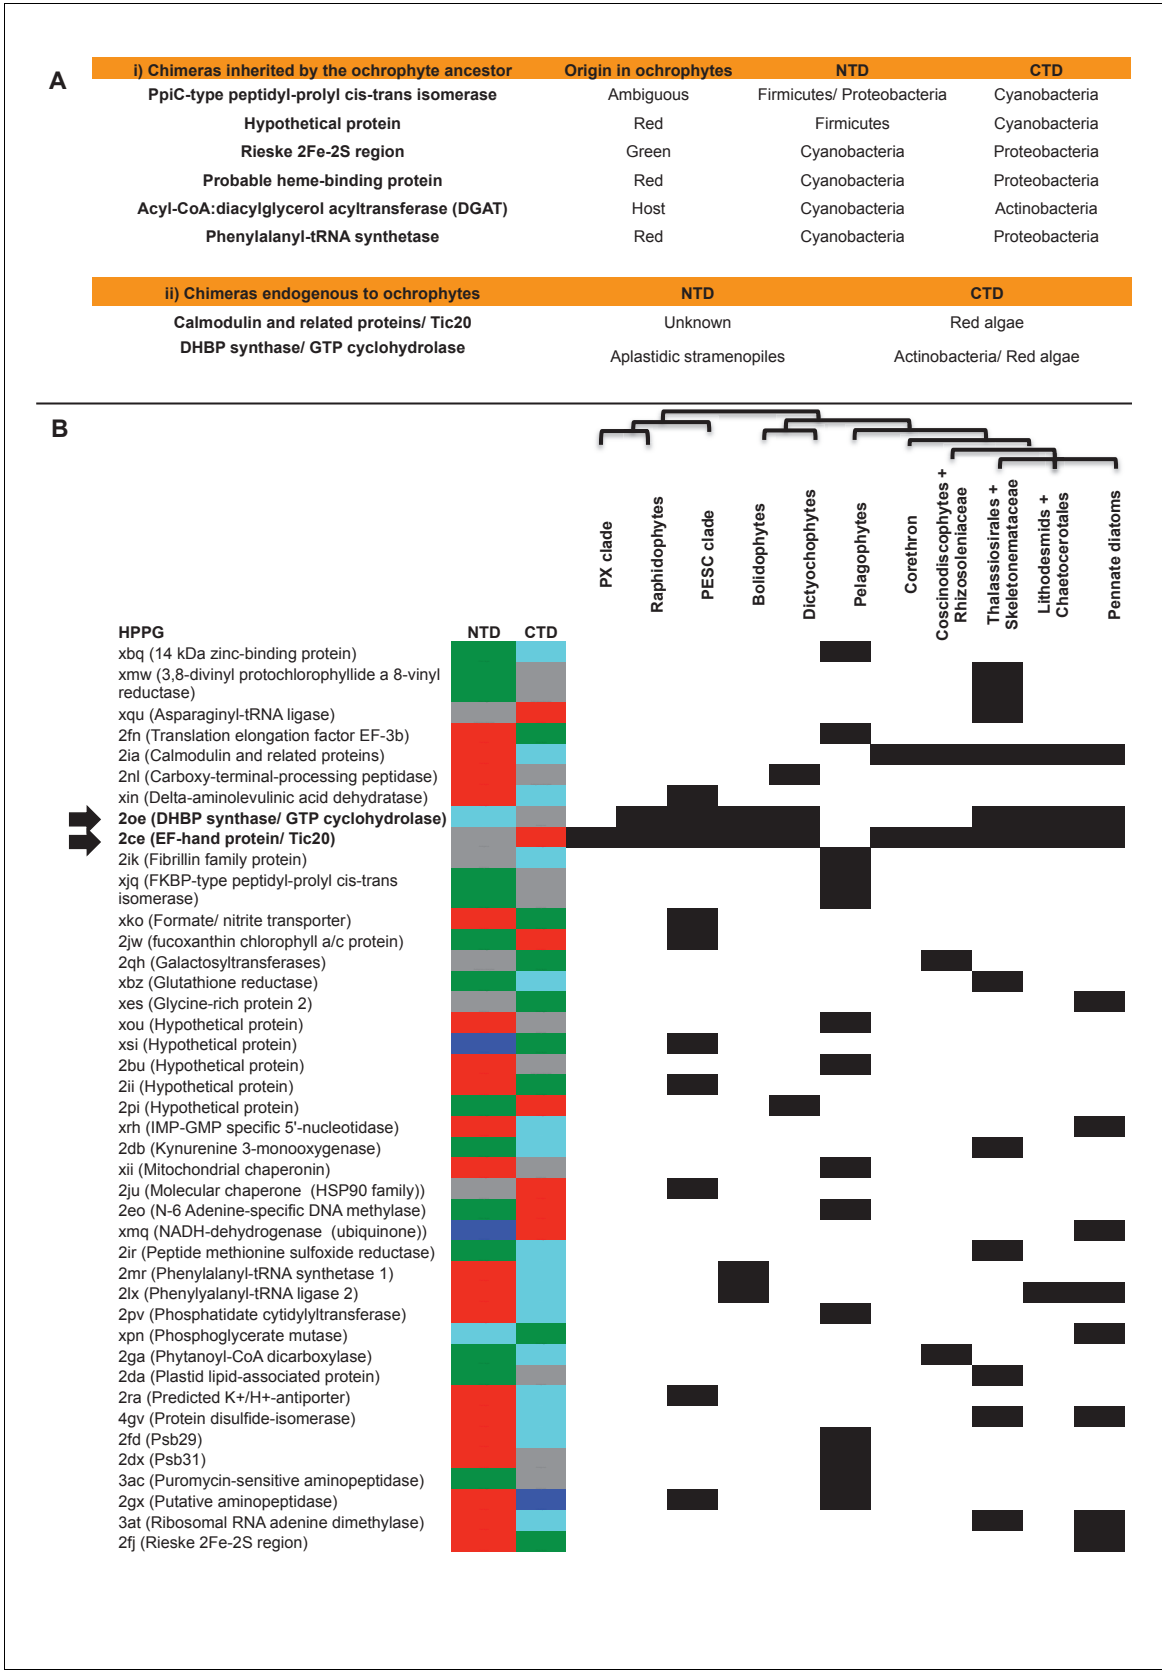

**Figure 6.** Origins of chimeric proteins in the ochrophyte plastid. (Panel A) tabulates eight ancestral HPPGs containing domains of cyanobacterial and non-cyanobacterial origin, as previously identified (Méheust et al., 2016) that were inherited by the ochrophyte plastid, and two chimeric ancestral

Figure 6 continued on next page

*Figure 6 continued*

HPPGs which are probably of specific ochrophyte origin. (Panel B) shows a complete tabulated list of all ancestral HPPGs (listed by identifier, with the predicted function given in brackets) in which at least one chimerism event between domains of red algal, green algal, aplastidic stramenopile, other eukaryotic, and prokaryotic origin was detected. In each case, the inferred evolutionary origins of the N-terminal (NTD) and C-terminal (CTD) components of the chimeric members of the HPPG are given, according to the colour key within the figure, followed by its distribution across all ochrophyte lineages. The two chimeric HPPGs inferred to have arisen in the ochrophyte ancestor are shown in bold text and labelled with horizontal arrows. Exemplar alignments and phylogenies of the two chimeric proteins inferred to have originated in the ochrophyte ancestor are shown in

**Figure 6—figure supplements 1–3.**

DOI: [10.7554/eLife.23717.031](https://doi.org/10.7554/eLife.23717.031)

## A) i) Full sequence length

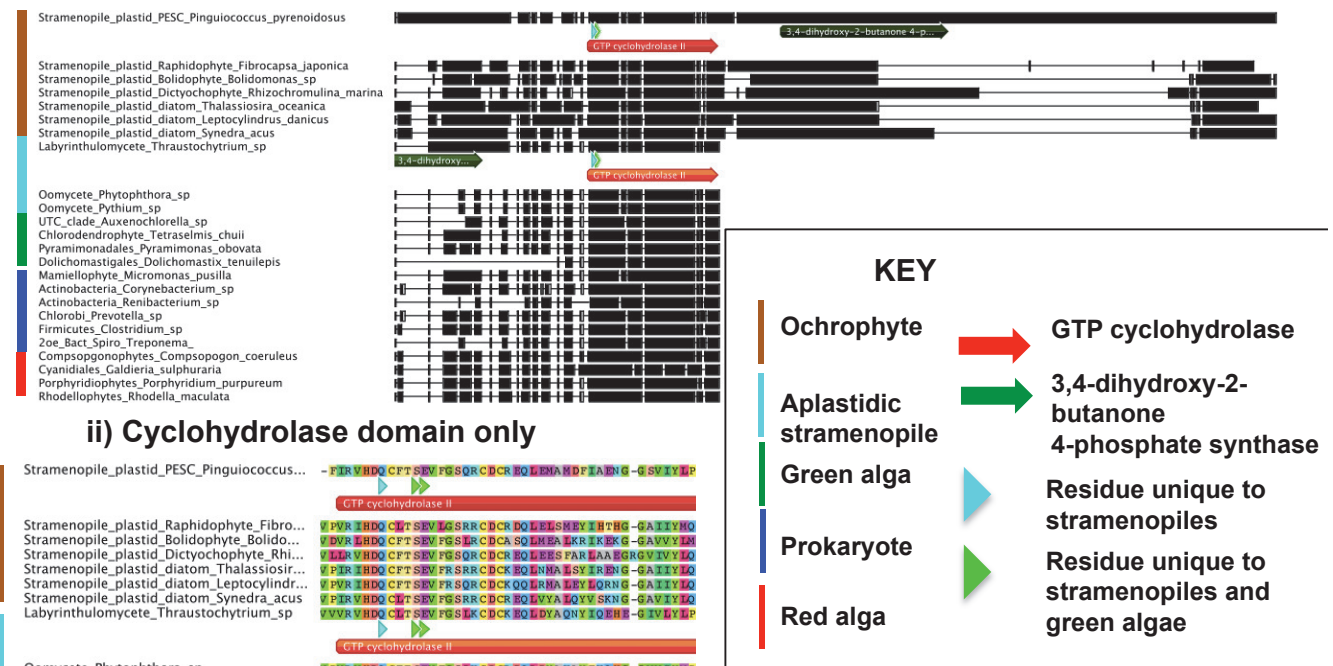

**Figure 6—figure supplement 1.** Alignments of an ochrophyte-specific riboflavin biosynthesis fusion protein. (Panel A) shows alignments of the full length (i) and cyclohydrolase domain only (ii) of a plastid-targeted GTP cyclohydrolase II/3,4-dihydroxy-2-butanone 4-phosphate synthase protein conserved across the ochrophytes. Coloured bars adjacent to each sequence correspond to the evolutionary origin of the sequence. The cyclohydrolase domain of the ochrophyte protein is positioned in the N-terminal region, and the synthase domain in the C-terminal region. Three uniquely shared residues at the N-terminus of the cyclohydrolase domain confirm that it has been inherited from the aplastidic stramenopile ancestor of the ochrophytes.

DOI: [10.7554/eLife.23717.032](https://doi.org/10.7554/eLife.23717.032)



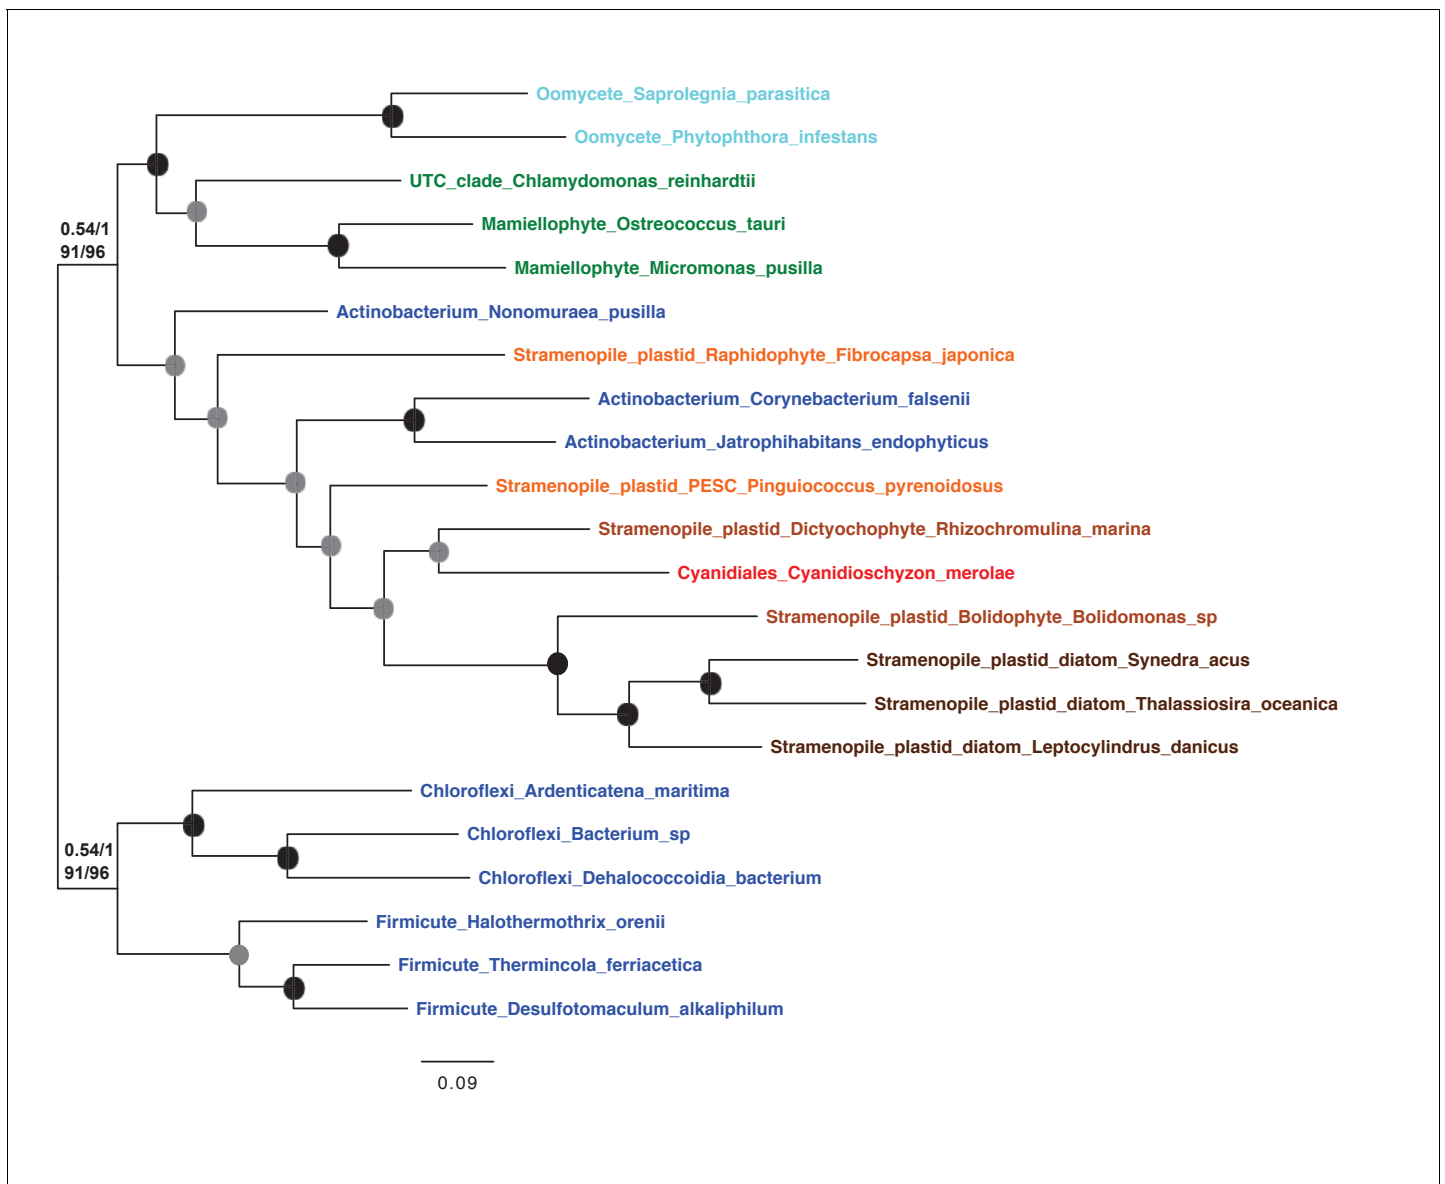

**Figure 6—figure supplement 2.** Origins of ochrophyte plastid 3,4-dihydroxy-2-butanone 4-phosphate synthase. This figure shows the consensus Bayesian topology inferred for a 22 taxa x 206 aa alignment of 3,4-dihydroxy-2-butanone 4-phosphate synthase domains from different lineages, inferred using Jones and WAG matrices, and shown as per **Figure 2—figure supplement 2**. The ochrophyte plastid isoforms branch with red algal and actinobacterial sequences.

DOI: [10.7554/eLife.23717.033](https://doi.org/10.7554/eLife.23717.033)

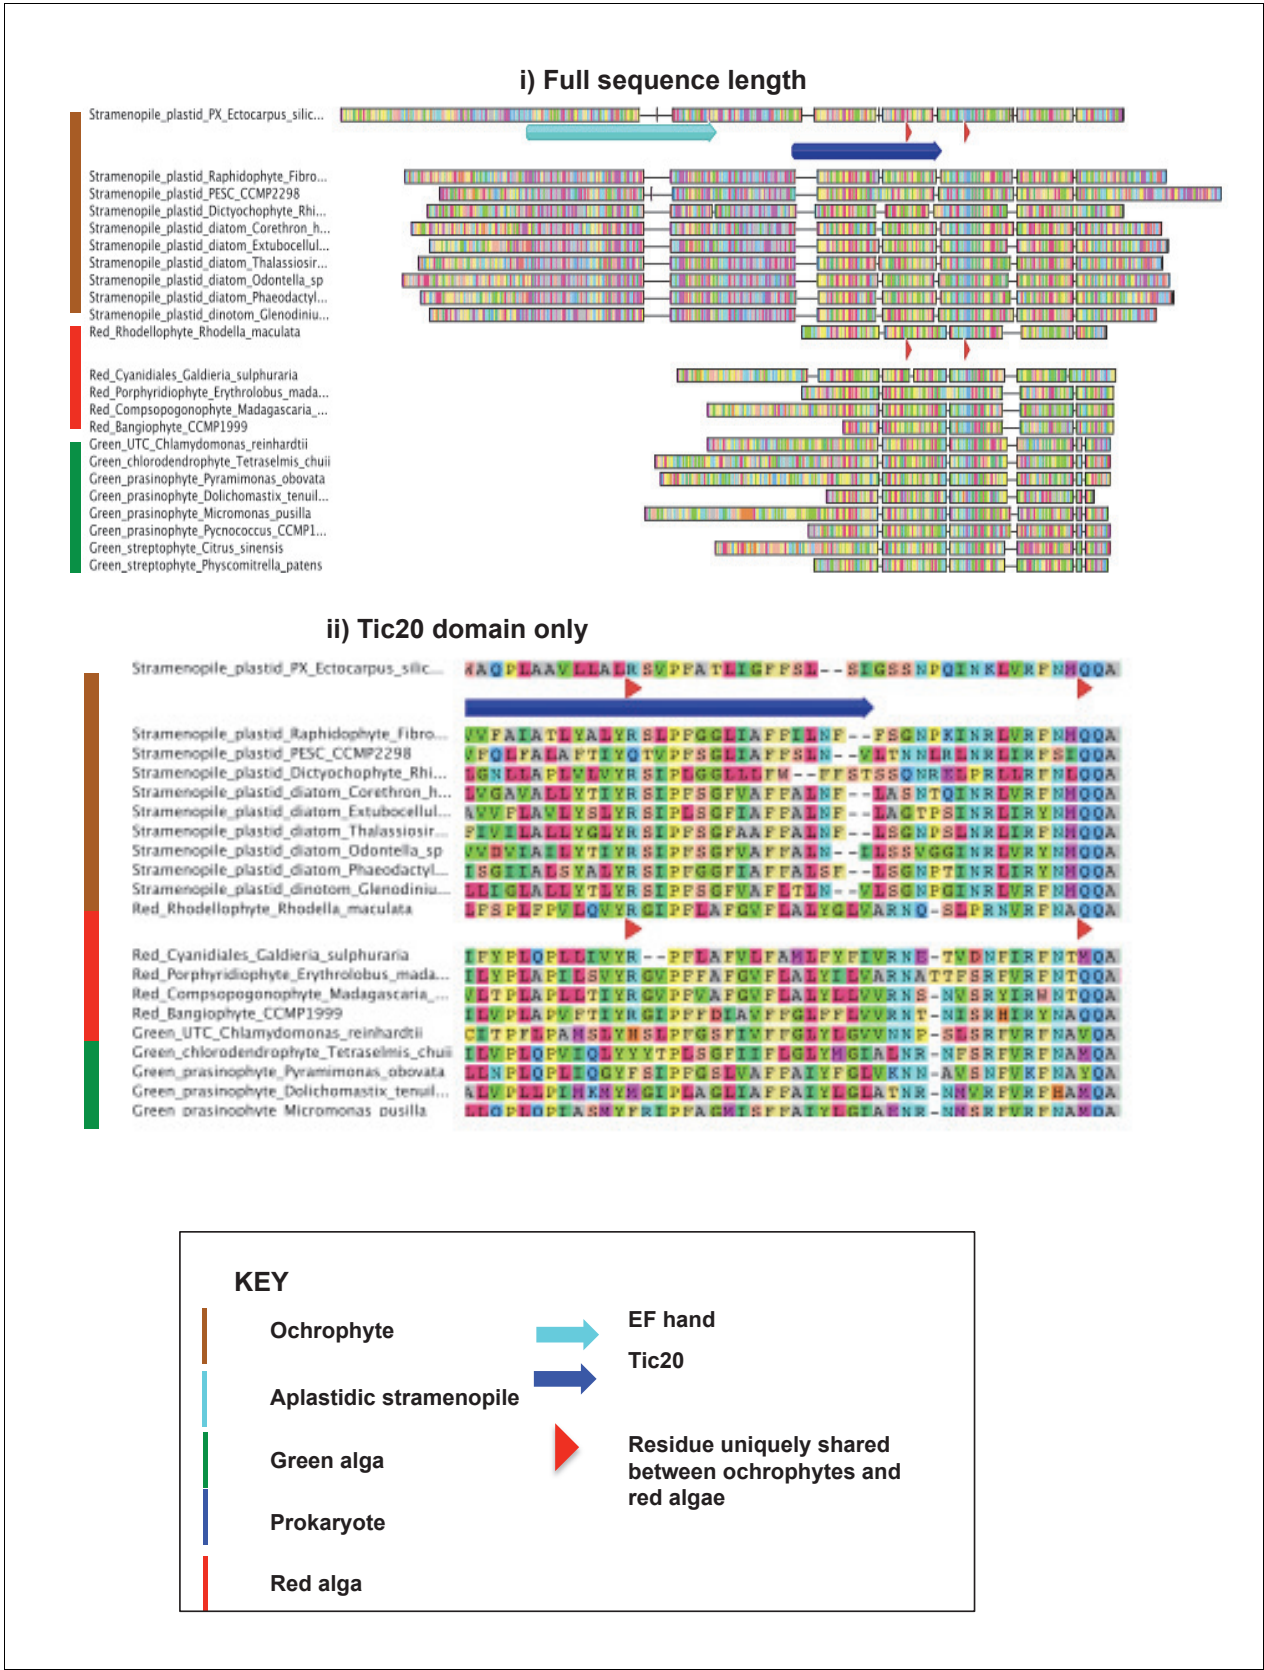

**Figure 6—figure supplement 3.** An ochrophyte-specific Tic20 fusion protein. This figure shows alignments of the full length (i) and conserved region only (ii) of plastid Tic20 sequences, displayed as per **Figure —figure supplement 1**.  
Figure 6—figure supplement 3 continued on next page

Figure 6—figure supplement 3 continued

DOI: [10.7554/eLife.23717.034](https://doi.org/10.7554/eLife.23717.034)

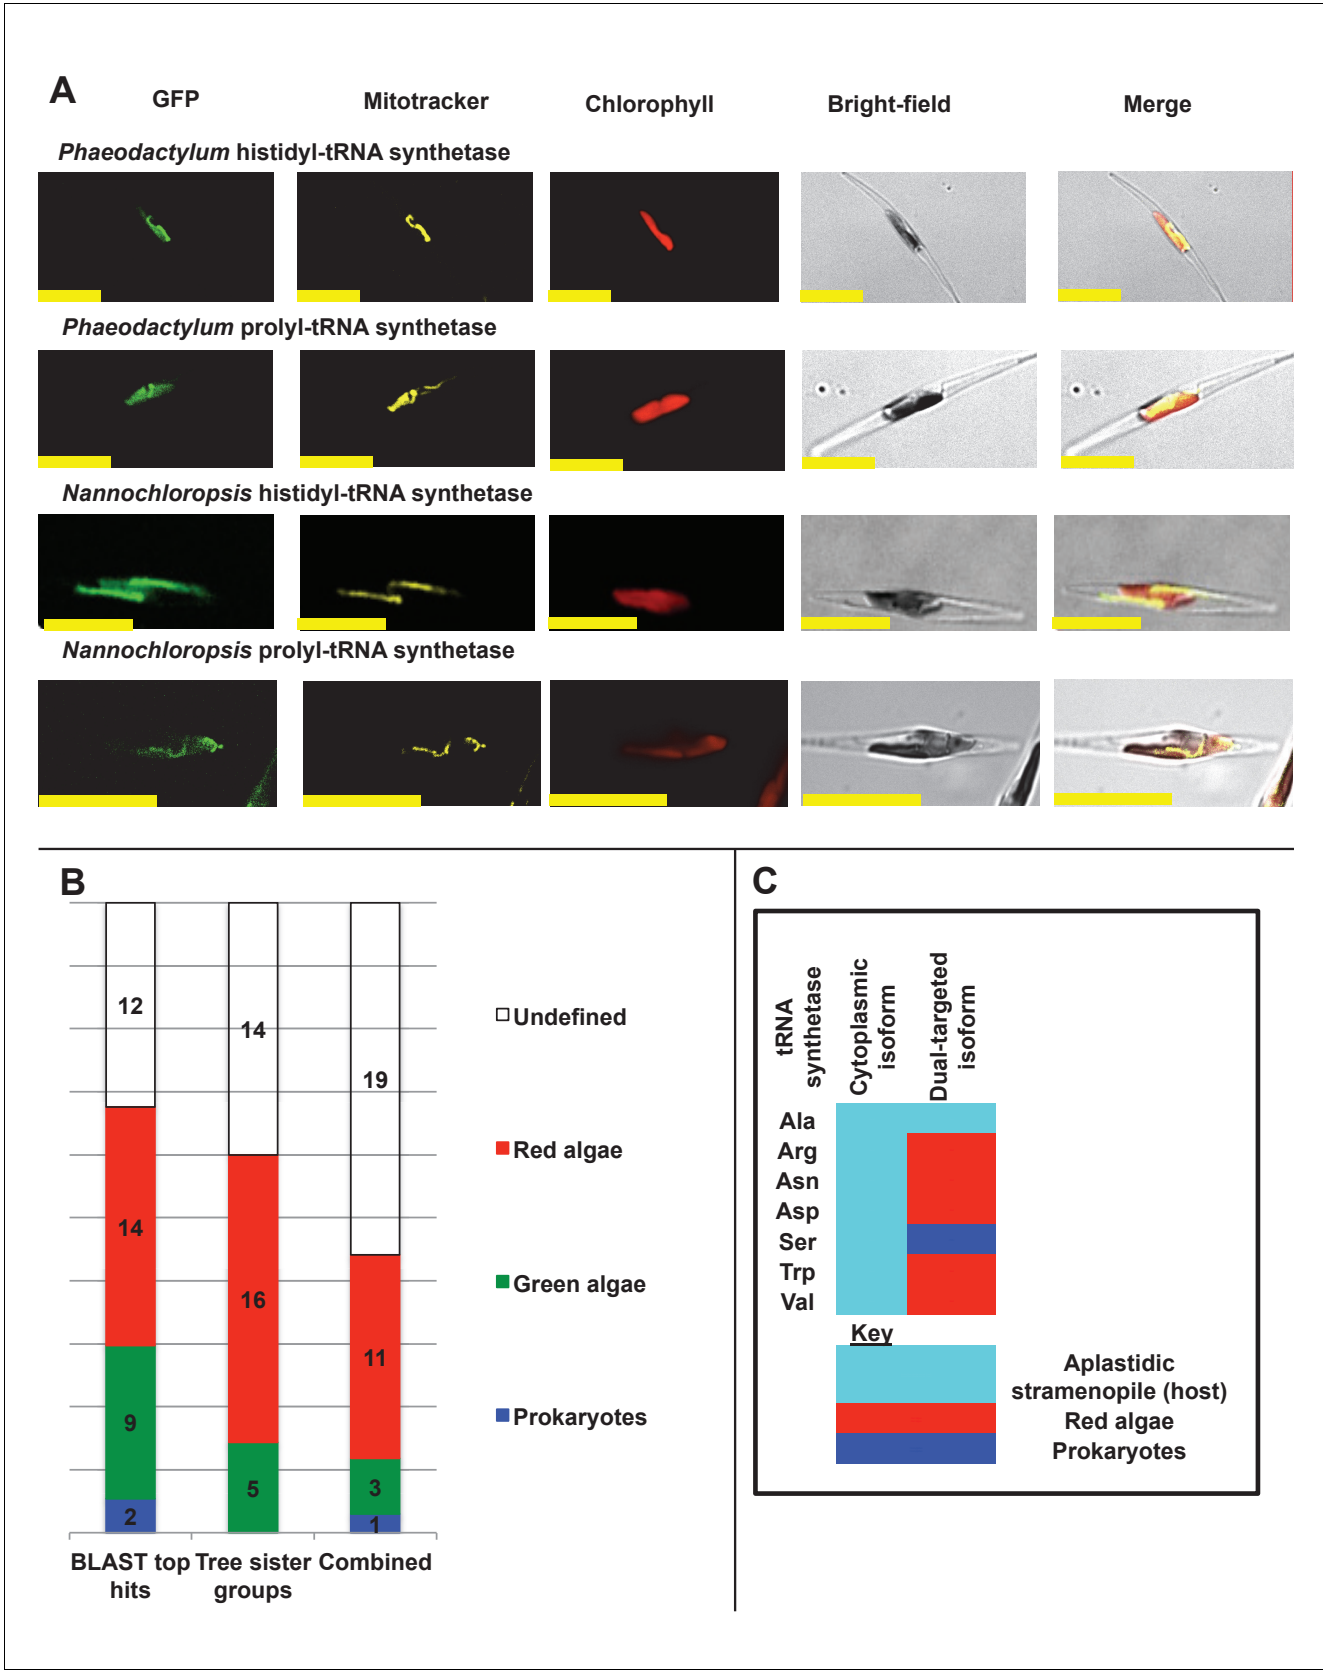

**Figure 7.** Ancient and bidirectional connections between the ochrophyte plastid and mitochondria. (Panel A) shows Mitotracker-Orange stained *P. tricornutum* lines expressing GFP fusion constructs for the N-terminal regions of histidyl- and prolyl-tRNA synthetase sequences from *P. tricornutum* and *Nannochloropsis*. *Figure 7 continued on next page*

## Figure 7 continued

the eustigmatophyte *Nannochloropsis gaditana*. Targeting constructs for an additional four dual-targeted proteins in *P. tricornutum* and one dual-targeted protein in *G. foliaceum*, alongside Mitotracker-negative and wild type control images, are shown in **Figure 7—figure supplement 1**. (Panel B) profiles the predicted evolutionary origins of the 34 ancestral dual-targeted HPPGs, as inferred by BLAST top hit and single-gene tree analysis. Data supporting the thresholds used to identify probable dual-targeted HPPGs in silico are supplied in **Figure 7—figure supplement 2**. (Panel C) shows seven classes of tRNA synthetase for which only two copies were inferred in the genome of the last common ochrophyte ancestor. Evolutionary origins are inferred from combined BLAST top hit and single-gene tree analysis for dual-targeted proteins, and from BLAST top hit analysis alone for cytoplasmic proteins. In five cases the dual-targeted isoform is inferred to be of ultimate red algal origin, indicating that a protein derived from the endosymbiont has functionally replaced the endogenous host mitochondria-targeted copy.

DOI: [10.7554/eLife.23717.035](https://doi.org/10.7554/eLife.23717.035)

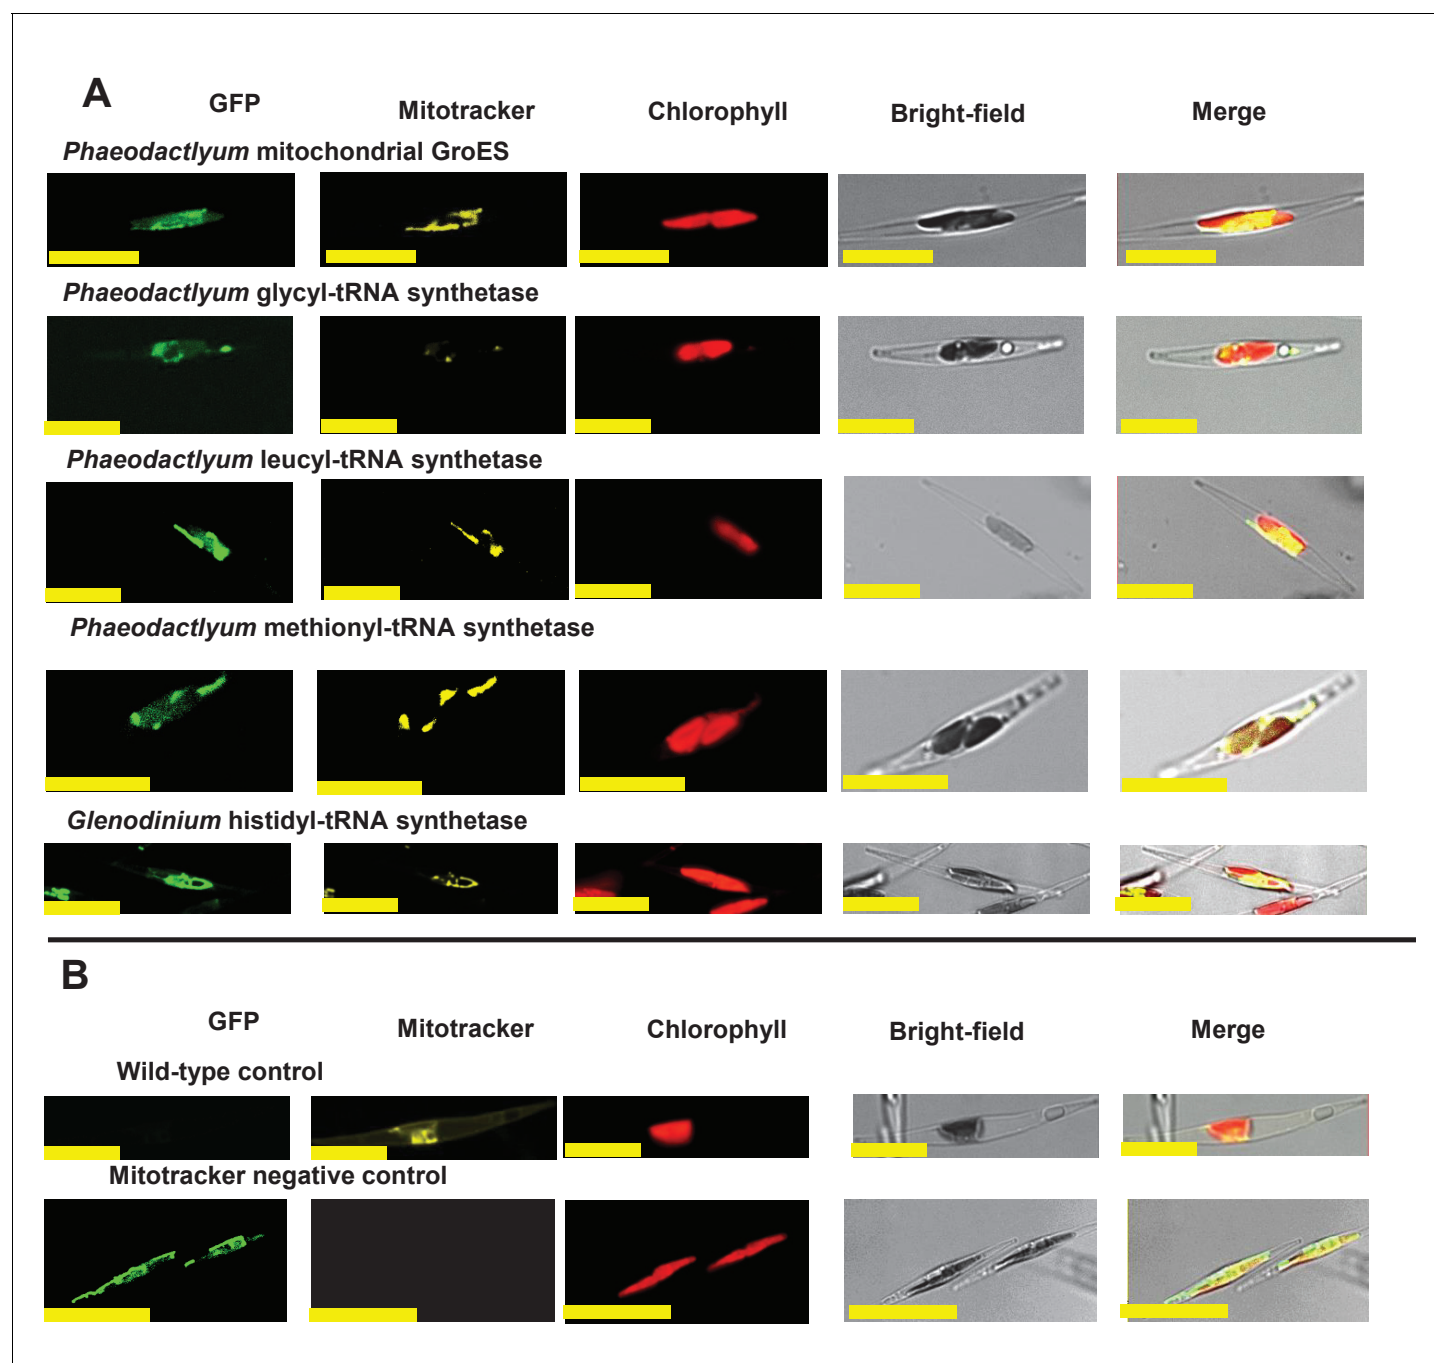

**Figure 7—figure supplement 1.** Experimental verification of additional ochrophyte dual-targeted proteins. (Panel A) shows Mitotracker-orange stained *Phaeodactylum tricornutum* lines expressing four additional dual-targeted proteins (glycyl-, leucyl-, and methionyl-tRNA synthetases, and a predicted mitochondrial GroES-type chaperone) from *Phaeodactylum tricornutum*, and a dual-targeted histidyl-tRNA synthetase from *Glenodinium foliaceum*. (Panel B) shows control images that confirm an absence of crosstalk between GFP and Mitotracker: wild-type *Phaeodactylum* cells stained with Mitotracker, and cells expressing the *Glenodinium* histidyl-tRNA synthetase–GFP fusion construct and visualised with the Mitotracker laser and channel in the absence of Mitotracker stain.

DOI: [10.7554/eLife.23717.036](https://doi.org/10.7554/eLife.23717.036)

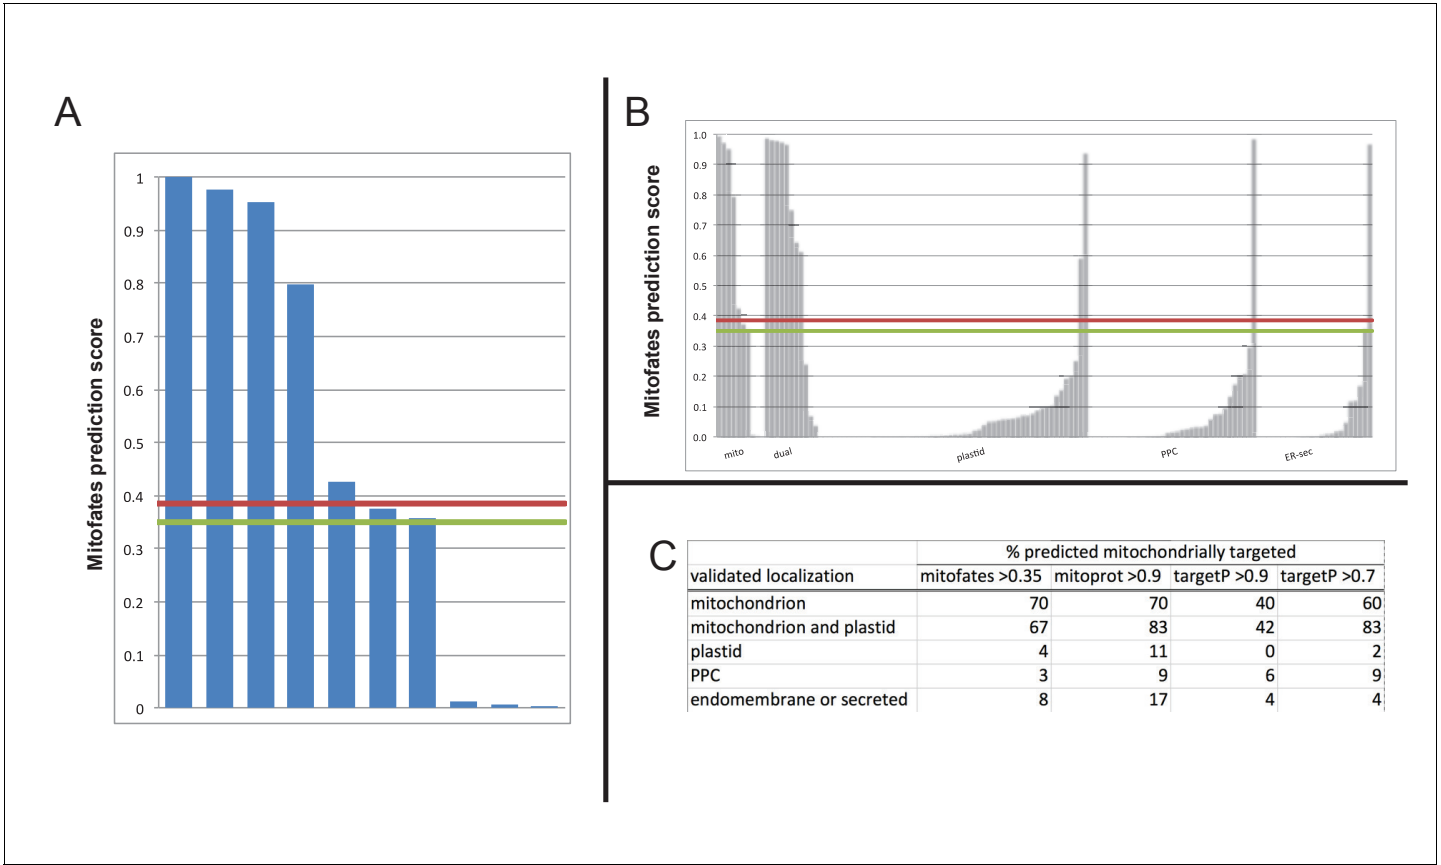

**Figure 7—figure supplement 2.** Comparison of different in silico targeting prediction programmes for the identification of dual-targeted ochrophyte proteins. (Panel A) shows Mitofates scores for ochrophyte proteins verified experimentally to be dual-targeted in this and a previous study (Gile et al., 2015). (Panel B) shows Mitofates scores for all ochrophyte proteins for which a subcellular localisation has been identified in previous studies. The red lines in each graph show the Mitofates default cutoff (0.385) and the green lines indicate our chosen cutoff (0.35). (Panel C) compares different in silico targeting prediction algorithms with respect to predicted mitochondrial localization by experimentally validated localization. Mitofates strikes the best balance between high true positives and low false positives.

DOI: 10.7554/eLife.23717.037

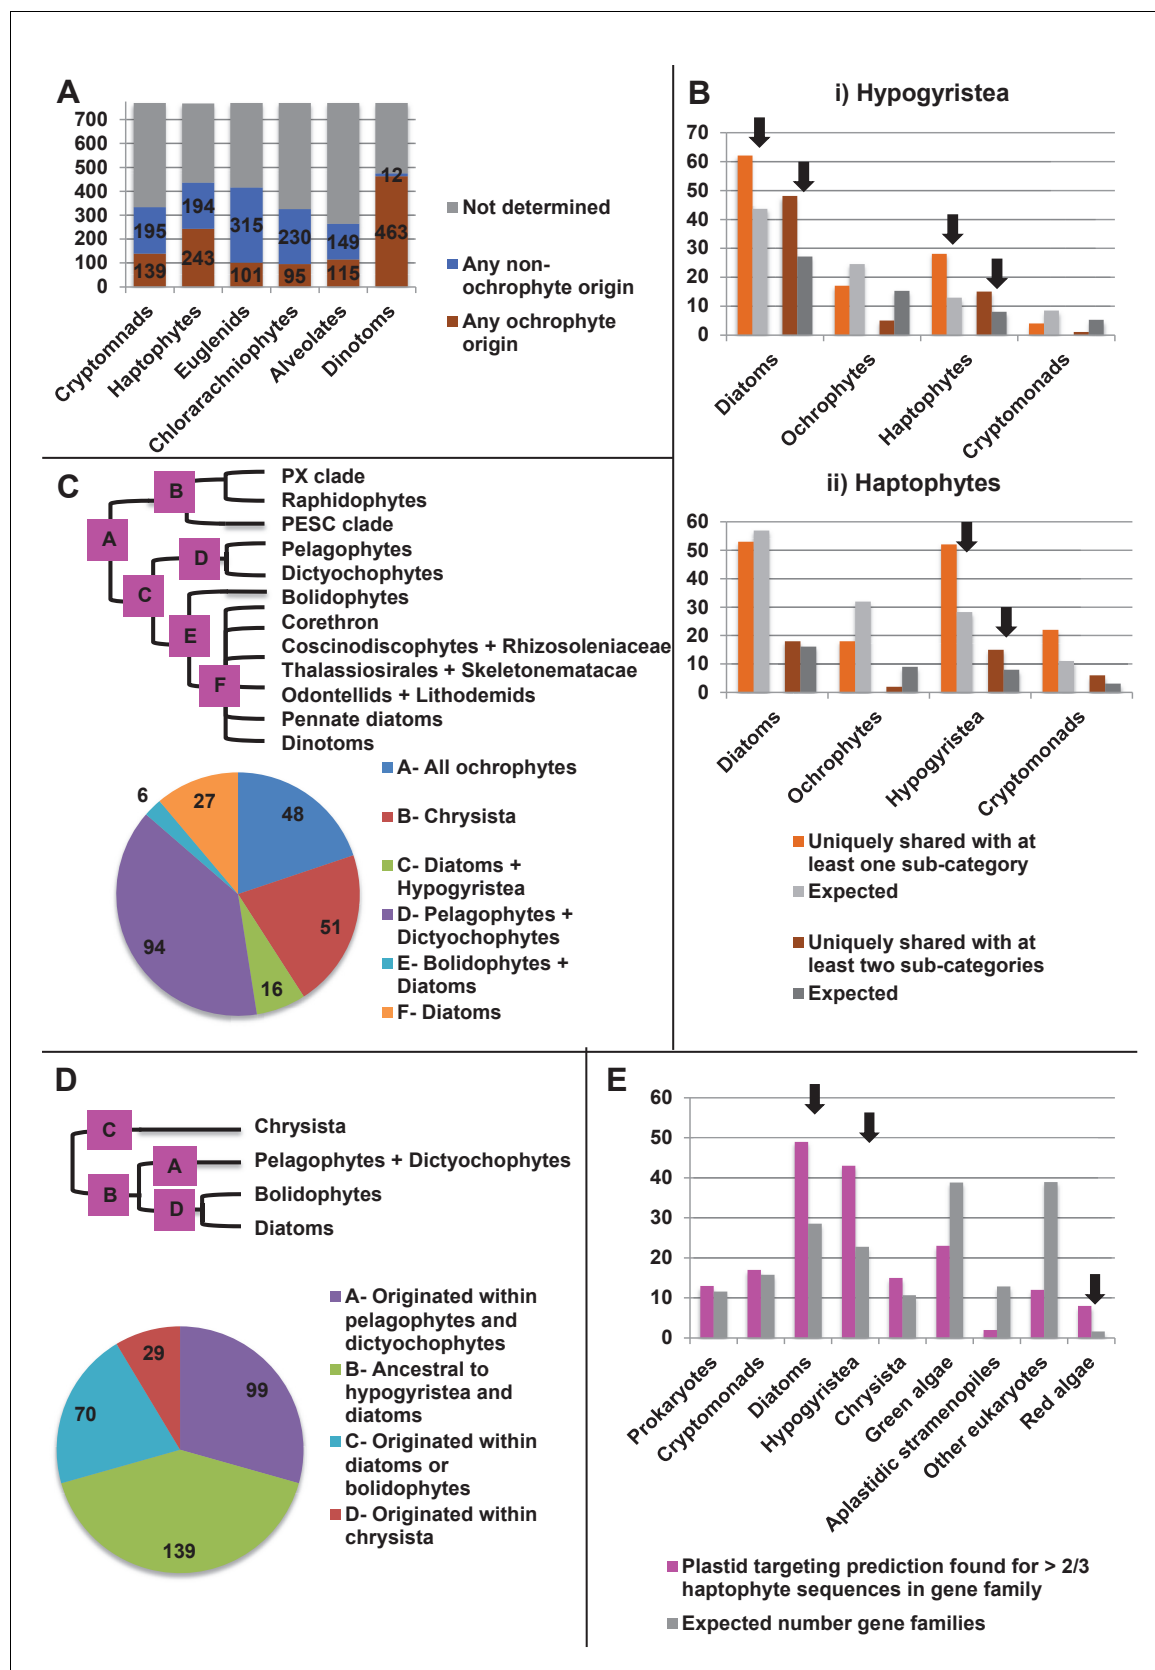

**Figure 8.** Footprints of an ancient endosymbiosis in the haptophyte plastid proteome. (Panel A) indicates the number of ancestral ochrophyte HPPGs that included sequences from other algal lineages in single-gene tree analyses, and whether those algal lineages branched within or external to

Figure 8 continued on next page



*Figure 8 continued*

ochrophytes. An overview of the specific origins of proteins of ochrophyte origin in each lineage is shown in **Figure 8—figure supplement 1**. (Panel B) compares the number of ASAFind-derived HPPGs that are uniquely shared between hypogyrisea (i) or haptophytes (ii) and one other CASH lineage. Values are given for proteins found in a majority of sub-categories in hypogyrisea/ haptophytes and at least one sub-category from only one other lineage (light bars), and proteins found in a majority of sub-categories in hypogyrisea/ haptophytes and a majority of sub-categories from only one other lineage (dark bars). Values that are significantly greater than would be expected through random distribution are labelled with black arrows. (Panel C) shows a schematic ochrophyte tree, with six different ancestral nodes within this tree labelled with coloured boxes, and the most probable origin point for each of the 243 haptophyte plastid-targeted proteins of probable ochrophyte origin within this tree, as inferred by inspection of the nearest ochrophyte sister-group in single-gene trees. A detailed heatmap of the ochrophyte sub-categories contained in each lineage is shown in **Figure 8—figure supplement 2**, and BLAST top hit analyses corresponding to each plastid-targeted protein are shown in **Figure 8—figure supplement 3**. (Panel D) shows the number of residues that are uniquely shared between haptophytes and each node of the ochrophyte tree for 37 genes in which there has been a clear transfer from ochrophytes to haptophytes, and entirely vertical subsequent inheritance. A similar graph, showing the earliest possible inferred origin of each uniquely shared residue, is shown in **Figure 8—figure supplement 4**. (Panel E) shows the number of the 12728 conserved gene families inferred to have been present in the last common haptophyte ancestor that are predicted by ASAFind to encode proteins targeted to the plastid, subdivided by probable evolutionary origin, and the number expected to be present in each category assuming a random distribution of plastid-targeted proteins across the entire dataset, independent of evolutionary origin. Evolutionary categories of proteins found to be significantly more likely (chi-squared test,  $p=0.05$ ) to encode plastid-targeted proteins than would be expected by random distribution are labelled with black arrows. The evolutionary origins of the ancestral gene families are shown in **Figure 8—figure supplement 5**.

DOI: [10.7554/eLife.23717.038](https://doi.org/10.7554/eLife.23717.038)

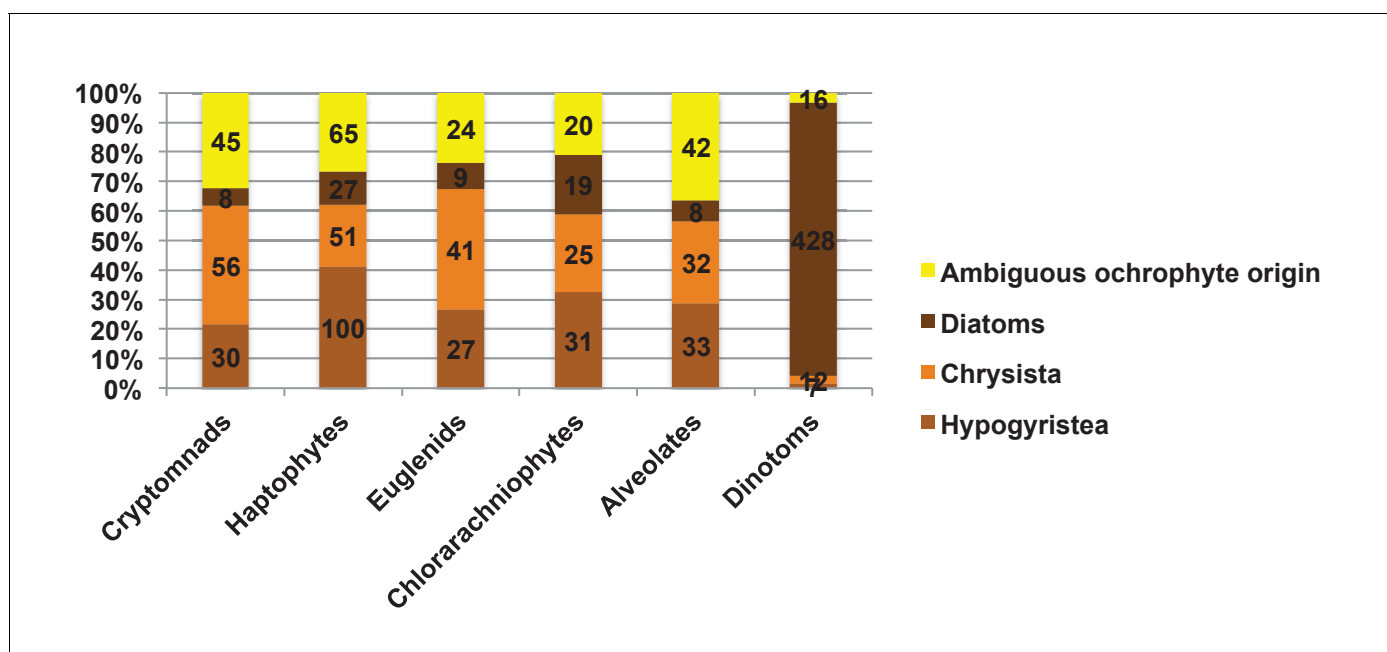

**Figure 8—figure supplement 1.** Origin of proteins of ochrophyte origin in different CASH lineages. This figure profiles the evolutionary origins of proteins inferred by single-gene phylogenetic analysis to have been transferred from the ochrophytes into other lineages that have acquired plastids through secondary or more complex endosymbioses. Proteins are divided into the three major ochrophyte lineages (i.e. diatoms, chrysista, and hypogyristera); all remaining proteins (inferred to have been acquired from an ancestor of multiple ochrophyte lineages, or of ambiguous but clearly ochrophyte origin) are grouped as a final category. The haptophyte proteins that could be attributed to a specific ochrophyte lineage are particularly skewed (100/178 proteins) to origins within the hypogyristera.

DOI: [10.7554/eLife.23717.039](https://doi.org/10.7554/eLife.23717.039)

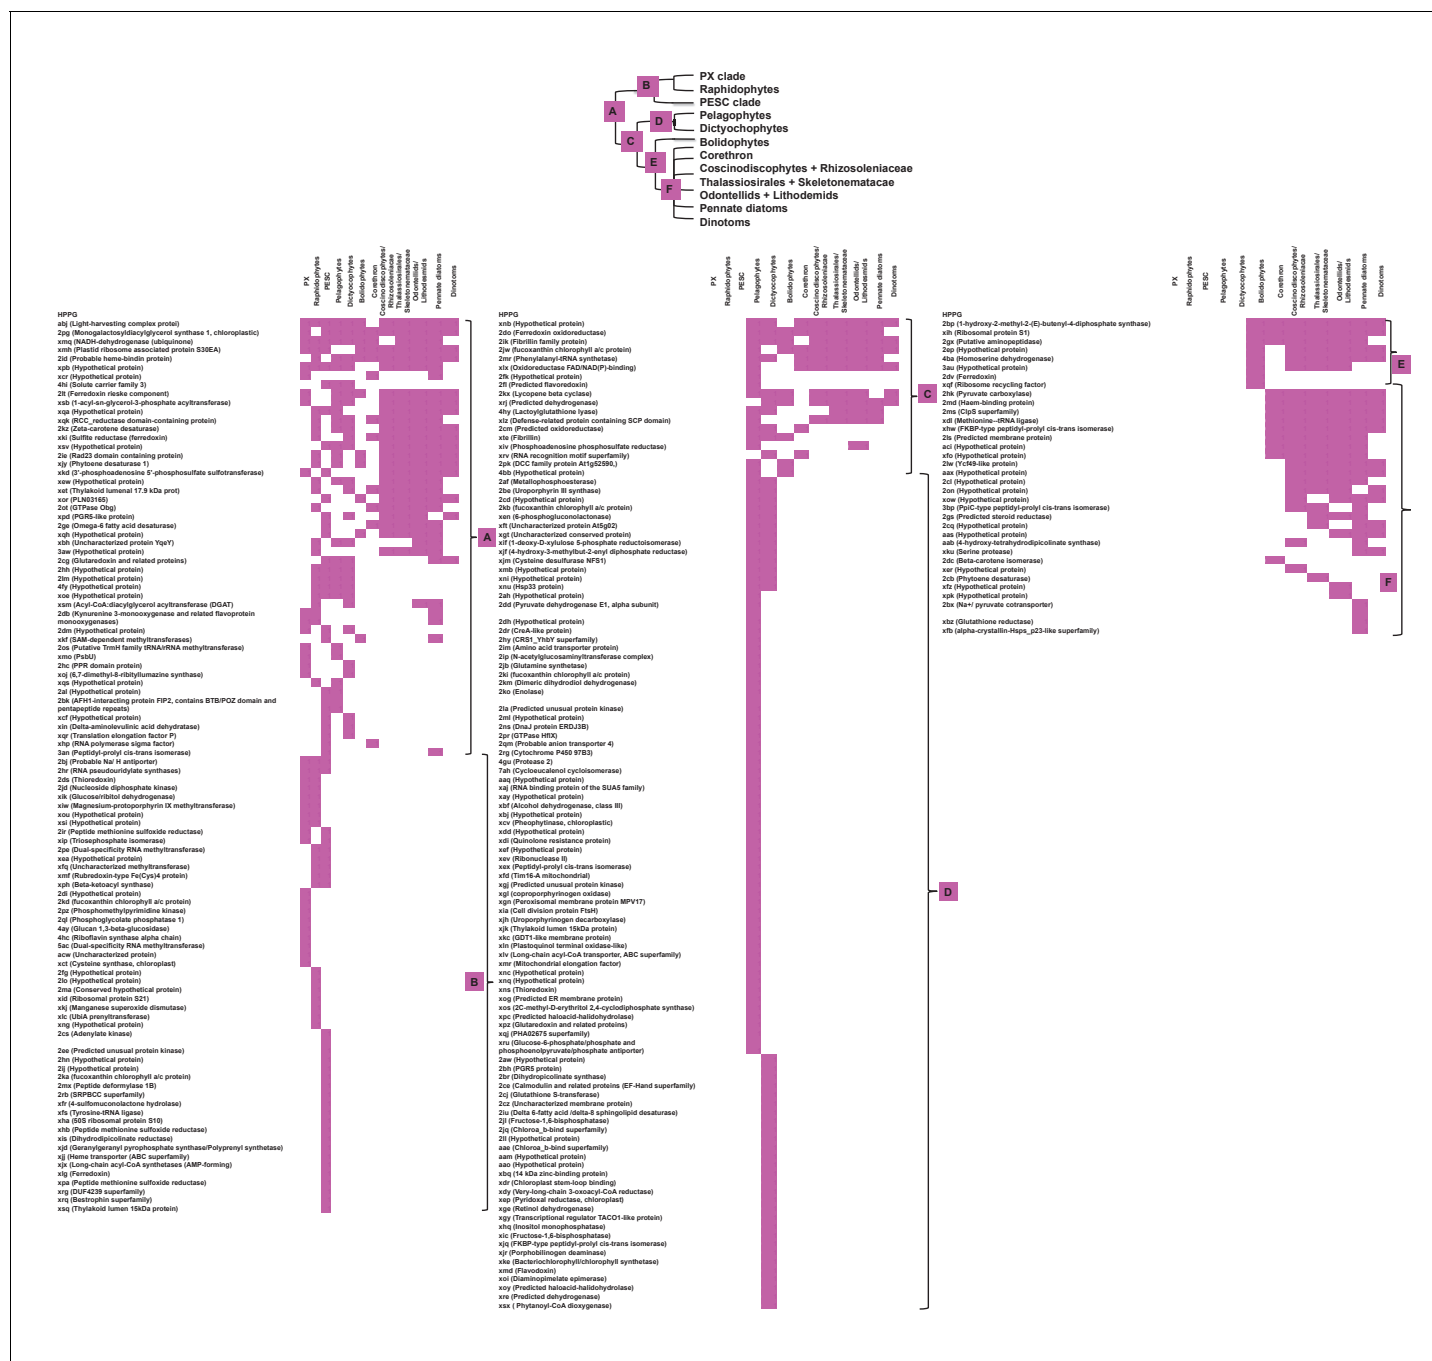

**Figure 8—figure supplement 2.** Heatmaps of nearest sister-groups to haptophytes in ancestral ochrophyte HPPG trees. This figure shows the specific ochrophyte lineages implicated in the origin of haptophyte plastid-targeted proteins, as inferred from the nearest ochrophyte sister-groups to haptophytes in trees of 242 haptophyte proteins of probable ochrophyte origin from combined BLAST top hit and single-gene tree analysis. At the top a schematic tree diagram of the ochrophytes is shown as per **Figure 1**, with six major nodes in ochrophyte evolution labelled with coloured boxes. The heatmap below shows the specific distribution of sister-groups in each tree, shown as per **Figure 4—figure supplement 2**.

DOI: 10.7554/eLife.23717.040

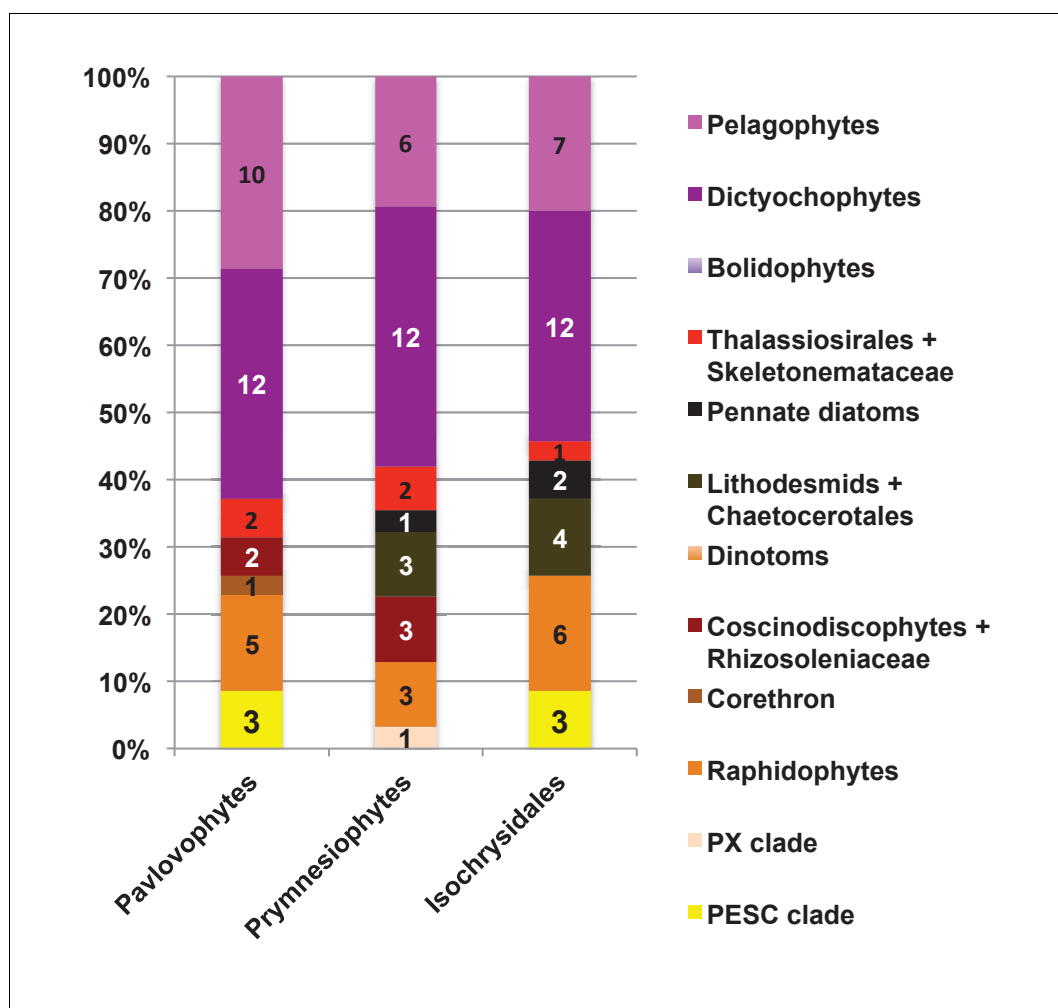

**Figure 8—figure supplement 3.** Internal evolutionary affinities of haptophyte plastid-targeted proteins incorporated into ancestral ochrophyte HPPGs. This figure profiles the evolutionary origins of haptophyte plastid-targeted proteins incorporated into ancestral ochrophyte HPPGs by BLAST top hit analysis. Separate values are provided for query sequences from each of the three haptophyte sub-categories (pavlovophytes, prymnesiophytes, and isochrysidales) considered within the analysis. Only sequences for which a consistent origin could be identified by both BLAST top hit and single-gene tree analysis are included. For each haptophyte lineage >50% of the sequences verified by combined analysis to be of a specific ochrophyte origin have either pelagophyte or dictyochophyte top hits.

DOI: [10.7554/eLife.23717.041](https://doi.org/10.7554/eLife.23717.041)

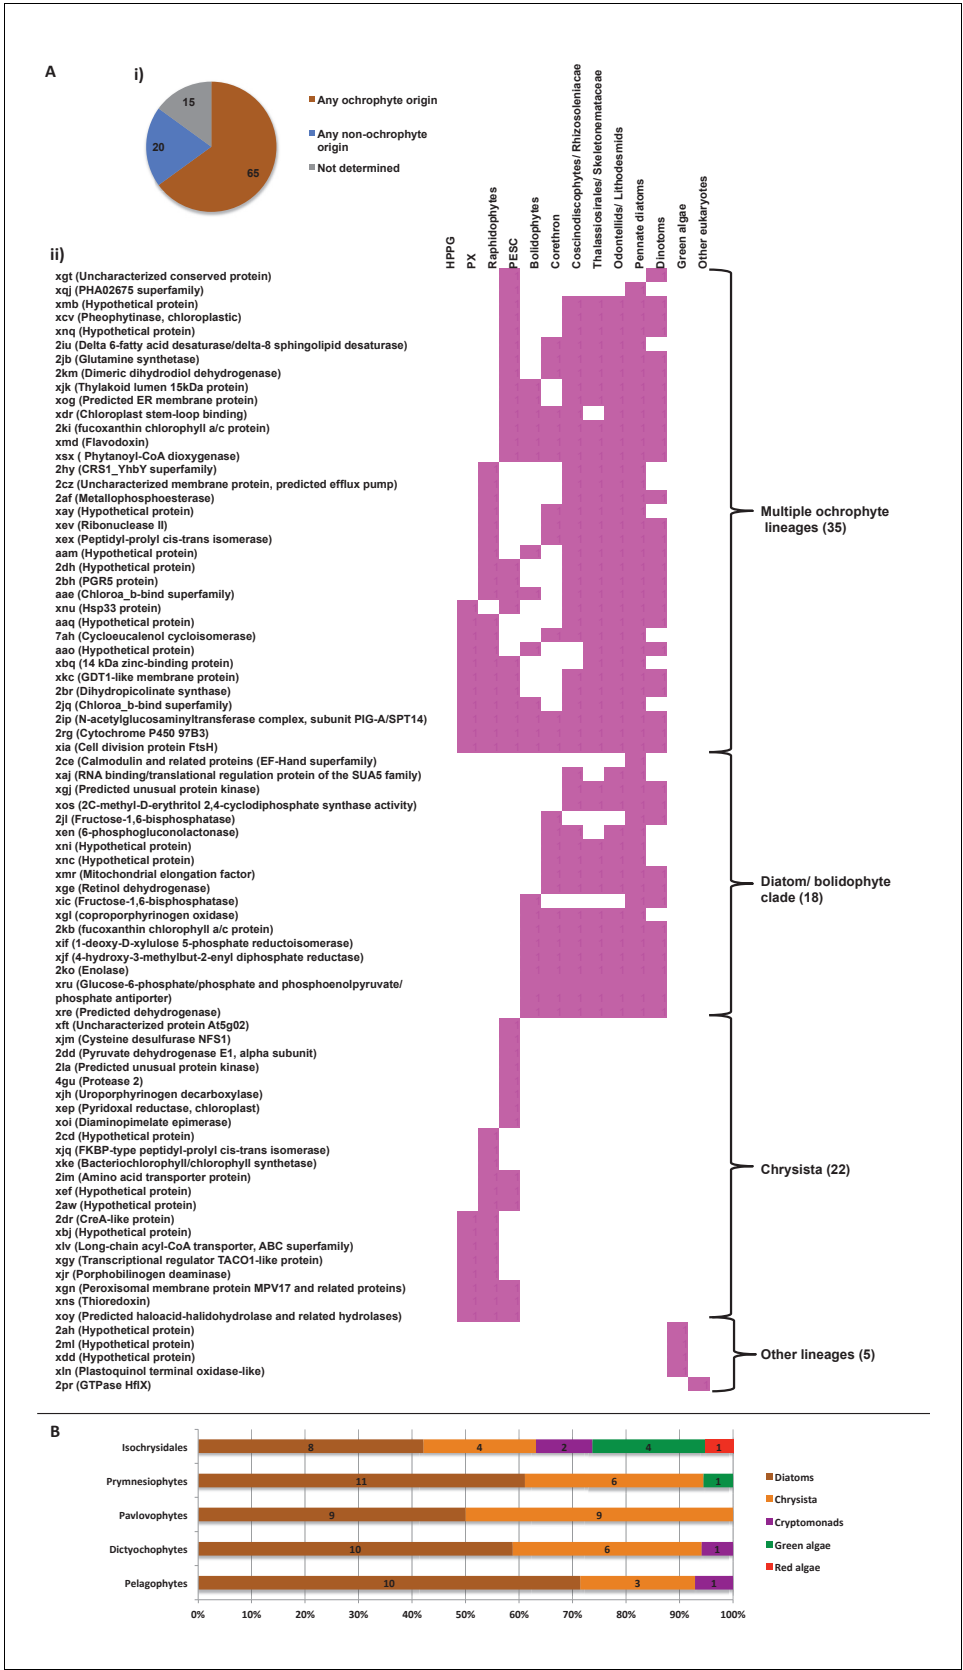

**Figure 8—figure supplement 4.** Evidence for gene transfer from pelagophytes and dictyochoophytes into haptophytes. (Panel A) shows the next deepest sister groups identified for haptophyte proteins of hypogyrustean origin in single-gene trees. The pie chart (i) compares the number of single-  
*Figure 8—figure supplement 4 continued on next page*

*Figure 8—figure supplement 4 continued*

gene trees in which the combined clade of haptophyte and hypogyrystean proteins resolves within a larger clade comprising the ochrophyte HPPG, compared to the number that resolves in external positions, either with other lineages or as a sister-group to all other sequences within the HPPG clade. Sequences for which no clear next deepest sister group affinity could be identified are listed as 'not determined'. The heatmap (ii) shows the specific sister-group sequences associated with 65 HPPGs in which the haptophyte sequences specifically resolve with the pelagophyte/dictyochophyte clade and for which a clear internal or external position for the haptophyte/ hypogyrystean group relative to the remaining ochrophyte HPPG clade could be identified. Both analyses indicate a clear bias for haptophyte sequences branching within a deeper ochrophyte clade, not just restricted to the immediate sister-groups. (Panel B) tabulates the BLAST next best hits for haptophyte sequences for which a phylogenetically consistent (>3 consecutive top hits) top hit to hypogyrystea could be identified, and pelagophyte/dictyochophyte sequences for which a phylogenetically consistent top hit to haptophytes could be identified. In each case either the largest number of sequences, or (in the case of pavlovophytes) the joint largest number of sequences for which a phylogenetically consistent next best hit could be identified resolved with diatoms, indicating that these sequences were probably present in the common ancestor of diatoms and hypogyrystea, and subsequently transferred to the haptophytes.

DOI: [10.7554/eLife.23717.042](https://doi.org/10.7554/eLife.23717.042)

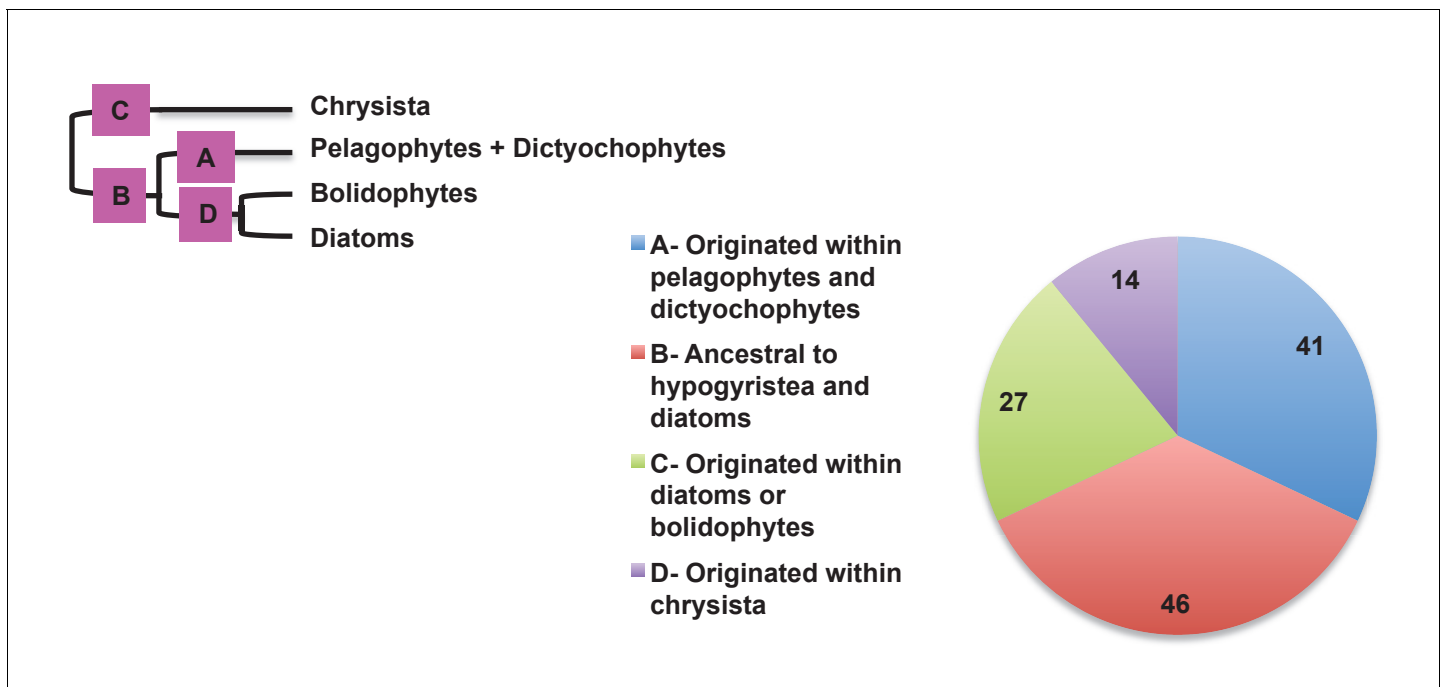

**Figure 8—figure supplement 5.** Earliest possible origin points of uniquely conserved sites in haptophyte plastid-targeted proteins. This figure shows the total number of residues that are uniquely shared between a 37 proteins that have clearly been transferred between the ochrophytes and haptophytes, and are of subsequently entirely vertical origin, assuming the earliest possible origin point for each residue (i.e. in which gapped or missing positions were interpreted as identities). 87/128 of the uniquely shared residues inferred to originate within the ochrophytes were congruent to gene transfers between the haptophytes and pelagophyte and dictyochophyte clade; of these, slightly more than half (46) are inferred to have originated in a common ancestor of all hypogyrystea and diatoms, consistent with the gene transfer having occurred from an ancestor of the pelagophytes and dictyochophytes into the haptophytes, rather than the converse.

DOI: [10.7554/eLife.23717.043](https://doi.org/10.7554/eLife.23717.043)

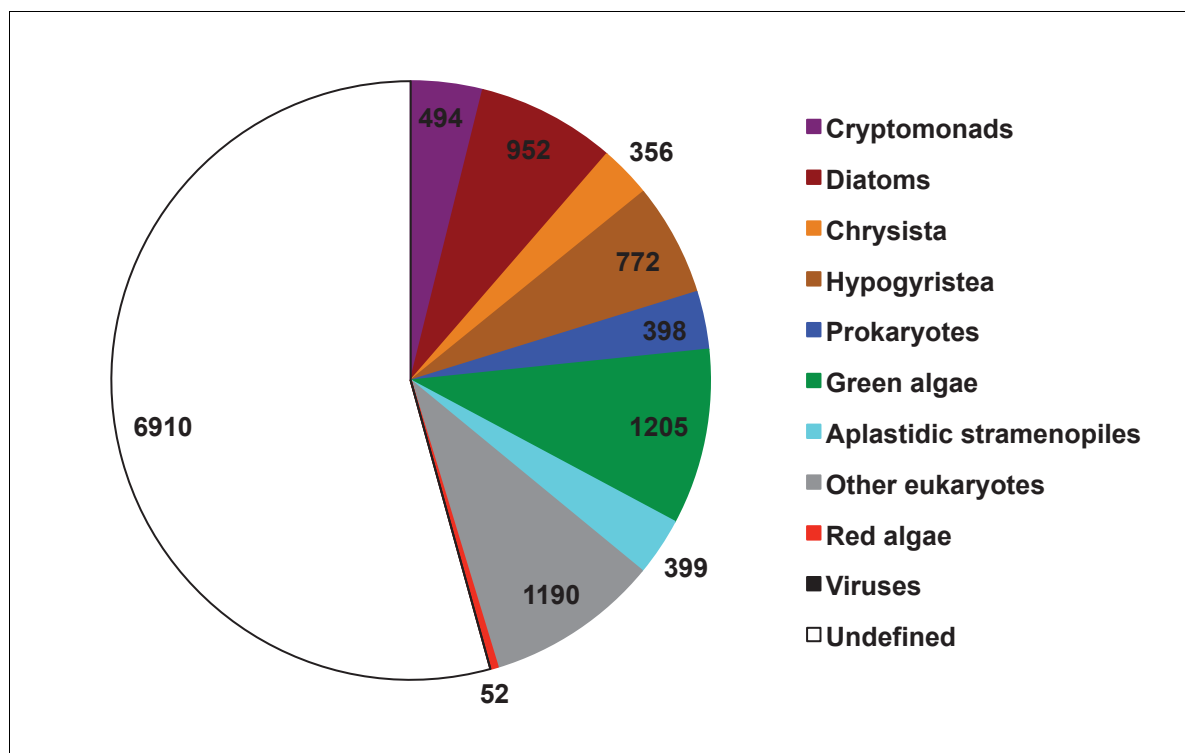

**Figure 8—figure supplement 6.** Evolutionary origin of ancestral haptophyte genes. This figure shows the most likely evolutionary origin assigned by BLAST top hit analysis to the 12728 conserved gene families inferred to have been present in the last common haptophyte ancestor.

DOI: [10.7554/eLife.23717.044](https://doi.org/10.7554/eLife.23717.044)



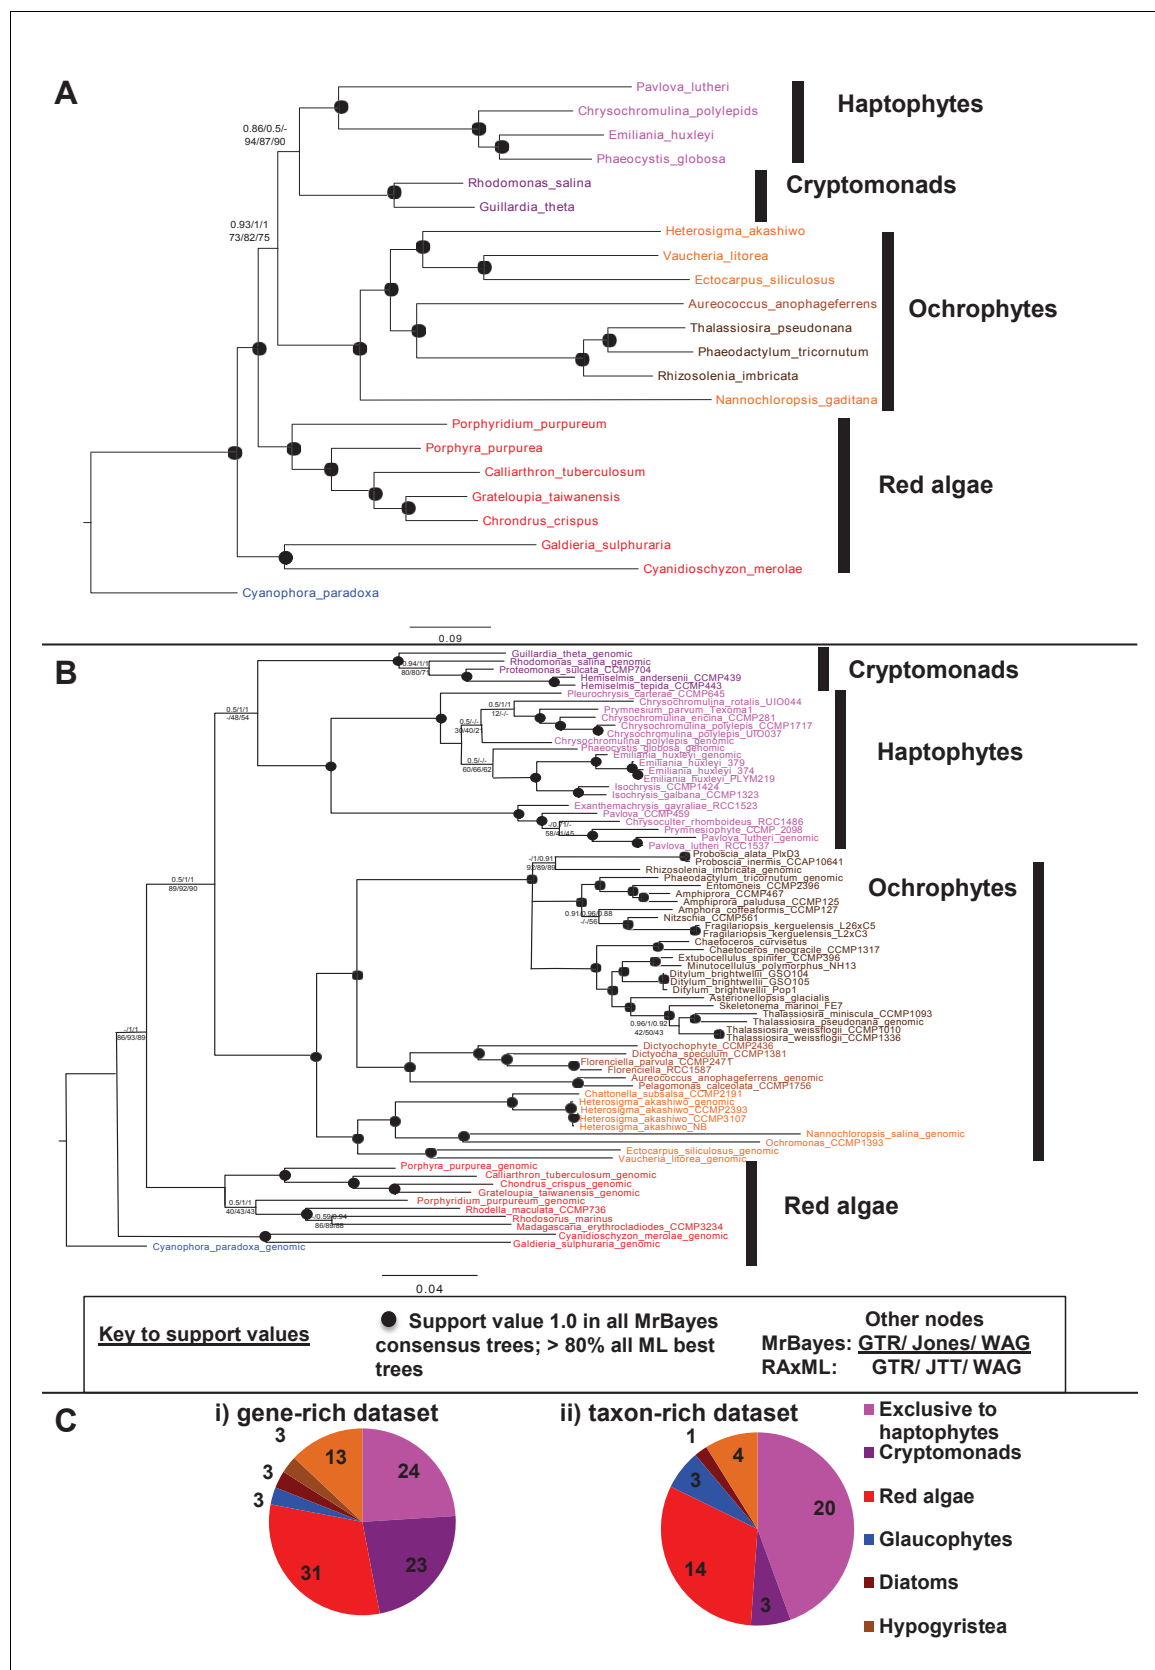

**Figure 9.** Non-ochrophyte origins of the haptophyte plastid genome. (Panels A and B), respectively, show gene-rich and taxon-rich phylogenies of plastid-encoded proteins from red algae and plastids of red algal origin with the glaucophyte *Cyanophora paradoxa* as outgroup. (Panel A) Combined Figure 9 continued on next page

*Figure 9 continued*

Bayesian and Maximum Likelihood analysis (MrBayes + RAxML, GTR, JTT, WAG) of a 22 taxa x 12103 aa alignment of 54 proteins encoded by all published red and red-derived plastid genomes. (Panel B) analysis of a 75 taxa x 3737 aa alignment of 10 conserved plastid-encoded proteins detectable in a broad range of red lineage MMETSP libraries. Nodes resolve with robust support (posterior probabilities of 1 for all Bayesian trees and >80% bootstrap support for all ML trees) are shown with filled circles; individual support values for each analysis are shown for the remaining nodes as detailed in the box below panel B. Alternative topology tests, the results of fast-site and clade deduction analysis for each tree, and heatmap comparisons of sister-group relationships identified for single-gene trees of each constituent gene within each concatenated alignment are shown in **Figure 9—figure supplements 1–3**. (Panel C) shows the number of residues in each alignment that are uniquely shared between haptophytes and only one other lineage. For the gene-rich alignment (i), which is gap-free, residues are included that are found in all four haptophyte sequences and at least one sequence from the lineage under consideration. For the taxon-rich alignment (ii), to account for the presence of gapped positions, residues are included that are found in at least 11 of the 22 haptophyte sequences and at least one sequence from the lineage under consideration.

DOI: [10.7554/eLife.23717.045](https://doi.org/10.7554/eLife.23717.045)

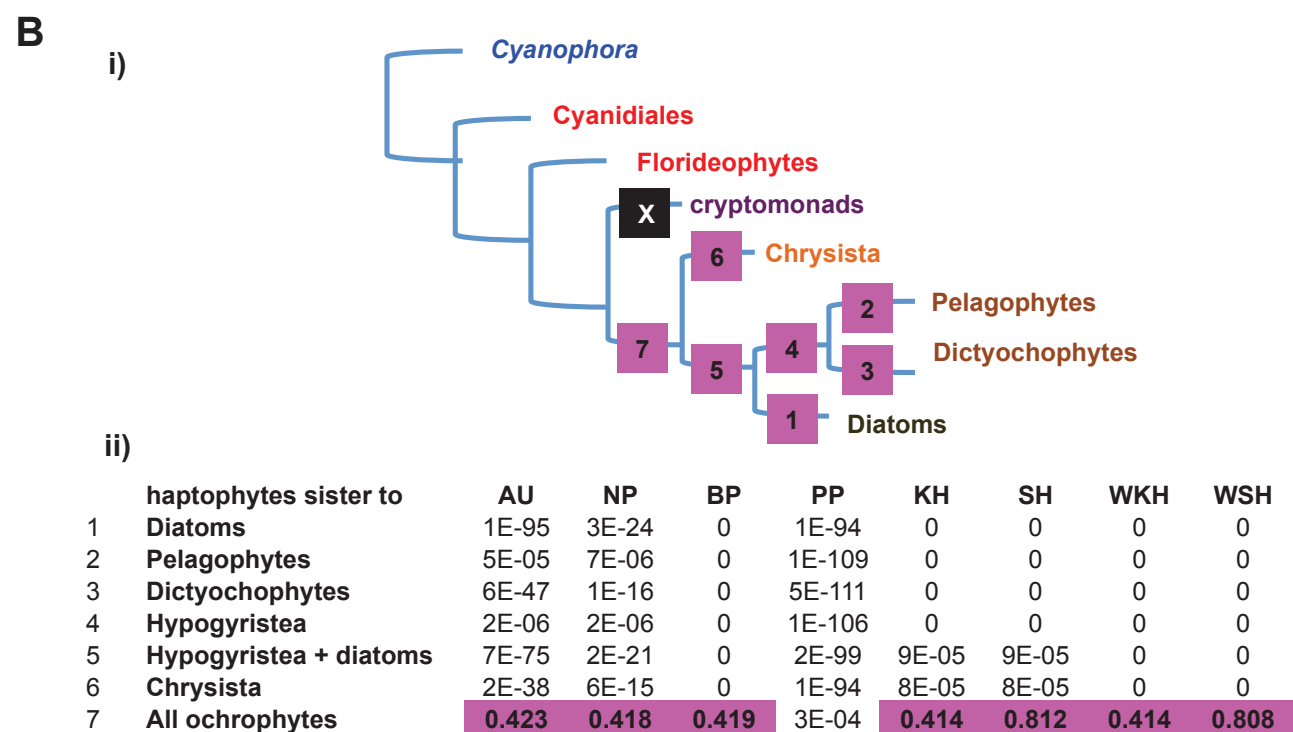

- AU - approximately unbiased test
- NP & BP - bootstrap probabilities for the selection
- PP - bayesian posterior probability (using BIC)
- KH - Kishino-Hasegawa test
- SH - Shimodaira-Hasegawa test
- WKH & WSH - weighted versions of the above two tests

*Figure 9—figure supplement 1 continued*

given (i). The black box corresponds to the branch position of haptophytes in the consensus tree; alternative branching positions for the haptophyte sequences are labelled with numbered boxes. The table below (ii) lists the probabilities for each alternative position under eight different tests performed with CONSEL. Alternative positions that are not rejected by a topology test are shaded. All possible trees in which the haptophyte sequences branch within the ochrophytes are clearly rejected under all conditions, confirming that its plastid genome is of non-ochrophyte origin. The legend at the bottom of panel B gives full names for each test performed.

DOI: [10.7554/eLife.23717.046](https://doi.org/10.7554/eLife.23717.046)

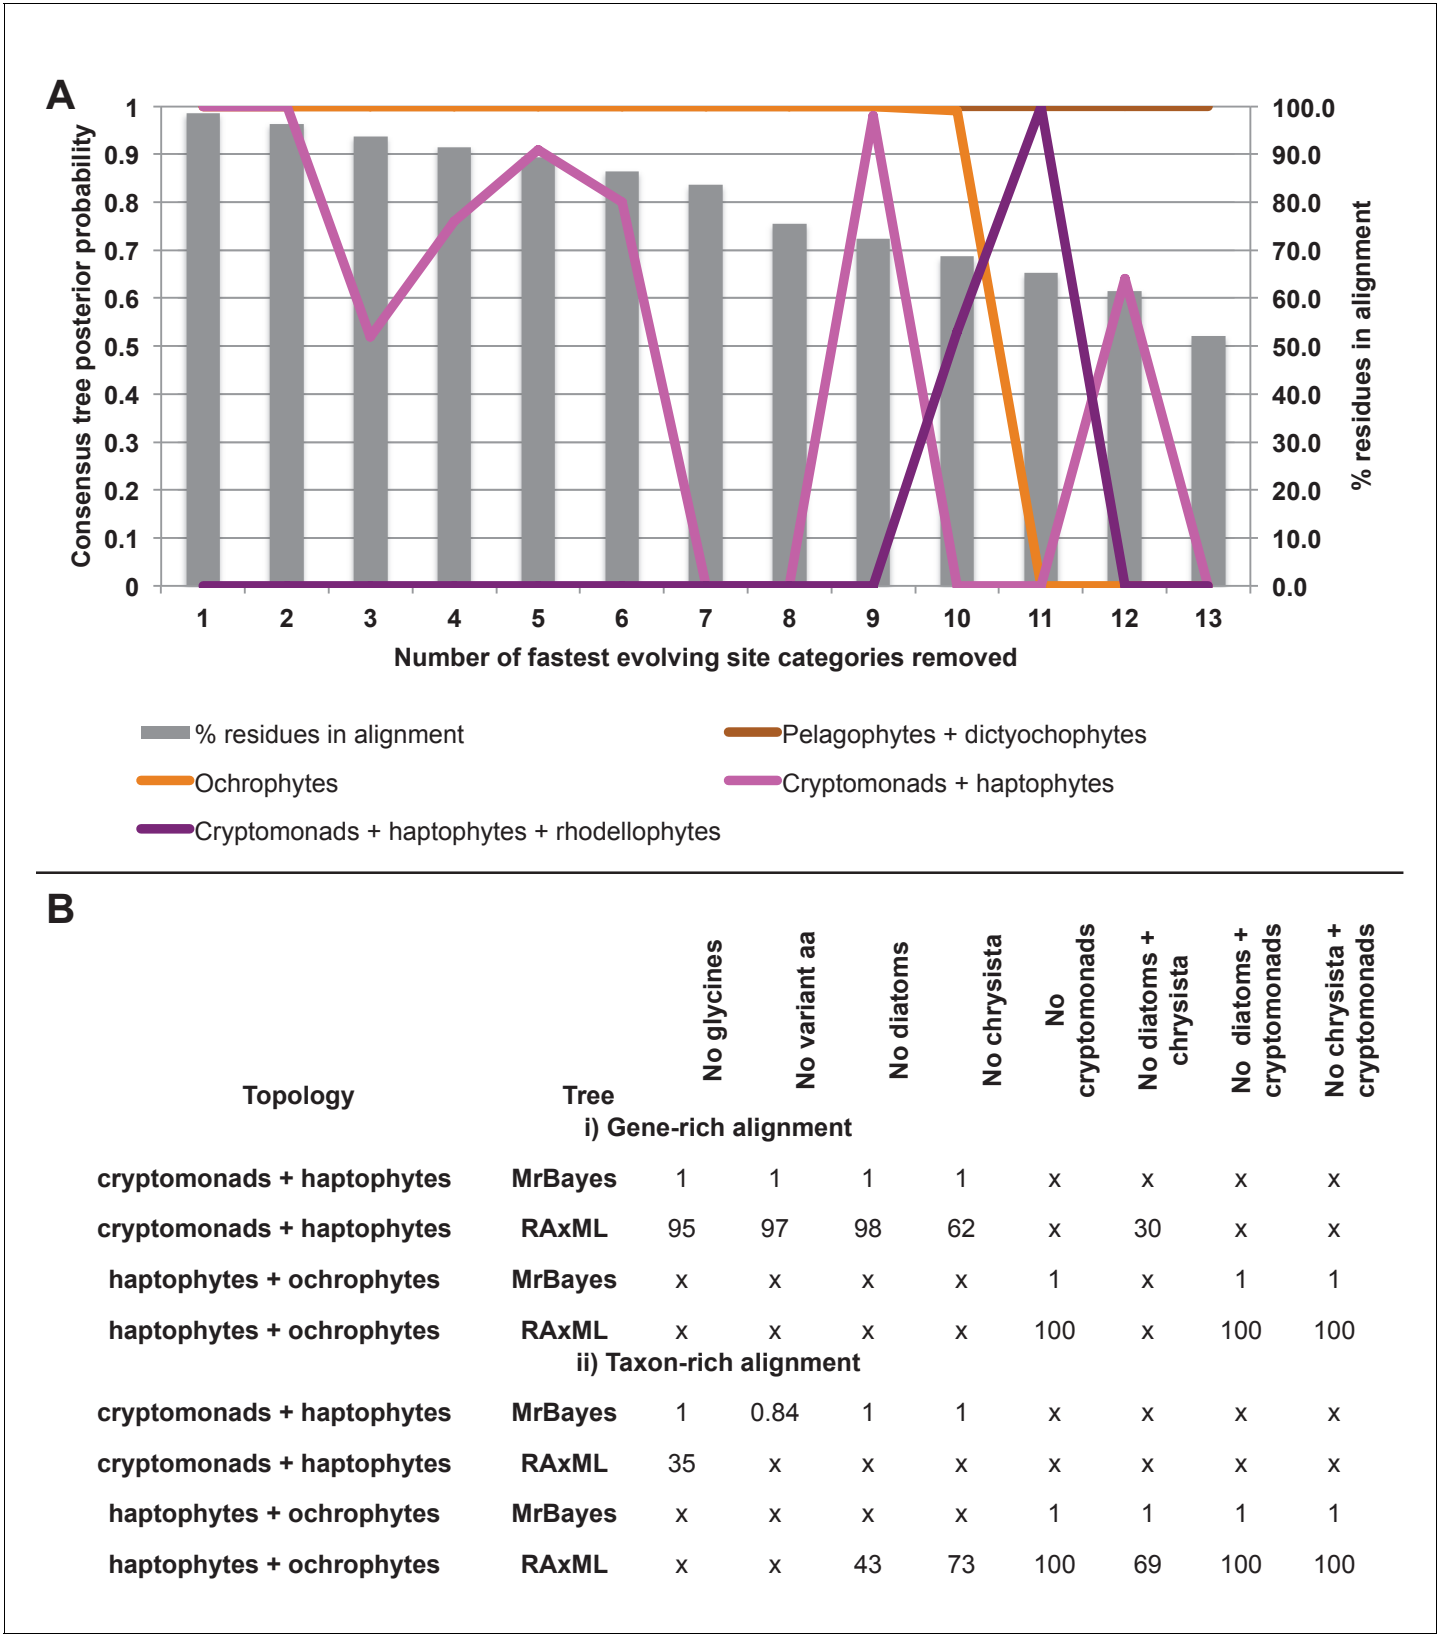

**Figure 9—figure supplement 2.** Fast site removal and clade deduction analysis of plastid genome trees. (Panel A) shows the support values obtained for Bayesian + Jones trees inferred from modified versions of the taxon-rich plastid multigene alignment from which the 13 fastest evolving site categories had been removed for four different branching relationships pertaining to the placements of haptophyte and hypogyristean sequences. The Figure 9—figure supplement 2 continued on next page

*Figure 9—figure supplement 2 continued*

% of residues from the original alignment retained in each modified alignment are shown with grey bars. (Panel **B**) tabulates the support obtained for two different evolutionary relationships (haptophytes as a sister group to all cryptomonads, and as a sister group to all ochrophytes) in gene-rich (i) and taxon-rich (ii) alignments modified to remove all amino acids that occur at different frequencies in haptophytes to ochrophyte lineages, and modified to remove individual or pairs of CASH lineages. 'x' indicates that the topology in question was not obtained.

DOI: [10.7554/eLife.23717.047](https://doi.org/10.7554/eLife.23717.047)

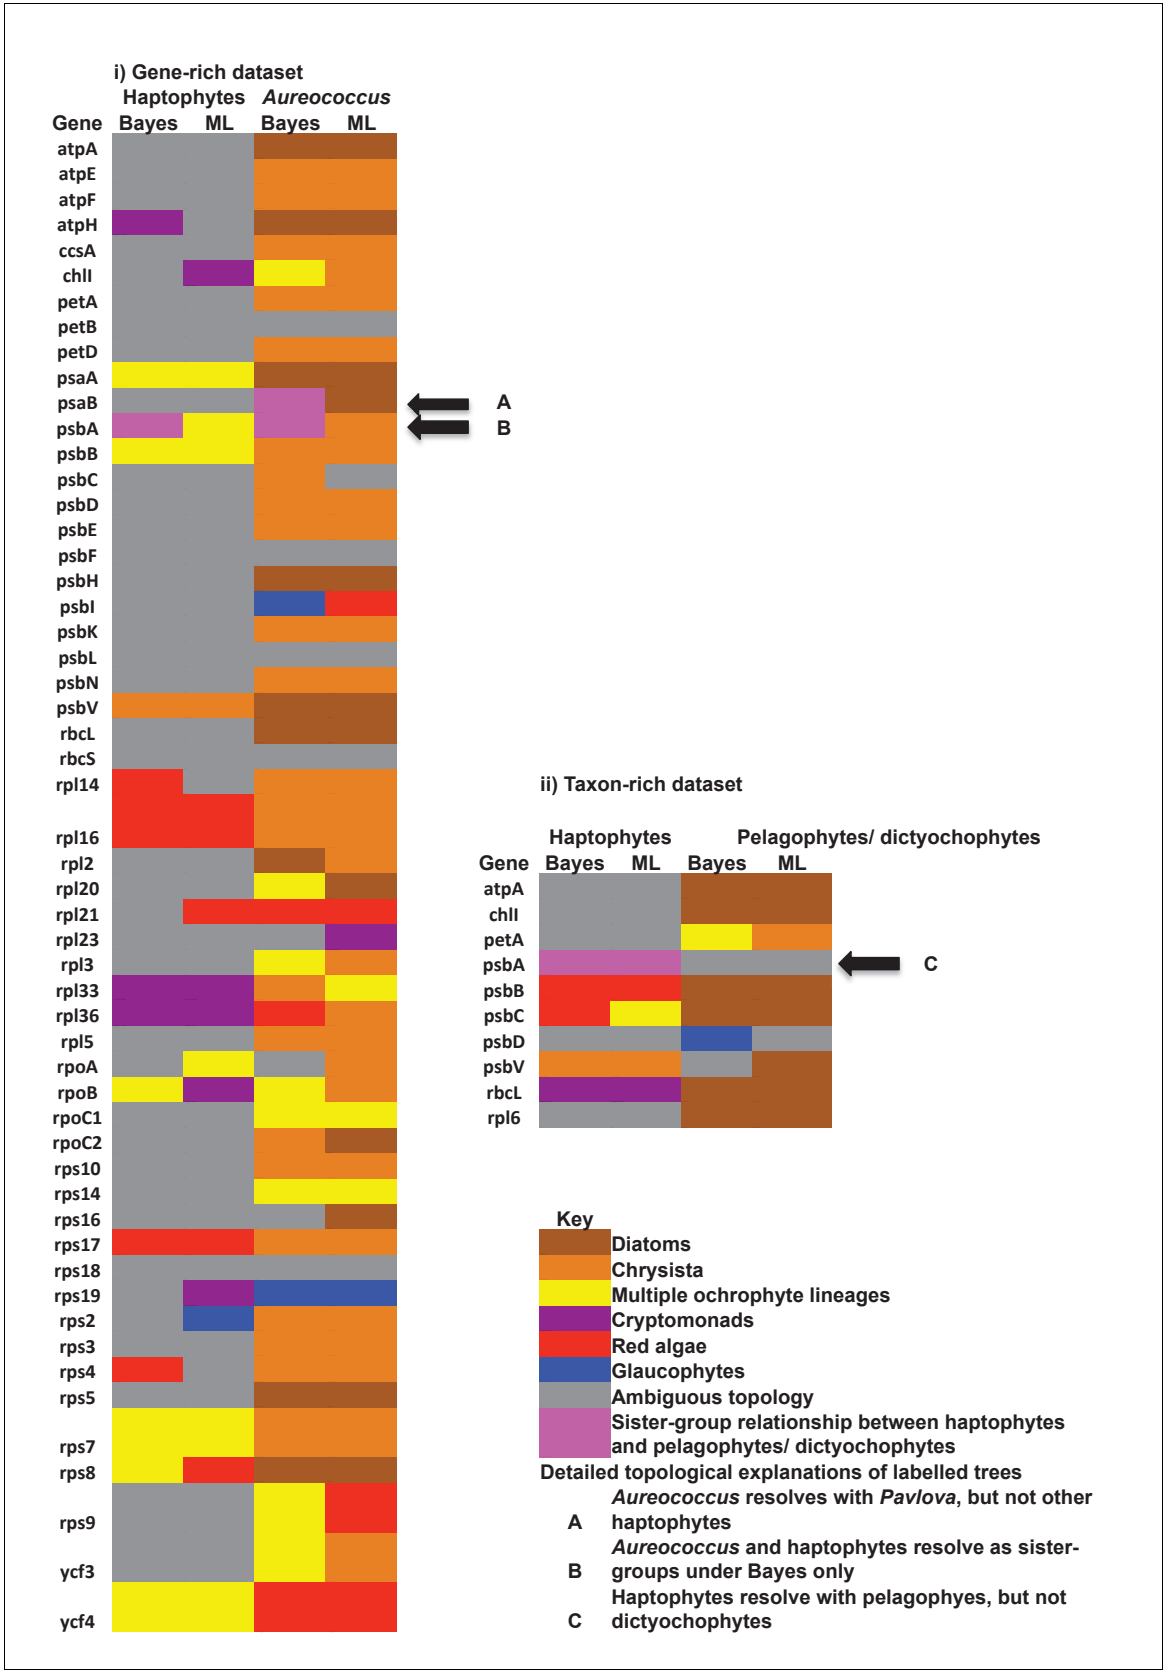

**Figure 9—figure supplement 3.** Single-gene tree topologies associated with individual plastid-encoded genes. These heatmaps show the first sister-groups identified to haptophytes, and members of the pelagophyte/dictyochophyte clade, in single-gene trees of component genes included in Figure 9—figure supplement 3 continued on next page

*Figure 9—figure supplement 3 continued*

concatenated trees of plastid-encoded proteins using both the gene-rich (i) and taxon-rich (ii) alignments. Topologies are given for trees inferred with MrBayes using the Jones substitution matrix, and RAxML trees inferred using JTT, under the same conditions as the multigene trees. The identity of the first sister-group is shaded according to the legend given below. Only three single-gene trees (labelled with black arrows) support any sister-group relationship between haptophytes and the pelagophyte/dictyochophyte clade; however, in each case (explained beneath the legend) this topology is not robustly supported, either due to polyphyly of one of the constituent lineages, or conflicting topologies identified via alternative methods.

DOI: [10.7554/eLife.23717.048](https://doi.org/10.7554/eLife.23717.048)



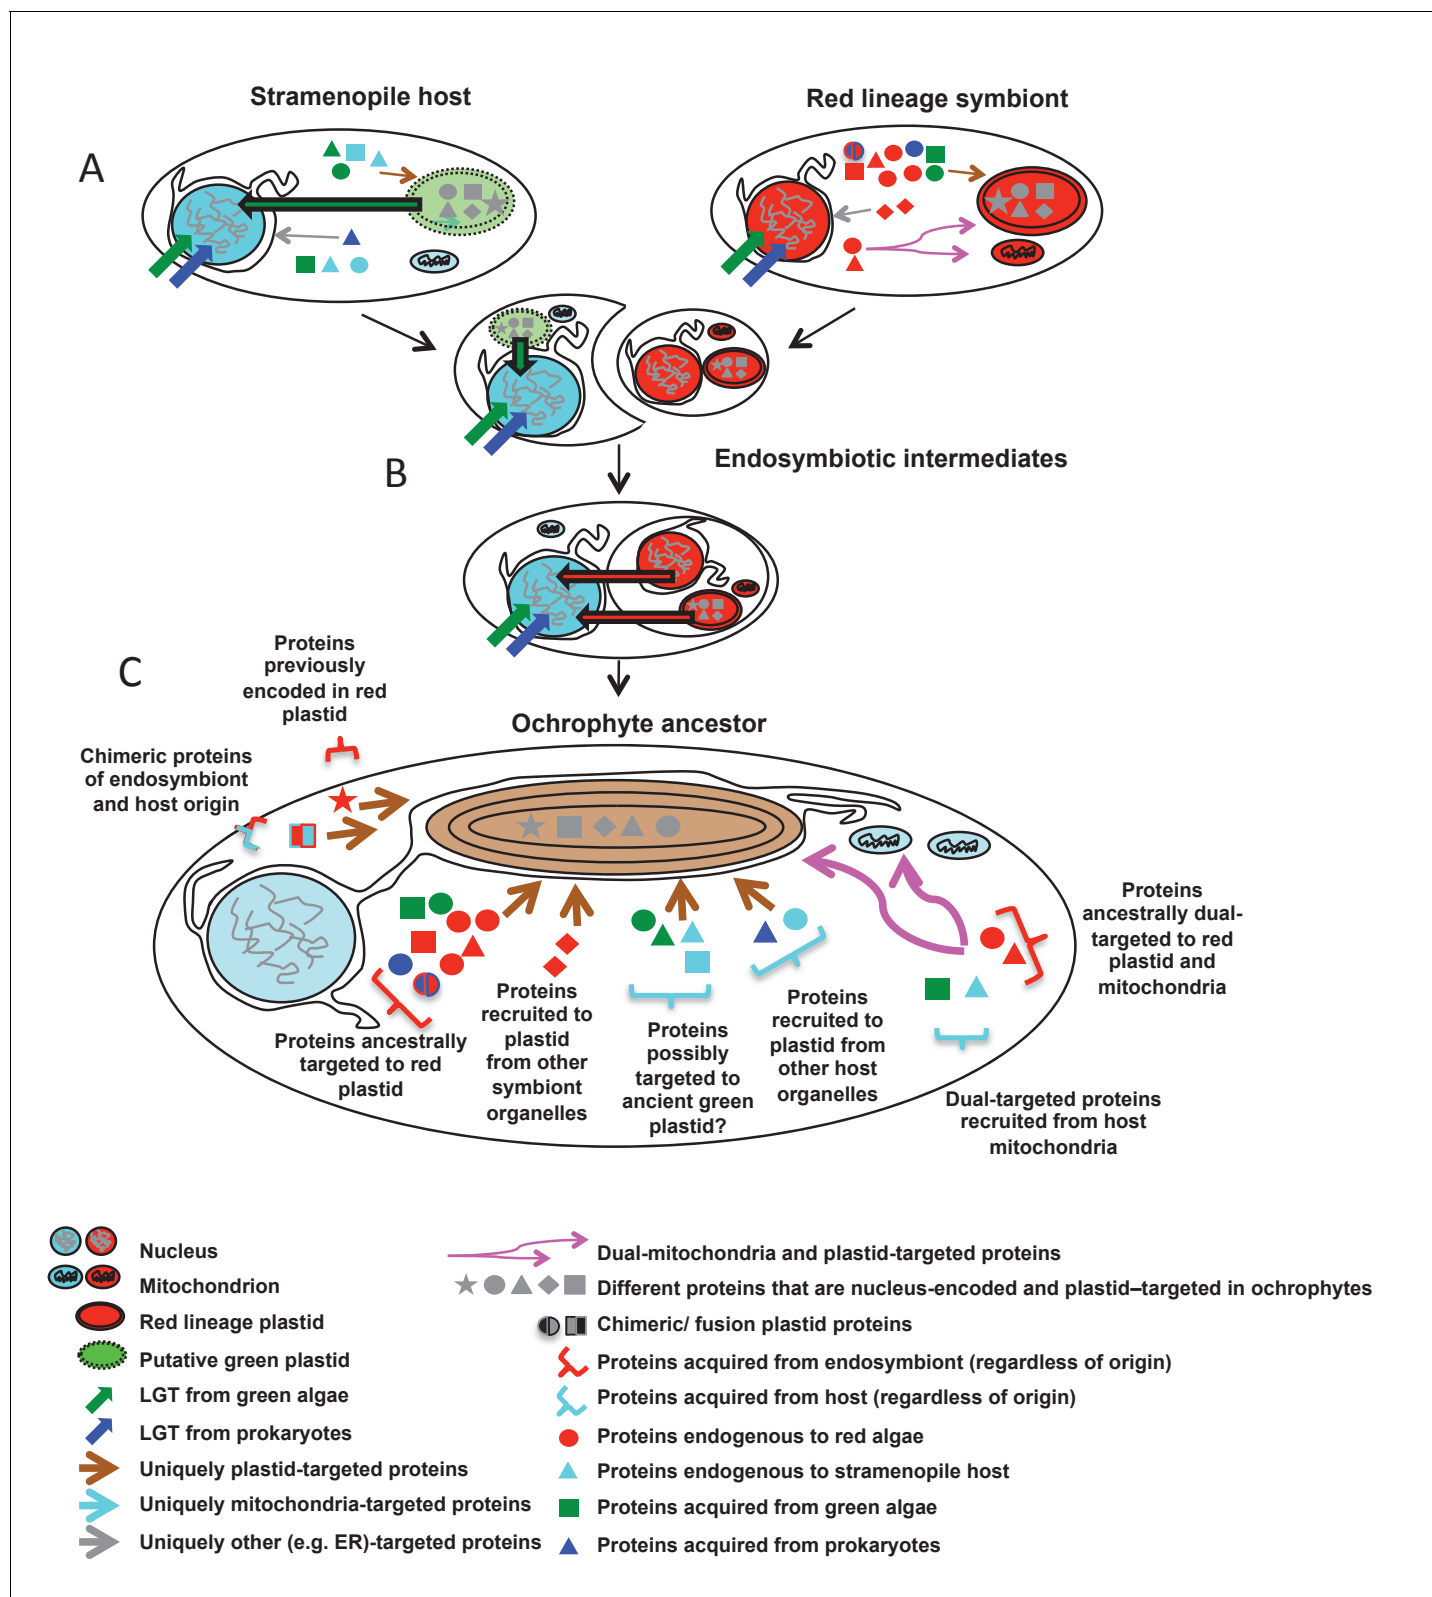

**Figure 10.** Schematic diagram of events giving rise to the ancestral ochrophyte plastid proteome. Each cell diagram depicts a different stage in the ochrophyte plastid endosymbiosis; each protein depicted represents one or more proteins inferred in this study to have been nucleus-encoded and plastid-targeted in the last common ancestor of all ochrophytes. An ancient ochrophyte ancestor, which had already diverged from oomycetes and other aplastidic stramenopile relatives, and which may have possessed a green algal plastid (A), acquired a red lineage plastid via secondary or higher

Figure 10 continued on next page

*Figure 10 continued*

endosymbiosis (**B**). Both the host and the endosymbiont are likely to have been evolutionary chimeras, possessing proteins encoded by genes acquired from endosymbiotic and/or lateral gene transfer events. Both host and symbiont are additionally likely to have possessed chimeric proteins, generated through the fusion of genes of different evolutionary origins, and a large number of mitochondrial-, ER- and (in the case of the red endosymbiont) potentially dual-targeted proteins. Following genetic integration of the red endosymbiont with its stramenopile host, the first ochrophytes (**C**) thus possessed a wide range of proteins of plastid function acquired from different sources, with no apparent functional bias in the types of proteins that were retained from different sources. Chimeric proteins and dual-targeted proteins, either acquired directly from the endosymbiont, or generated *de novo*, were also widespread features of this ancestral plastid proteome. Detailed information regarding the relationship between ultimate the evolutionary origins of each HPPG, and its presence or absence in other CASH lineages, is provided in **Figure 10—figure supplement 1**. A schematic diagram of possible models through which the haptophyte plastid may have originated is shown in **Figure 10—figure supplement 2**.

DOI: [10.7554/eLife.23717.049](https://doi.org/10.7554/eLife.23717.049)

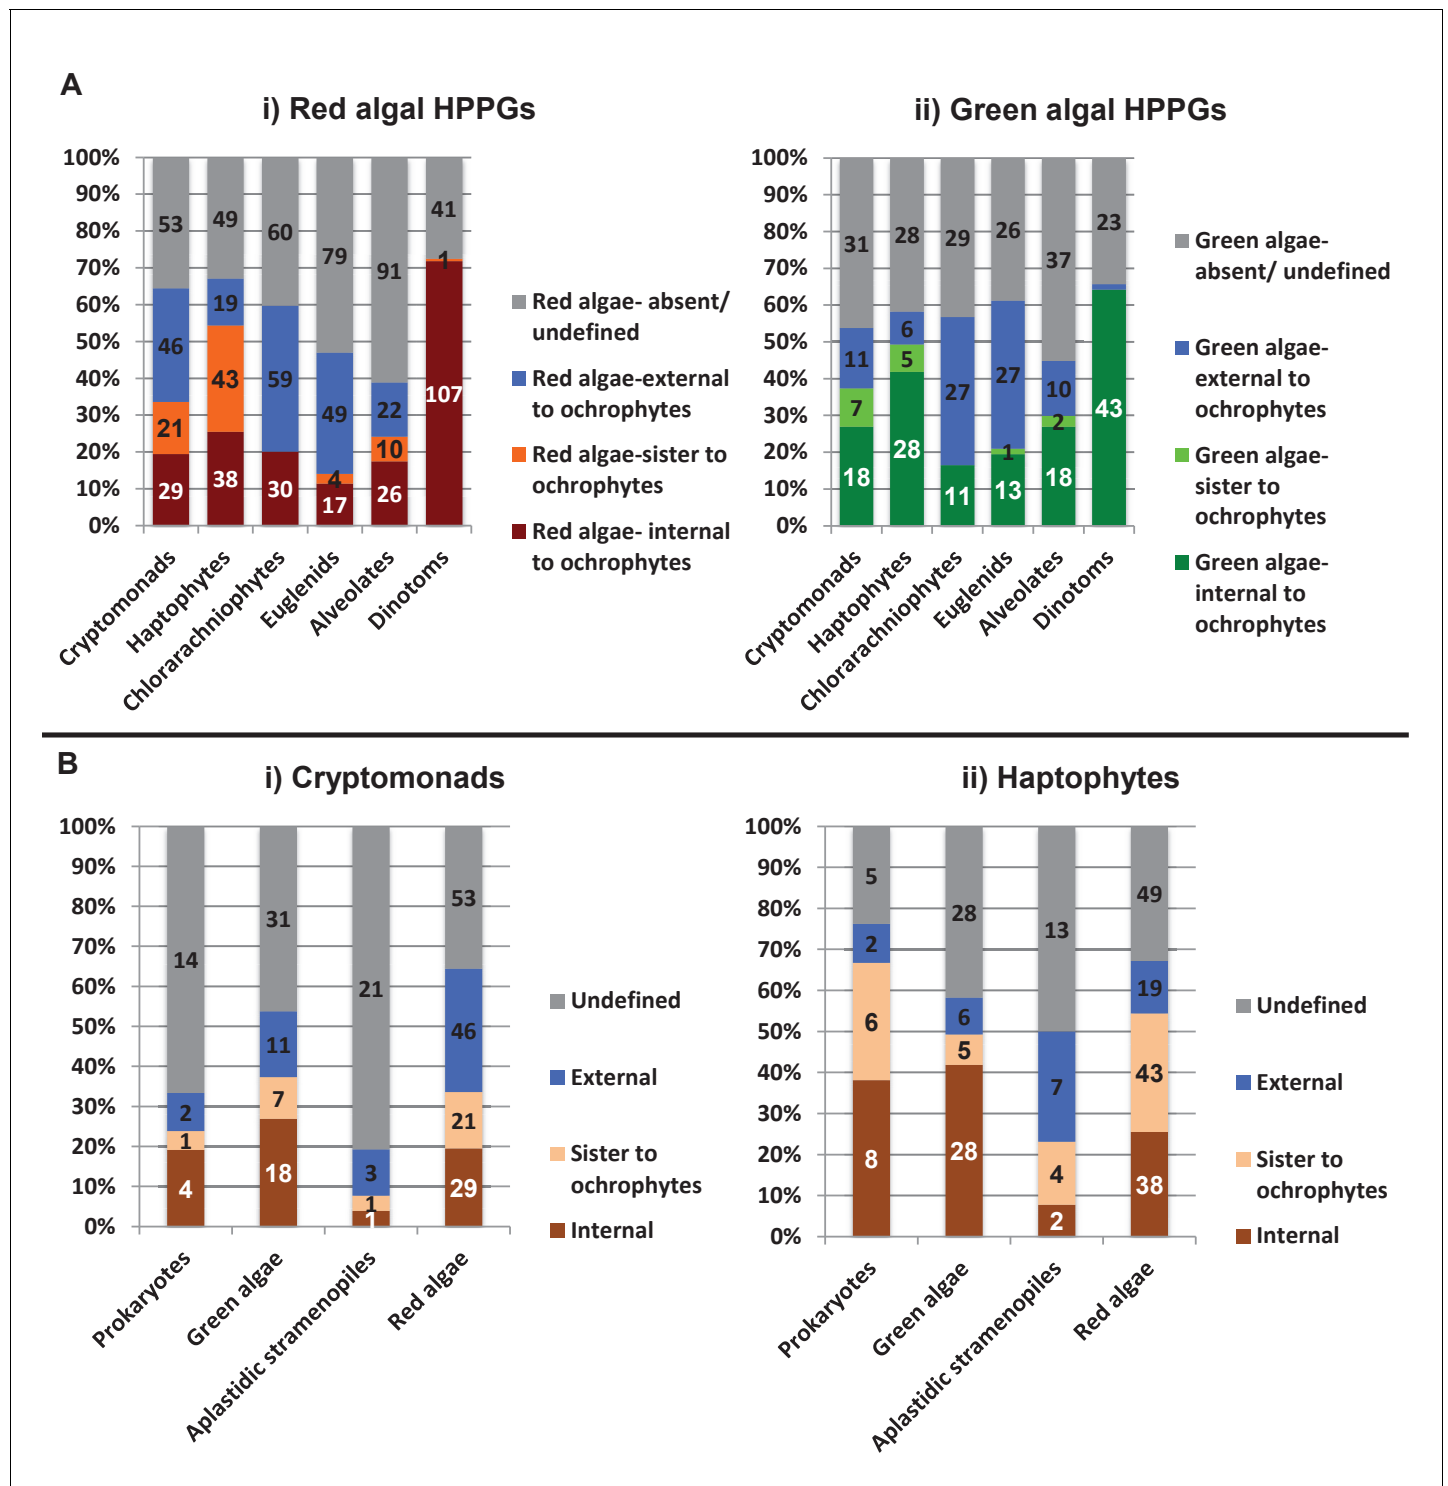

**Figure 10—figure supplement 1.** Complex origins of different ancestral ochrophyte HPPGs. (Panel A) shows the evolutionary positions of lineages with histories of secondary endosymbiosis in trees of ancestral ochrophyte HPPGs verified by combined BLAST top hit and single-gene tree analysis to be either of red algal (i) or green algal origin (ii). In both cases, in more than half of the constituent trees, haptophyte and cryptomonad sequences resolve as closer relatives to the ochrophytes than the red or green algal evolutionary outgroup, either due to resolving in the ochrophyte HPPG or forming a specific sister-group to the ochrophyte lineages. (Panel B) plots the distribution of cryptomonads (i) and haptophytes (ii) in trees for different categories of ancestral ochrophyte HPPG of verified evolutionary origin. HPPGs of green algal origin more frequently show internal or sister positions for the cryptomonad sequences than all other categories of HPPG, and in more than 50% of cases resolve internal or sister positions for the haptophyte

Figure 10—figure supplement 1 continued on next page

Figure 10—figure supplement 1 continued

sequences. This might be consistent with a green algal contribution to the endosymbiotic ancestor of cryptomonad, haptophyte and ochrophyte plastids.

DOI: [10.7554/eLife.23717.050](https://doi.org/10.7554/eLife.23717.050)

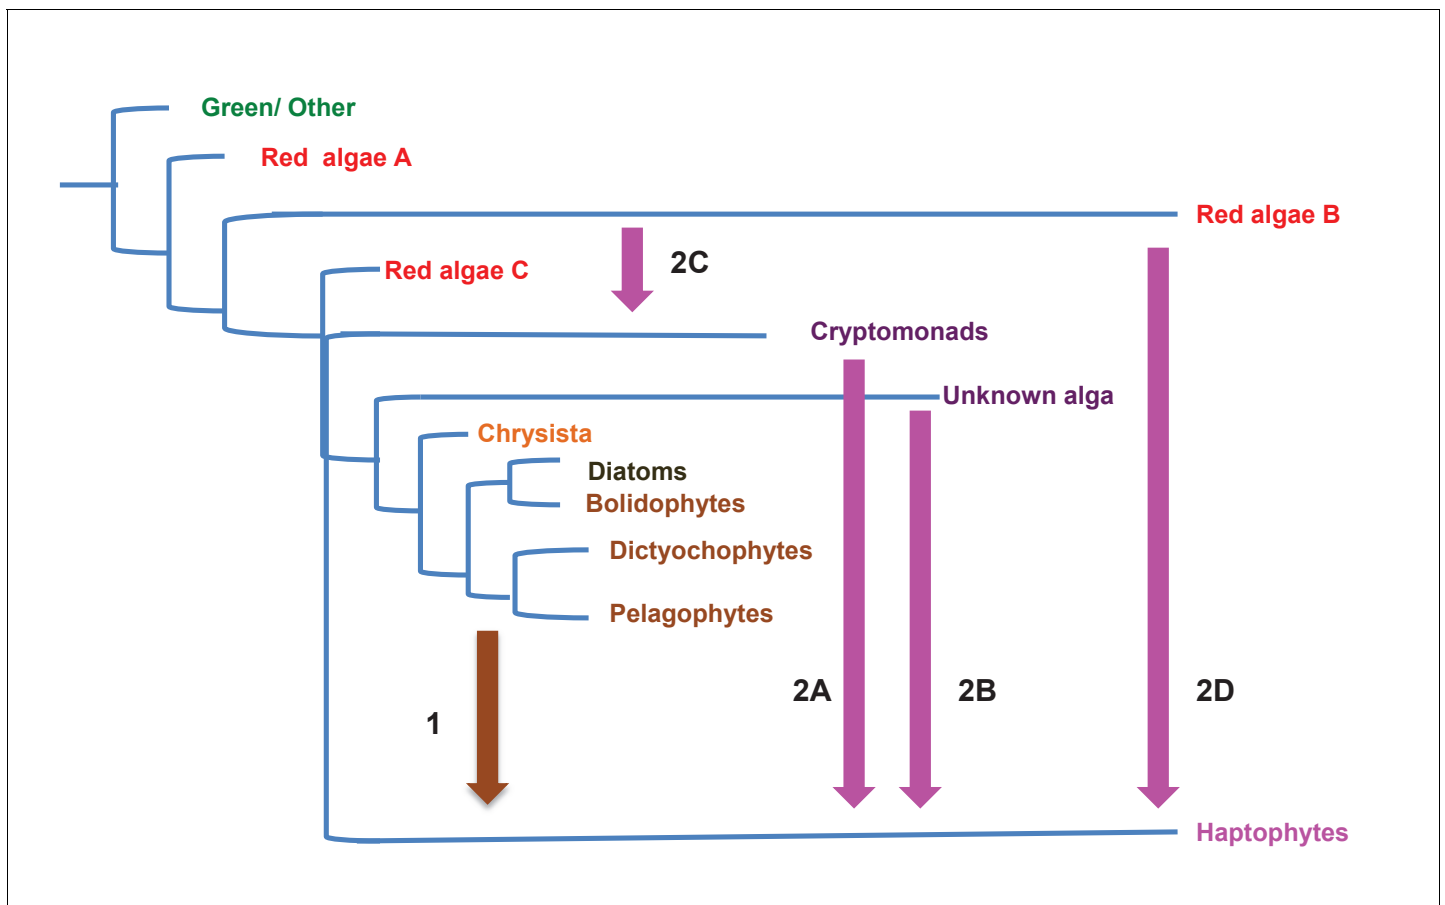

**Figure 10—figure supplement 2.** Different scenarios for the origins of haptophyte plastids. This schematic tree diagram shows different possibilities for the origins of the haptophyte plastid as predicted from the data within this study. No inference is made here regarding the ultimate origin of the ochrophyte plastid, although the ochrophyte, cryptomonad and haptophyte plastids are likely to be closely related to one another within the red plastid lineages. First, a common ancestor of the pelagophytes and dictyochophytes was taken up by a common ancestor of the haptophytes (point 1), yielding a permanent plastid that contributed genes for a large number of plastid-targeted proteins in extant haptophytes. This plastid was subsequently replaced via serial endosymbiosis (point 2) yielding the current haptophyte plastid and plastid genome. This serial endosymbiosis event either involved a close relative of extant cryptomonads (2A) or a currently unidentified species that forms a sister-group in plastid gene trees to all extant ochrophytes, but is evolutionarily distinct from the pelagophytes (2B). It is possible that the haptophyte plastid may have been acquired through the secondary endosymbiosis of a different lineage of red algae to the ochrophyte, either via a cryptomonad intermediate (2C) or directly (2D).

DOI: [10.7554/eLife.23717.051](https://doi.org/10.7554/eLife.23717.051)
