# Supplementary material for: Chimeric origins of ochrophytes and haptophytes revealed through an ancient plastid proteome
Source: eLife journal article supplement (doi:10.7554/elife.23717), 2017-05-12

**Fig. 8- figure supplement 1. Origin of proteins of ochrophyte origin in different CASH lineages.** This figure profiles the evolutionary origins of proteins inferred by single-gene phylogenetic analysis to have been transferred from the ochrophytes into other lineages that have acquired plastids through secondary or more complex endosymbioses. Proteins are divided into the three major ochrophyte lineages (i.e. diatoms, chrysista, and hypogyristea); all remaining proteins (inferred to have been acquired from an ancestor of multiple ochrophyte lineages, or of ambiguous but clearly ochrophyte origin) are grouped as a final category. The haptophyte proteins that could be attributed to a specific ochrophyte lineage are particularly skewed (100/178 proteins) to origins within the hypogyristea.

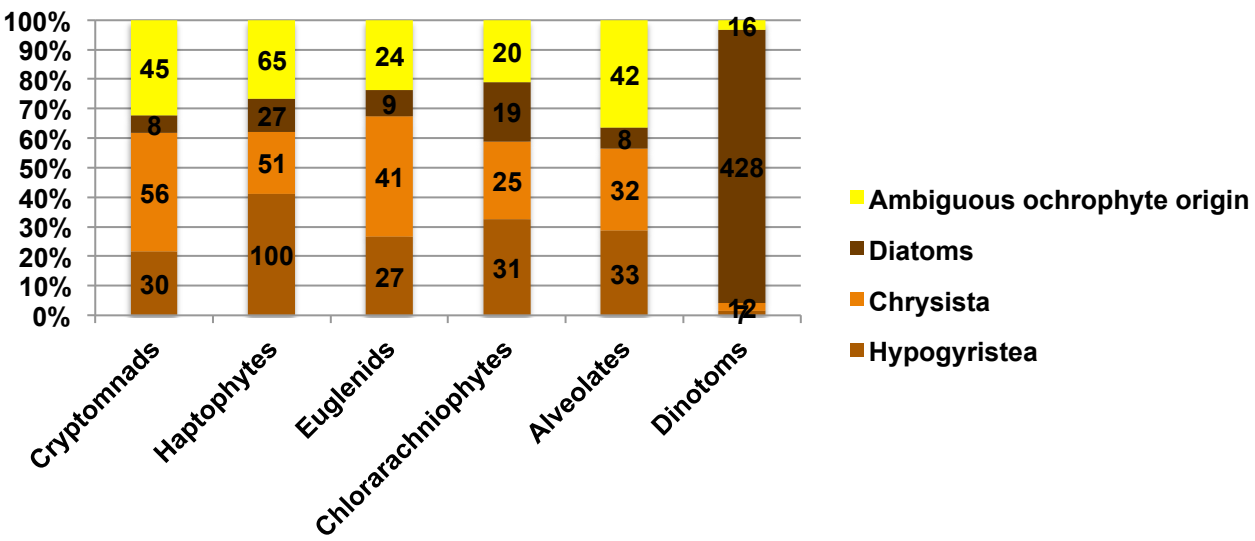

Supplement: supp [file elife_poa_e23717_Figure8_Supplement_1.pdf › elife_poa_e23717_Figure8_Supplement_1.pdf]
