# Supplementary material for: Chimeric origins of ochrophytes and haptophytes revealed through an ancient plastid proteome
Source: eLife journal article supplement (doi:10.7554/elife.23717), 2017-05-12
Supplement: supp [file elife_poa_e23717_Figure_2_Supplement_1.pdf › elife_poa_e23717_Figure_2_Supplement_1.pdf]

**Fig. 2- figure supplement 1- Exemplar ochrophyte plastid protein alignments.** This figure shows untrimmed GeneIOUS alignments for two ancestral HPPGs of unusual provenance. In each case the full length of the protein (labelled i) and N-terminal region only (ii) are shown, demonstrating the broad conservation of the N-terminus position. Sequences for which exemplar targeting constructs (*Phaeodactylum tricornutum*, *Nannochloropsis gaditana*, *Glenodinium foliaceum*) are shown at the top of each alignment.

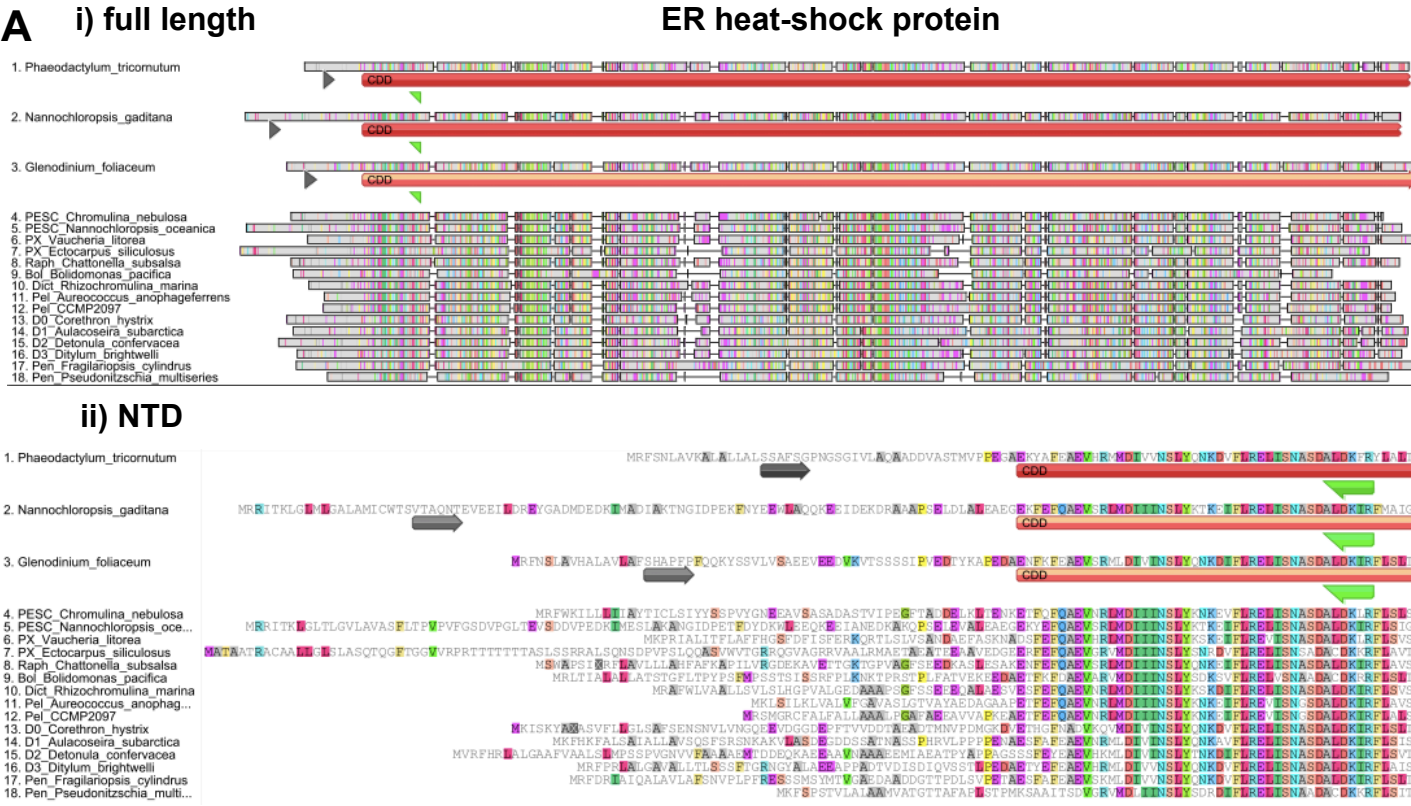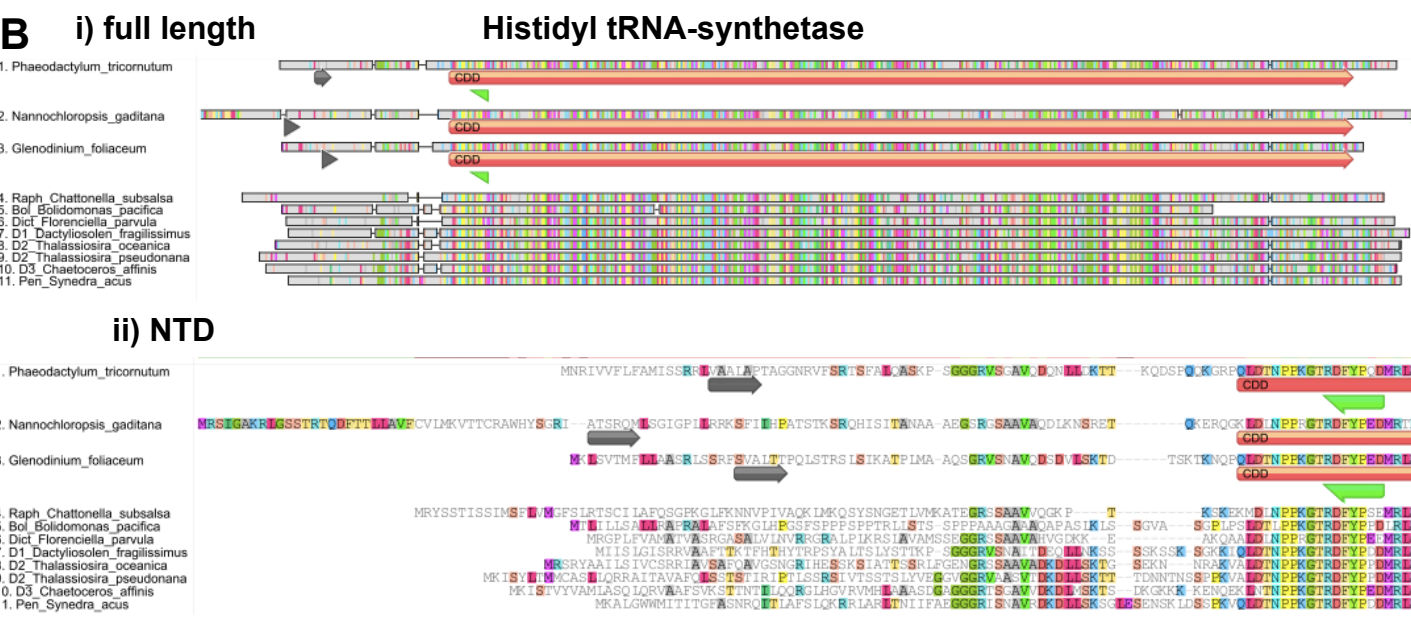

**Key**

→ ASAFAP motif

→ Conserved domain

← Position of PCR reverse primer
