# Supplementary material for: Chimeric origins of ochrophytes and haptophytes revealed through an ancient plastid proteome
Source: eLife journal article supplement (doi:10.7554/elife.23717), 2017-05-12

**Figure 2- figure supplement 4. Tree of a novel ochrophyte plastid-targeted protein.**

This tree shows the consensus Bayesian topology inferred for a 16 taxa x 103 aa alignment of a plastid-targeted protein seemingly restricted to ochrophytes and one dinoflagellate lineage. Taxa are labelled and support values are shown as per fig. 2- figure supplement 2.

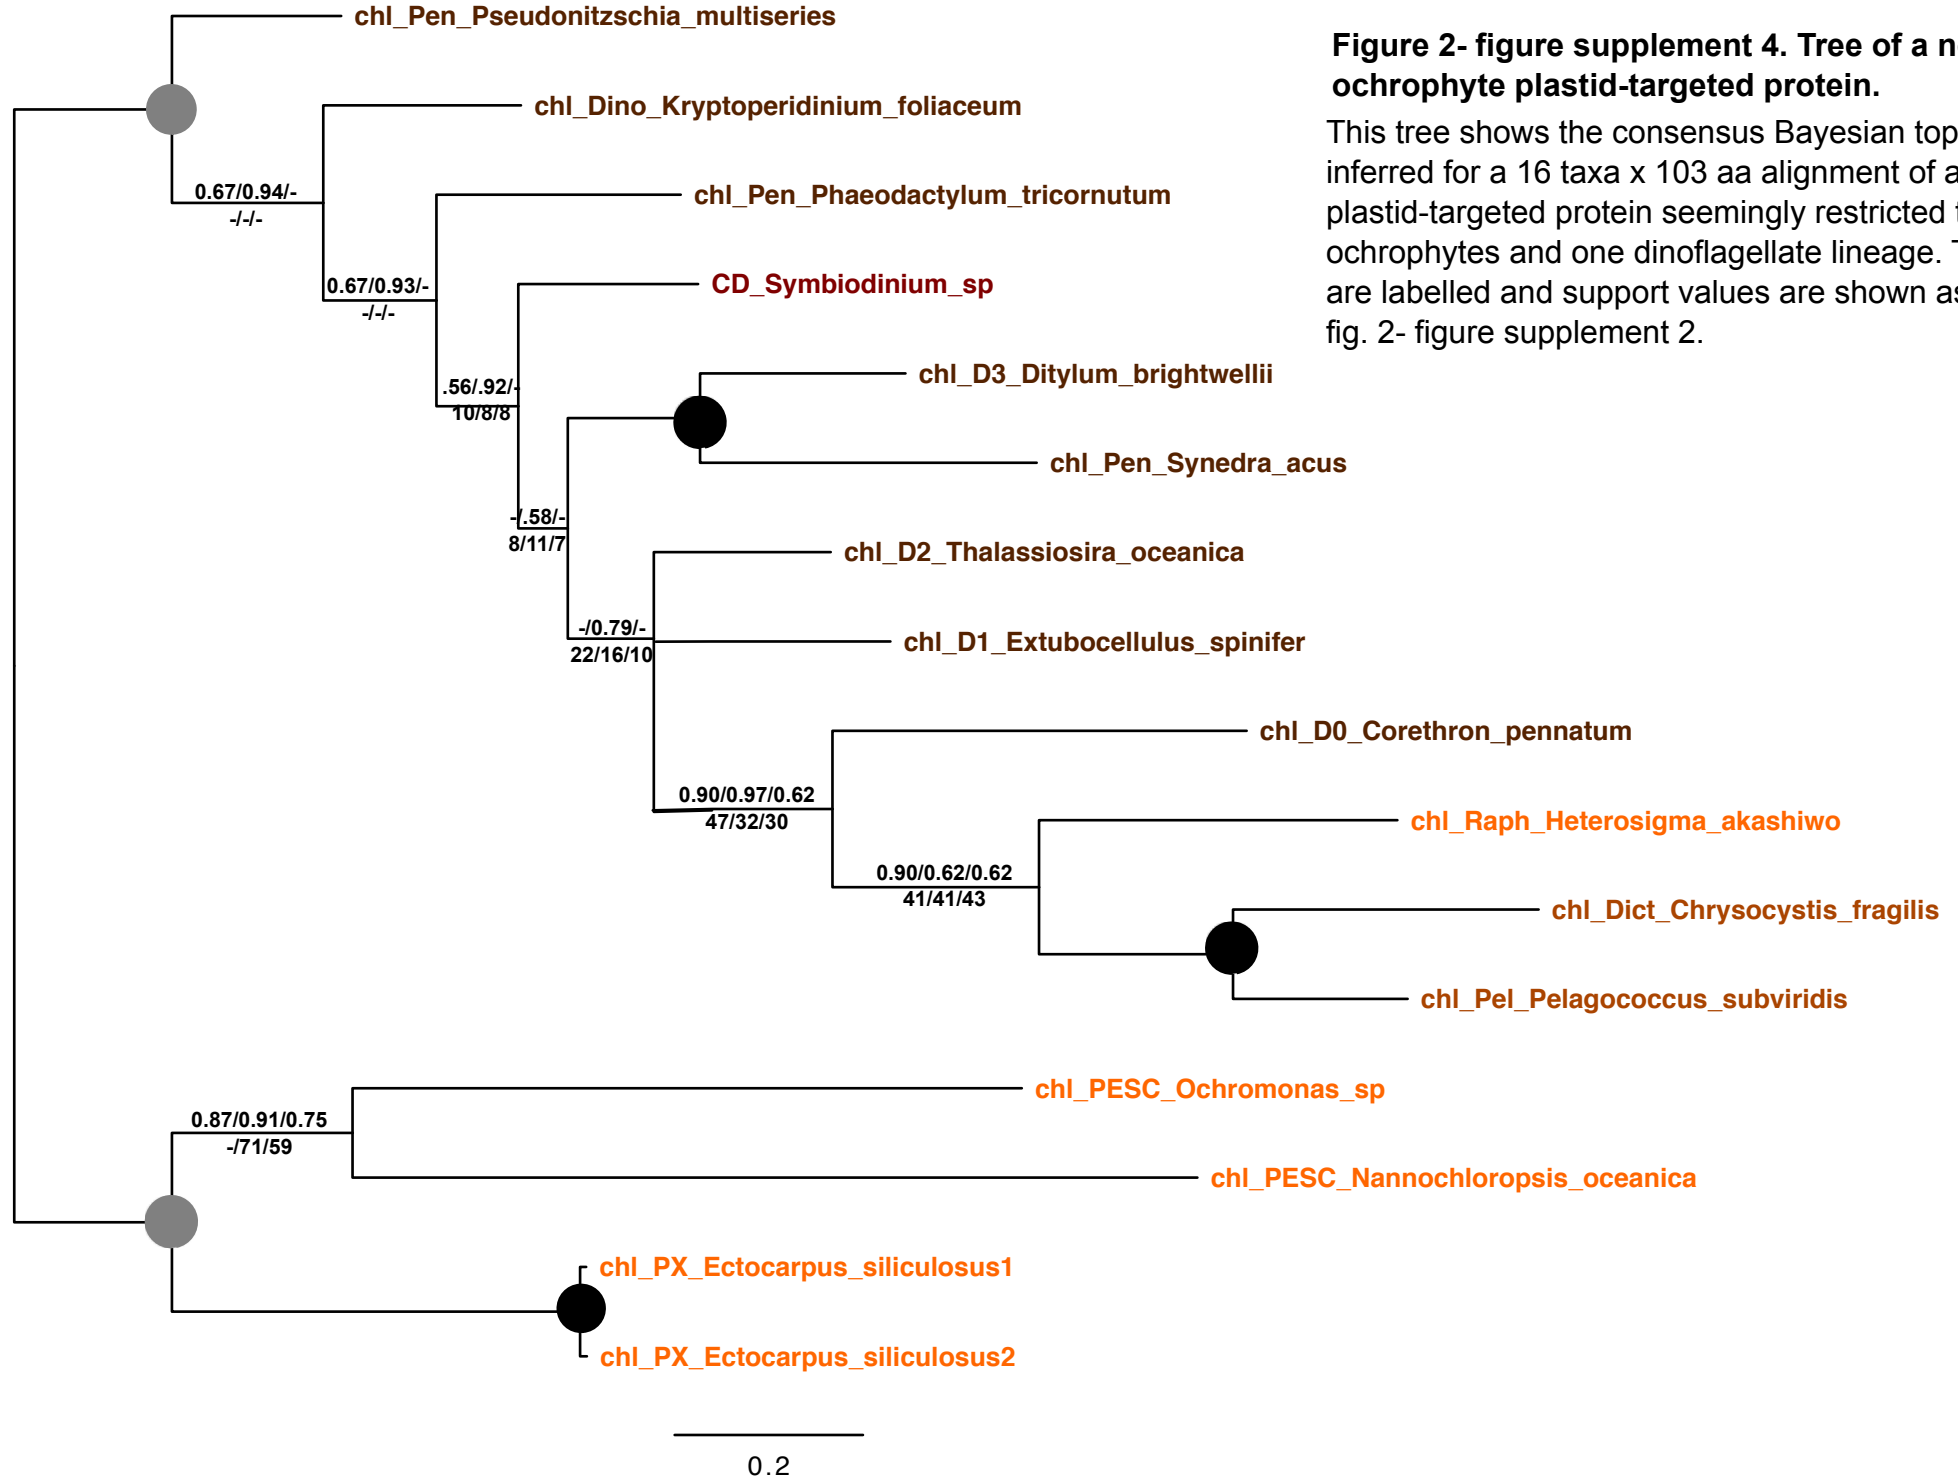

Supplement: supp [file elife_poa_e23717_Figure_2_Supplement_4.pdf › elife_poa_e23717_Figure_2_Supplement_4.pdf]
