# Supplementary material for: Chimeric origins of ochrophytes and haptophytes revealed through an ancient plastid proteome
Source: eLife journal article supplement (doi:10.7554/elife.23717), 2017-05-12

**Fig. 2- figure supplement 5. Multipartite *Phaeodactylum* plastid-targeted proteins.** This figure shows the localisation of GFP overexpression constructs for copies of seven proteins from the diatom *Phaeodactylum tricornutum* that are of non-plastid origin, but show multipartite localisation to the plastid and one other organelle (the mitochondria, or in the case of the “ER heat shock protein” to the endoplasmic reticulum).

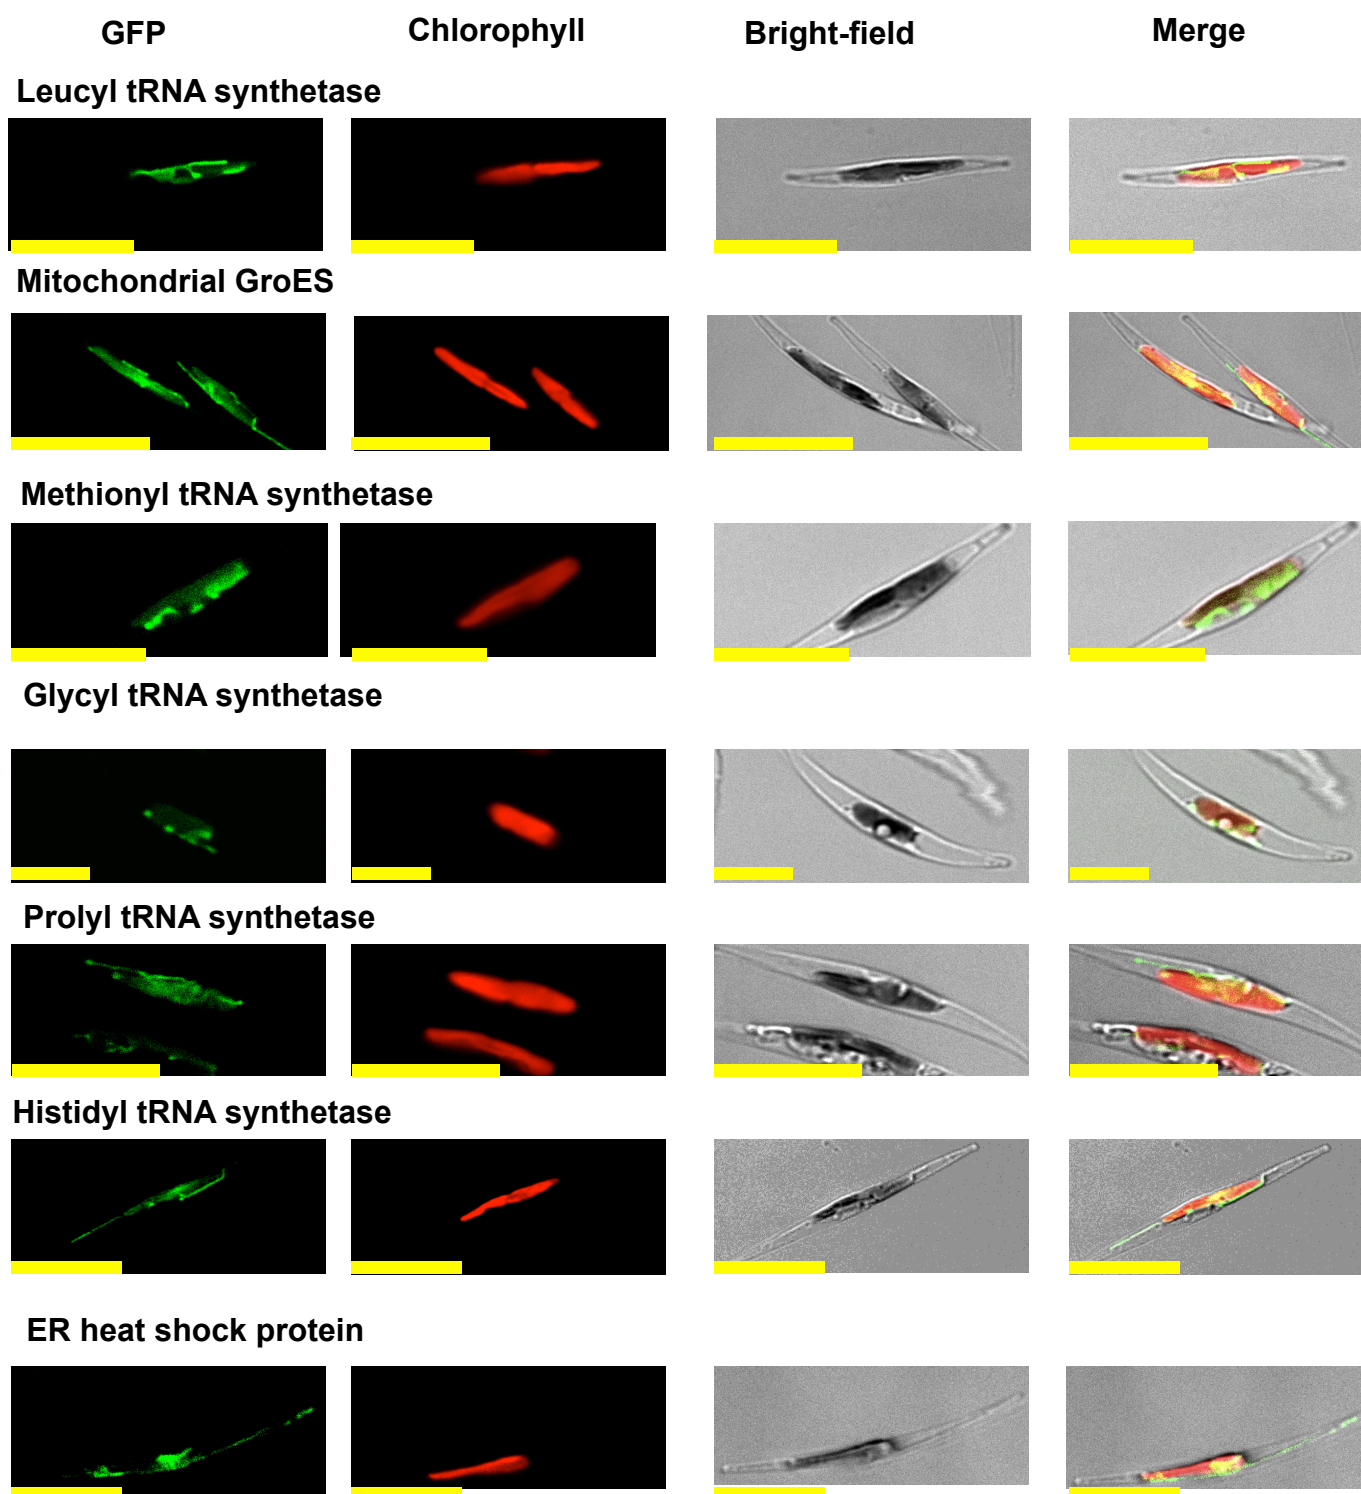

Supplement: supp [file elife_poa_e23717_Figure_2_Supplement_5.pdf › elife_poa_e23717_Figure_2_Supplement_5.pdf]
