# Supplementary material for: Chimeric origins of ochrophytes and haptophytes revealed through an ancient plastid proteome
Source: eLife journal article supplement (doi:10.7554/elife.23717), 2017-05-12

**Fig. 2- figure supplement 6.Heterologous expression constructs of multipartite plastid-targeted proteins.** This figure shows the localisation of GFP overexpression constructs for copies of two proteins from the dinotom *Glenodinium foliaceum* (**Panel A**) , and three proteins from the eustigmatophyte *Nannochloropsis gaditana* (**Panel B**) that are of non-plastid origin, but show multipartite localisation to the plastid and one other organelle, per Fig. 2, figure supplement 5.

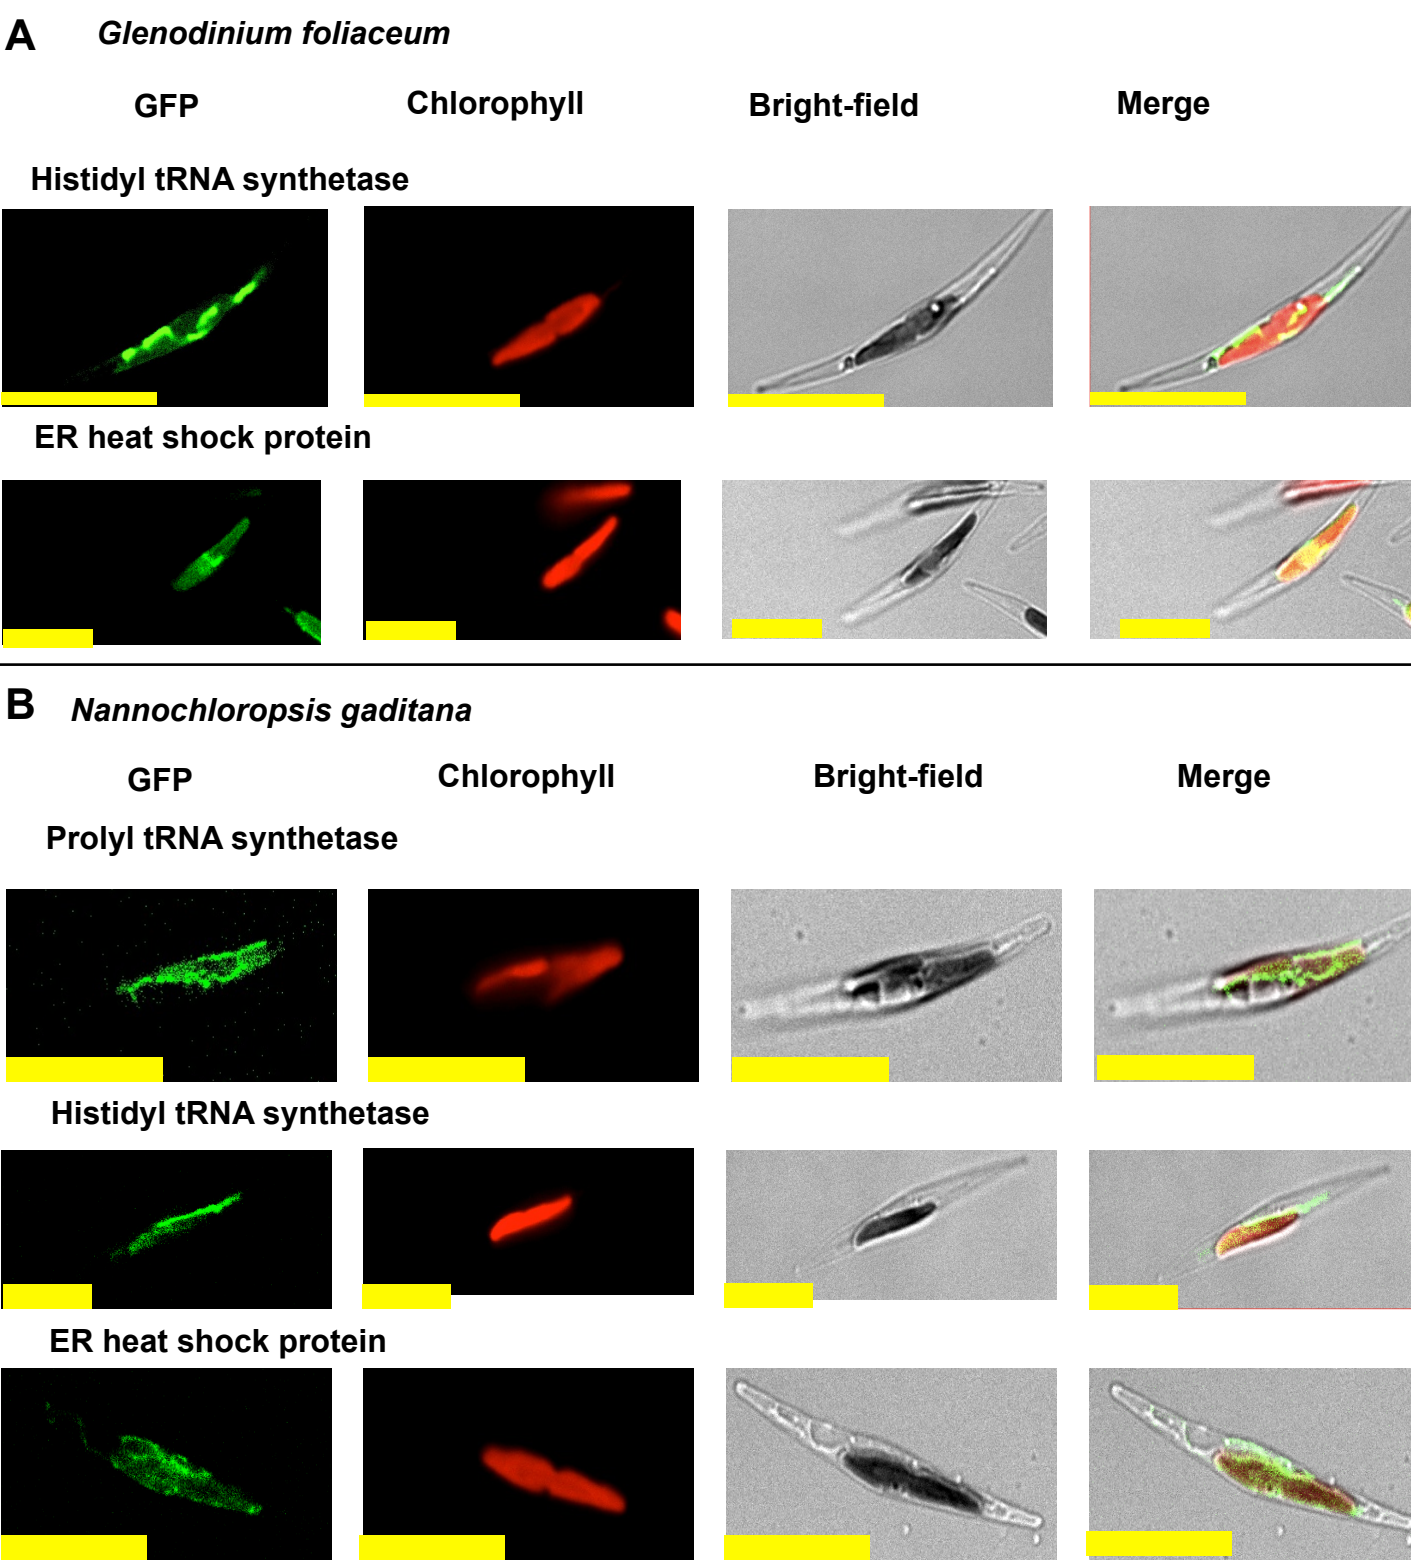

Supplement: supp [file elife_poa_e23717_Figure_2_Supplement_6.pdf › elife_poa_e23717_Figure_2_Supplement_6.pdf]
