# Supplementary material for: Chimeric origins of ochrophytes and haptophytes revealed through an ancient plastid proteome
Source: eLife journal article supplement (doi:10.7554/elife.23717), 2017-05-12

**Fig. 2- figure supplement 7. Exemplar control images for confocal microscopy.** This figure shows fluorescence patterns for wild-type *Phaeodactylum tricornutum* cells (i), and transformant *Phaeodactylum* cells expressing GFP that has not been fused to any N-terminal targeting sequence (ii), both visualised under the same conditions used for all other transformant cultures.

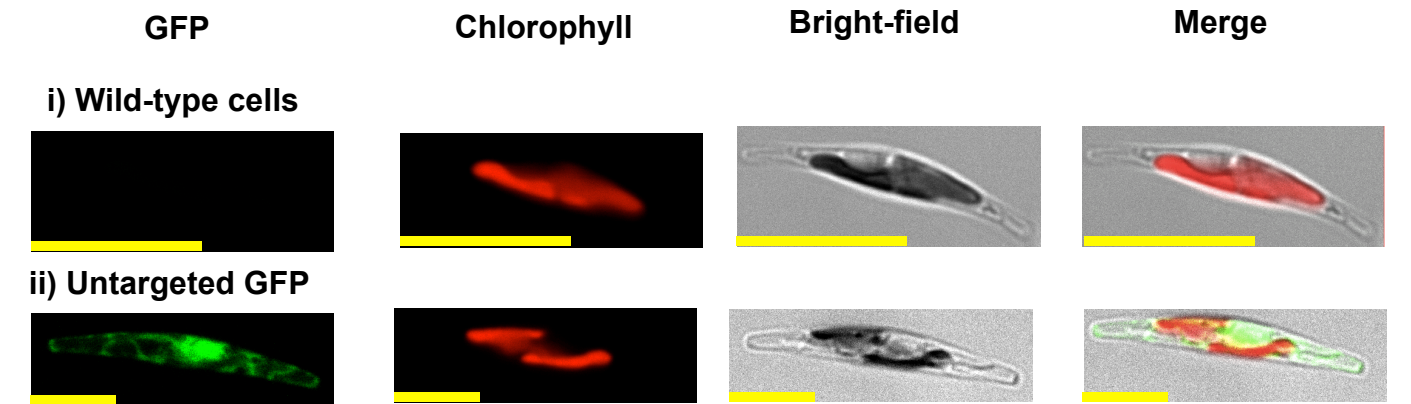

Supplement: supp [file elife_poa_e23717_Figure_2_Supplement_7.pdf › elife_poa_e23717_Figure_2_Supplement_7.pdf]
