# Supplementary material for: Chimeric origins of ochrophytes and haptophytes revealed through an ancient plastid proteome
Source: eLife journal article supplement (doi:10.7554/elife.23717), 2017-05-12

**Fig. 4- figure supplement 1. Sampling richness associated with ancestral HPPGs of green algal origin.** This figure shows the number of sub-different archaeplastid orthologues for ancestral HPPGs verified by combined BLAST top hit and single-gene tree analysis to be of either green algal origin (green bars) or red algal origin (red bars), for which glaucophyte orthologues could also be identified.

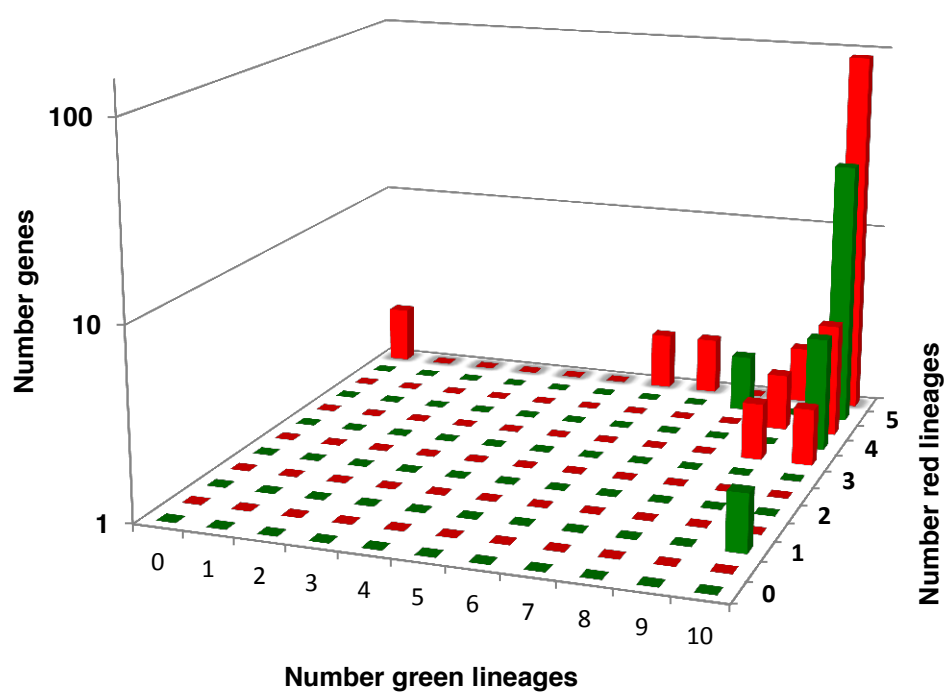

Supplement: supp [file elife_poa_e23717_Figure_4_Supplement_1.pdf › elife_poa_e23717_Figure_4_Supplement_1.pdf]
