# Supplementary material for: Chimeric origins of ochrophytes and haptophytes revealed through an ancient plastid proteome
Source: eLife journal article supplement (doi:10.7554/elife.23717), 2017-05-12

**Fig.4- figure supplement 2. Heatmaps of nearest sister-groups of ancestral HPPGs of verified green origin.** This figure shows the specific topologies of single gene trees for HPPGs verified to be of green origin by combined BLAST and phylogenetic analysis. **Panel A** shows a reference topology of evolutionary relationships between green lineages, defined as per Leliaert et al. 2011. Six ancestral nodes that might correspond to the origin point of ochrophyte HPPGs are labelled with coloured boxes. **Panel B** shows the presence and absence of each green sub-category in the immediate sister-group to the ochrophyte HPPG in each single tree of HPPGs of verified origin. HPPGs are grouped by the inferred origin point within the green algae, with the number of HPPGs identified for each origin point given with round brackets.

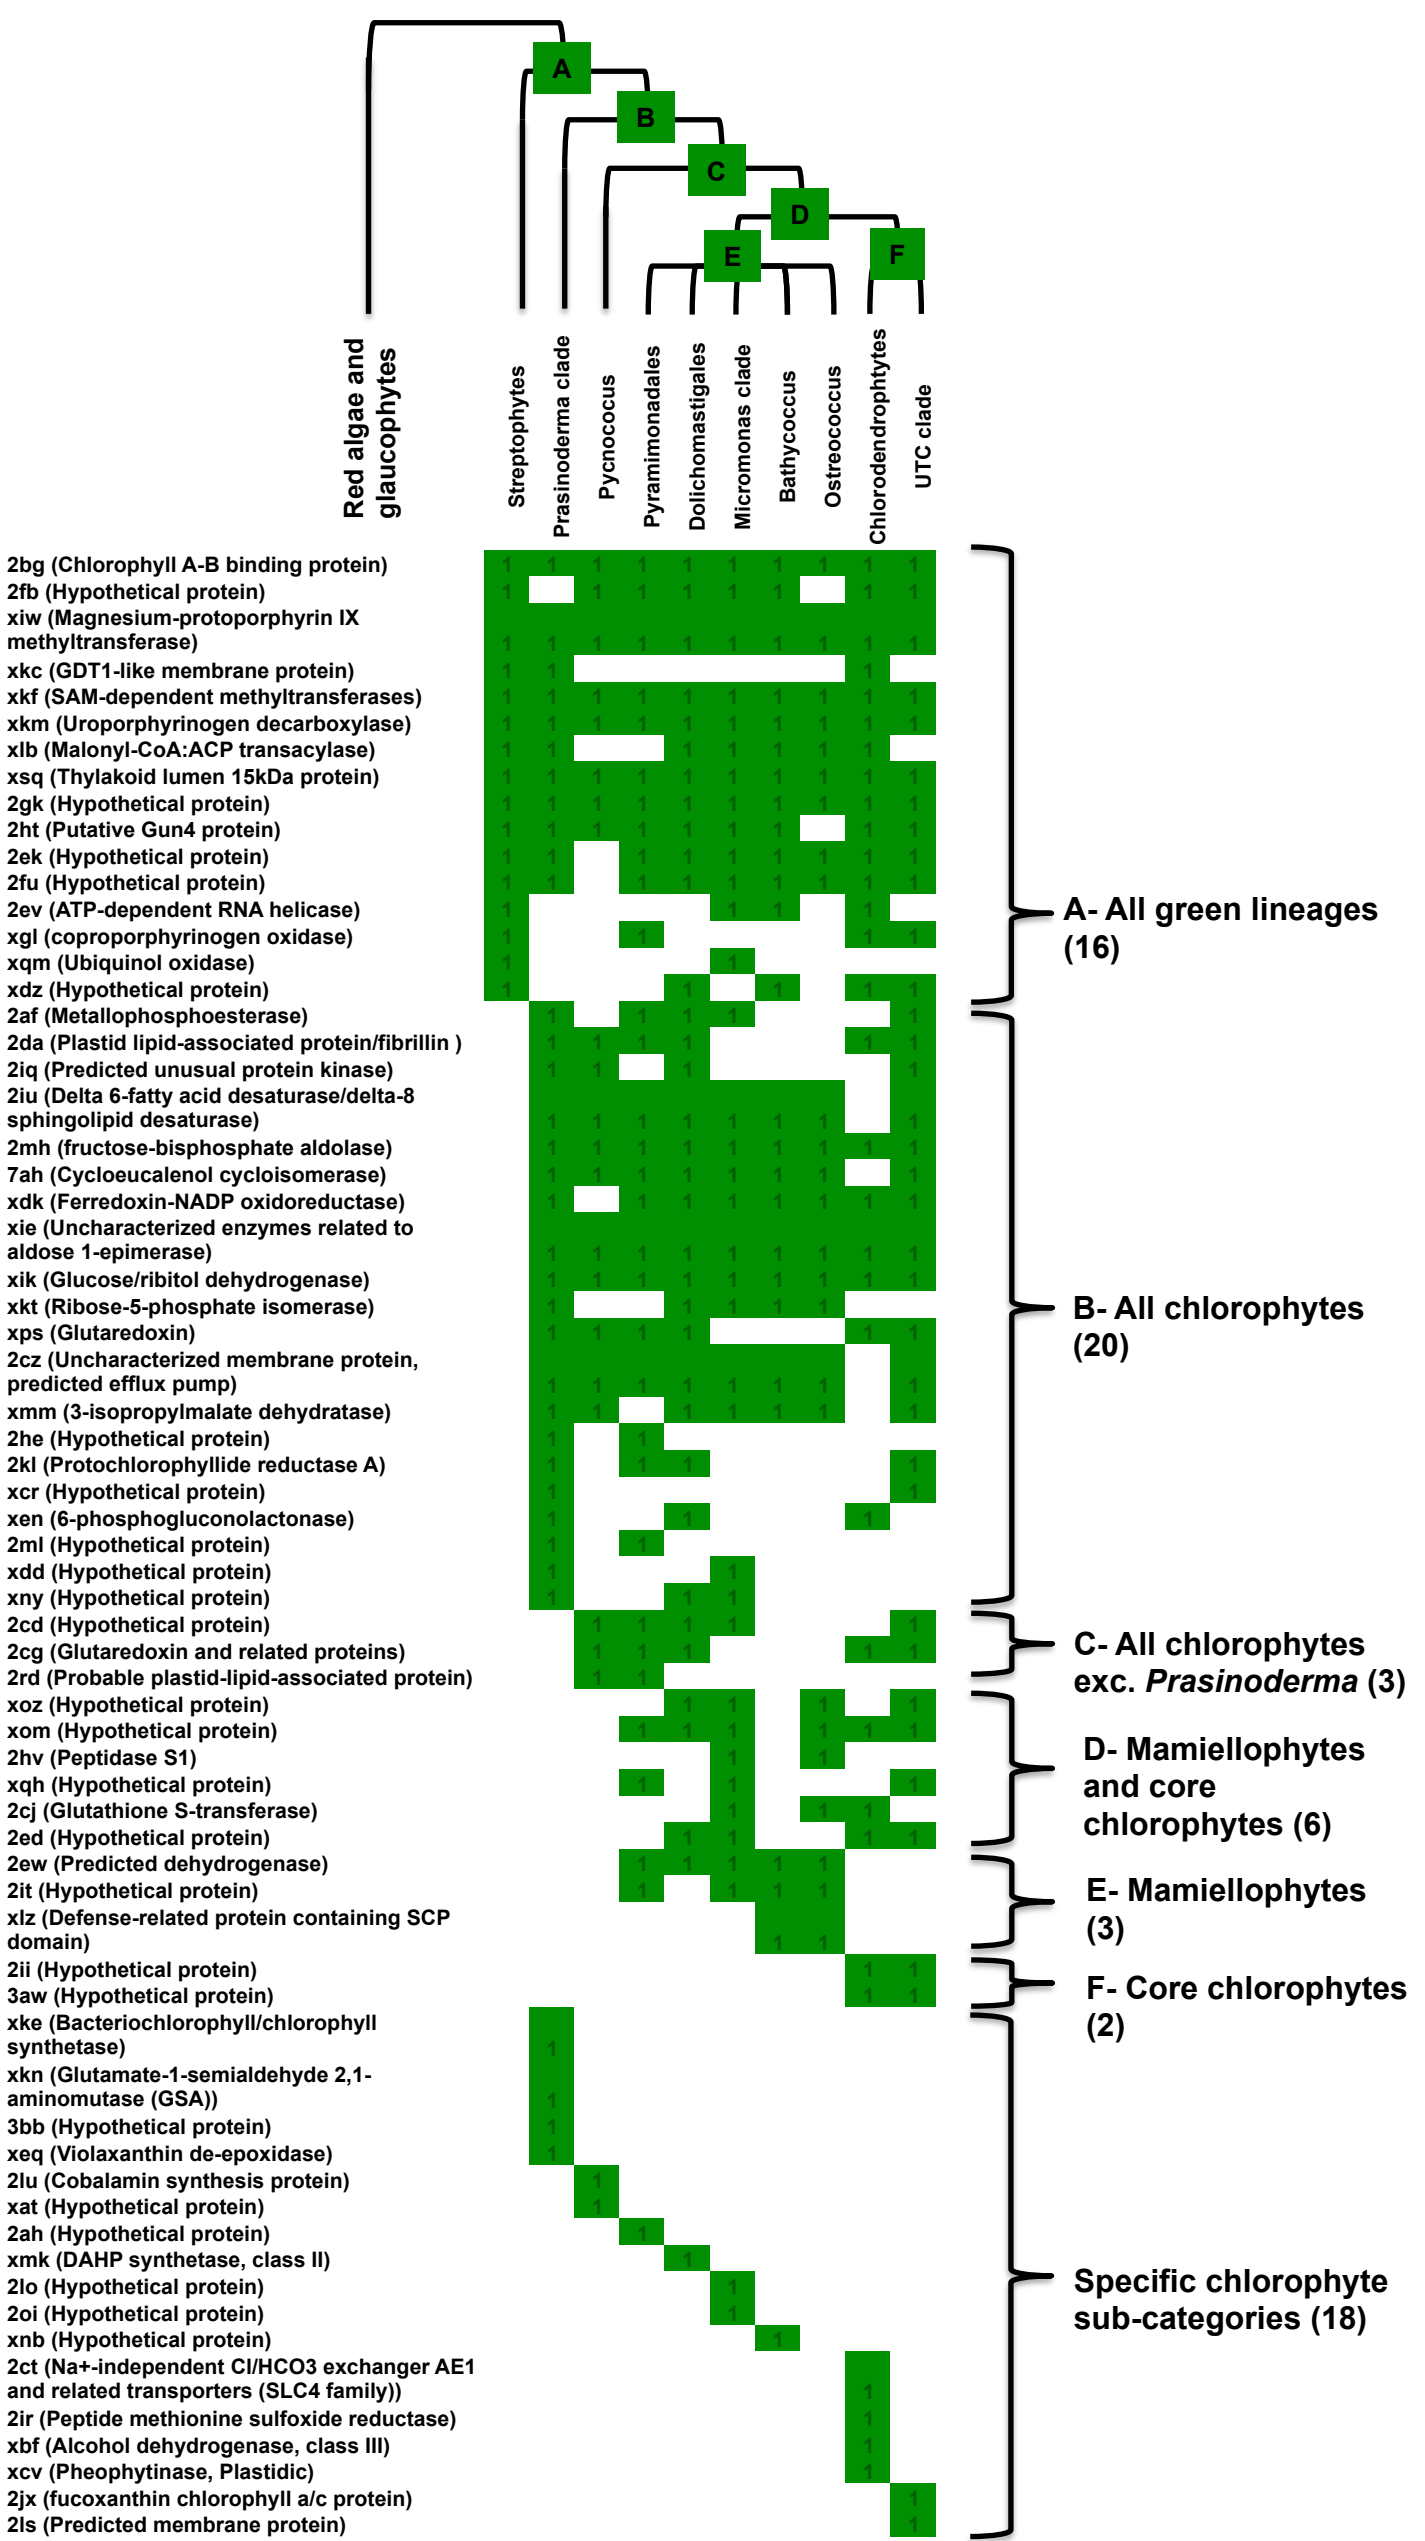

Supplement: supp [file elife_poa_e23717_Figure_4_Supplement_2.pdf › elife_poa_e23717_Figure_4_Supplement_2.pdf]
