# Supplementary material for: Chimeric origins of ochrophytes and haptophytes revealed through an ancient plastid proteome
Source: eLife journal article supplement (doi:10.7554/elife.23717), 2017-05-12

**Fig. 4- figure supplement 3. Specific origins of green HPPGs as inferred from BLAST top hit analyses.** These charts show (i) the number of BLAST top hits against each of the individual green sub-categories from HPPGs for which a green origin was identified both from BLAST top hit and single-gene tree analysis, and (ii) the total number of non-redundant sequences from each green sub-category included in the BLAST library.

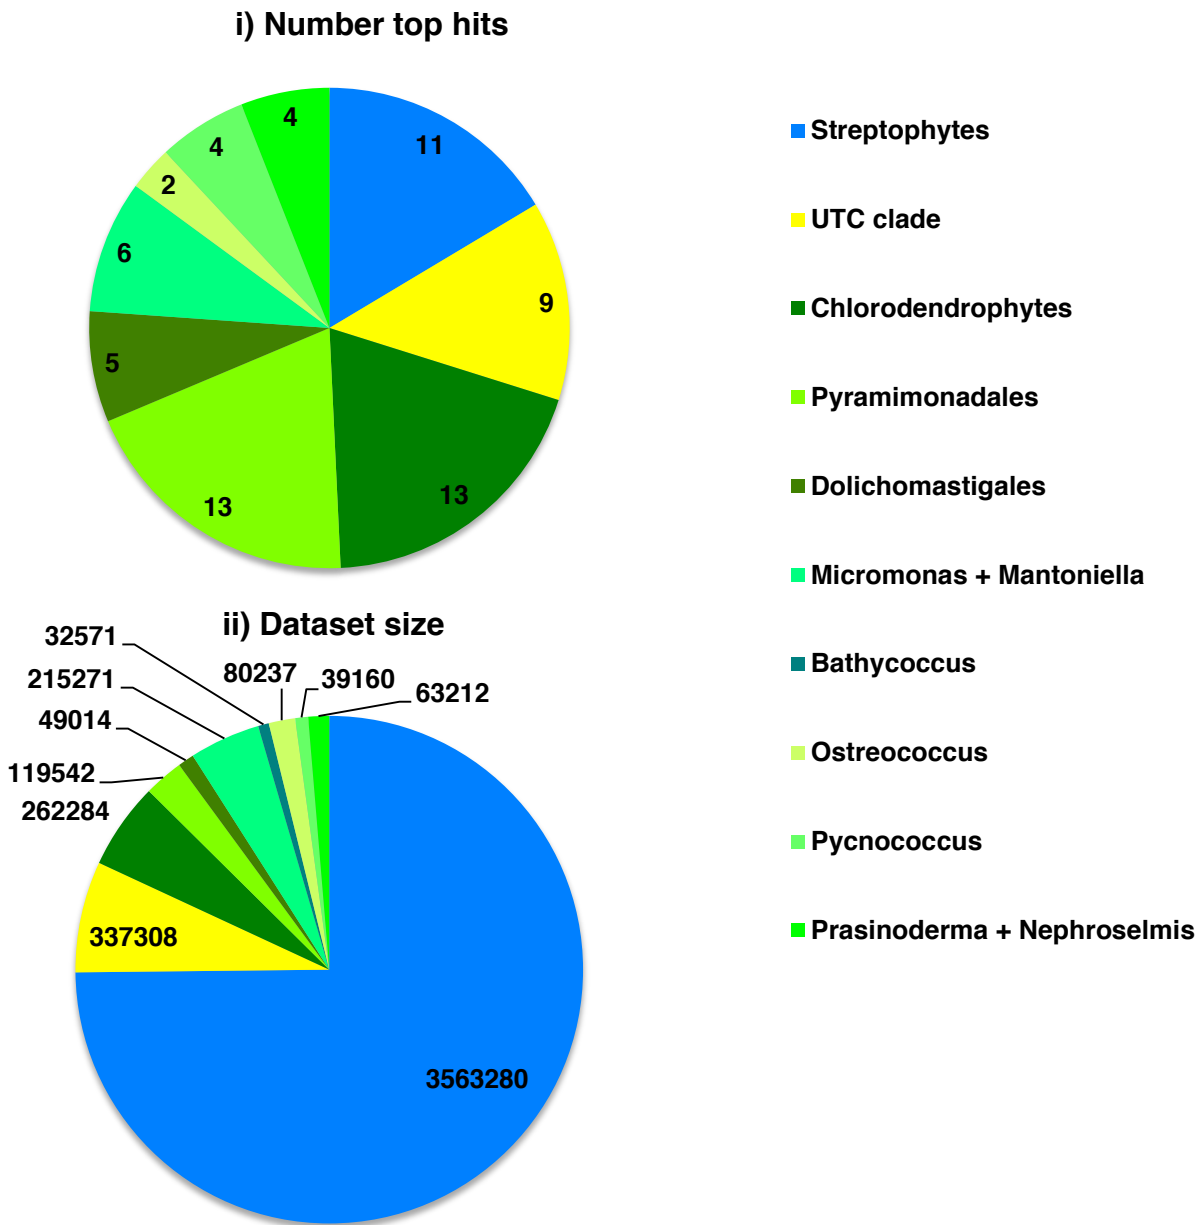

Supplement: supp [file elife_poa_e23717_Figure_4_Supplement_3.pdf › elife_poa_e23717_Figure_4_Supplement_3.pdf]
