# Supplementary material for: Chimeric origins of ochrophytes and haptophytes revealed through an ancient plastid proteome
Source: eLife journal article supplement (doi:10.7554/elife.23717), 2017-05-12

**Fig. 4- figure supplement 5. Origins and HECTAR based targeting tests of proteins encoded by conserved ochrophyte gene clusters.** **Panel A** shows the most probably evolutionary origin, identified using BLAST top hit analysis, for 7140 conserved gene clusters inferred to have been present in the last common ochrophyte ancestor. **Panel B** shows the number of these gene familieies that are predicted by HECTAR to encode proteins targeted to the plastid, subdivided by probable evolutionary origin, and the number expected to be present in each category assuming a random distribution of plastid-targeted proteins across the entire dataset, independent of evolutionary origin. Categories inferred to be significantly enriched above the expected values are labelled with black arrows.

**A**

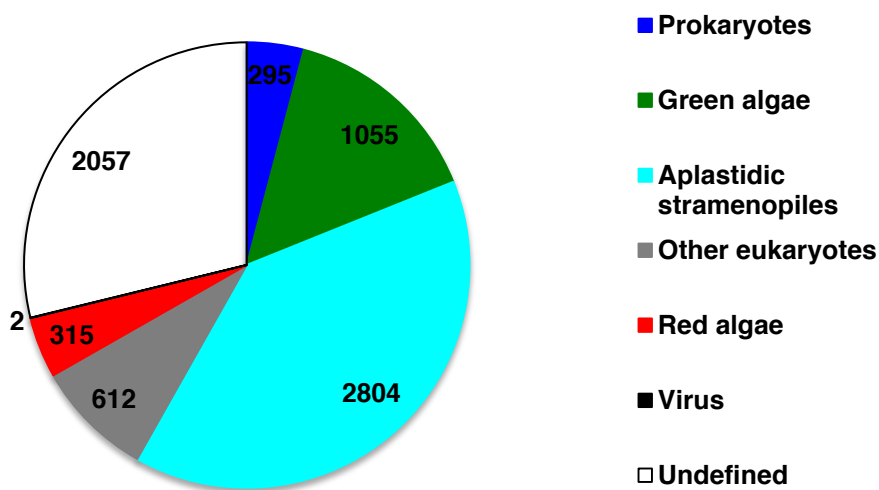

**B**

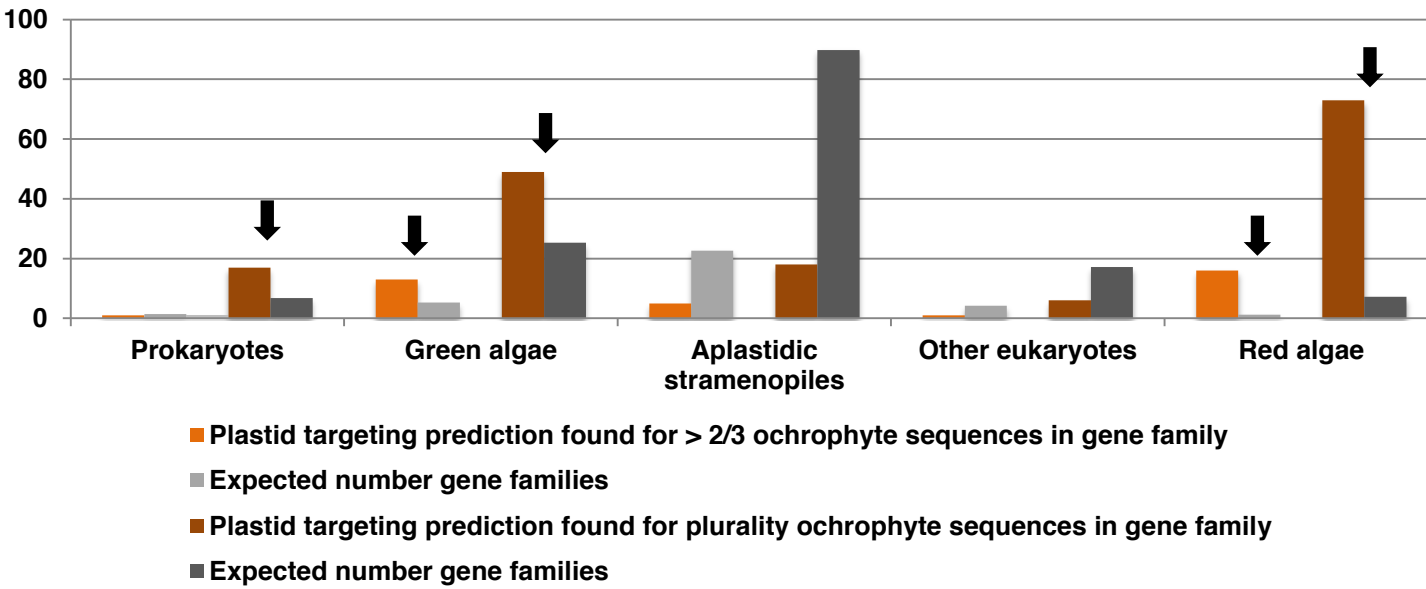

Supplement: supp [file elife_poa_e23717_Figure_4_Supplement_5.pdf › elife_poa_e23717_Figure_4_Supplement_5.pdf]
