# Supplementary material for: Chimeric origins of ochrophytes and haptophytes revealed through an ancient plastid proteome
Source: eLife journal article supplement (doi:10.7554/elife.23717), 2017-05-12
Supplement: supp [file elife_poa_e23717_Figure_5_Supplement_1.pdf › elife_poa_e23717_Figure_5_Supplement_1.pdf]

**Fig. 5- figure supplement 1. Reconstructed metabolism pathways and core biological processes in the ancestral ochrophyte plastid.**

This figure tabulates each of the ancestral ochrophyte HPPGs corresponding to 350 central plastid metabolism and other biological processes. The "origin" column shows the probable evolutionary source for each HPPG as defined by combined BLAST tophit and single-gene tree analysis. The origin of each ancestral HPPG is either assigned a "high confidence" value (in which the same origin was robustly supported both by single-gene tree and by BLAST tophit analysis) or a "low confidence" value (in the absence of robust and consistent support through both techniques; corresponding to the tree sister-group if one could be clearly assigned, or the BLAST tophit identity if not). A dash indicates the corresponding protein was not identified in the ancestral HPPG dataset due to either being plastid-encoded or alternative reasons; detailed explanations for the enzymes that are neither plastid-encoded nor detected in the ancestral HPPG dataset are provided in figure supplement 2.

| Key                                                     |                                                  | Origin      |                                                         | Confidence                                              |             |
|---------------------------------------------------------|--------------------------------------------------|-------------|---------------------------------------------------------|---------------------------------------------------------|-------------|
|                                                         |                                                  |             |                                                         | High                                                    | Low         |
|                                                         |                                                  |             |                                                         | <div></div>                                             | <div></div> |
|                                                         |                                                  |             |                                                         | <div></div>                                             | <div></div> |
|                                                         |                                                  |             |                                                         | <div></div>                                             | <div></div> |
|                                                         |                                                  |             |                                                         | <div></div>                                             | <div></div> |
|                                                         |                                                  |             |                                                         | <div></div>                                             | <div></div> |
|                                                         |                                                  |             |                                                         | <div></div>                                             | <div></div> |
| Cluster                                                 | Enzyme                                           | Origin      | Cluster                                                 | Enzyme                                                  | Origin      |
| 1. Light harvesting                                     |                                                  |             |                                                         |                                                         |             |
| 2ka                                                     | Divergent li818-type                             | <div></div> | 4. Fatty acid biosynthesis                              |                                                         |             |
| xhu                                                     | High light inducible protein                     | <div></div> | a) Fatty acid synthesis                                 |                                                         |             |
| 2kb                                                     | LhcA-type protein 1                              | <div></div> | xlv                                                     | Long-chain acyl-CoA transporter                         | <div></div> |
| 2kd                                                     | LhcA-type protein 2                              | <div></div> | xjx                                                     | Long-chain acyl-CoA synthetase                          | <div></div> |
| 2kc                                                     | LhcA-type protein 3                              | <div></div> | xpy                                                     | Acetyl-coA:carboxylase                                  | <div></div> |
| 2ke                                                     | LhcA-type protein 4                              | <div></div> | xlb                                                     | Malonyl-CoA:ACP transacylase                            | <div></div> |
| 2jx                                                     | LhcF-type protein 1                              | <div></div> | xph                                                     | Beta-ketoacyl synthase                                  | <div></div> |
| 2jw                                                     | LhcF-type protein 2                              | <div></div> | abx                                                     | Beta-ketoacyl-ACP reductase                             | <div></div> |
| 2jz                                                     | LhcF-type protein 3                              | <div></div> | xik                                                     | Enoyl: ACP reductase                                    | <div></div> |
| 2kf                                                     | LhcR-type protein 1                              | <div></div> | 2ig                                                     | Long chain fatty acid elongase 1                        | <div></div> |
| abj                                                     | LhcR-type protein 2                              | <div></div> | 2qi                                                     | Long chain fatty acid elongase 2                        | <div></div> |
| 2kh                                                     | LhcR-type protein 3                              | <div></div> | 2ge                                                     | Fatty acid desaturase 1                                 | <div></div> |
| abk                                                     | LhcR-type protein 4                              | <div></div> | 2iu                                                     | Fatty acid desaturase 2                                 | <div></div> |
| 2bg                                                     | Li818-type                                       | <div></div> | 2jh                                                     | Fatty acid desaturase 3                                 | <div></div> |
| 2. Photosynthesis                                       |                                                  |             |                                                         |                                                         |             |
| -                                                       | PsbA,B,C,D,E,F,H,I,J,K,L,N,T,V,W,X,Y,Z           | <div></div> | b) Glycerol metabolism                                  |                                                         |             |
| xmo                                                     | PsbU                                             | <div></div> | 2ky                                                     | Glycerol-3-phosphate dehydrogenase                      | <div></div> |
| xhz                                                     | Psb27                                            | <div></div> | 2kn                                                     | Glyceraldehyde 3-phosphate dehydrogenase                | <div></div> |
| 2ax                                                     | PsbP                                             | <div></div> | 5. Tetrapyrrole biosynthesis                            |                                                         |             |
| 2dx                                                     | Psb31                                            | <div></div> | a) Common branch                                        |                                                         |             |
| abn                                                     | Psb31                                            | <div></div> | 2ol                                                     | Glutamyl-tRNA synthetase                                | <div></div> |
| 2gd                                                     | PsbP                                             | <div></div> | aai                                                     | Glutamyl-tRNA reductase                                 | <div></div> |
| 2js                                                     | PsbM                                             | <div></div> | xkn                                                     | Glutamate-1-semialdehyde 2,1-aminomutase (GSA)          | <div></div> |
| xkb                                                     | PsbO                                             | <div></div> | xin                                                     | Delta-aminolevulinic acid dehydratase                   | <div></div> |
| 2jn                                                     | PsbQ                                             | <div></div> | xjr                                                     | Porphobilinogen deaminase                               | <div></div> |
| 2am                                                     | PsbW superfamily                                 | <div></div> | 2be                                                     | Uroporphyrin III synthase                               | <div></div> |
| abo                                                     | PsbW superfamily                                 | <div></div> | 2nc                                                     | Uroporphyrinogen decarboxylase 1                        | <div></div> |
| 2fd                                                     | Psb29                                            | <div></div> | xjh                                                     | Uroporphyrinogen decarboxylase 2                        | <div></div> |
| -                                                       | PetA,B,D,G,L,M,N                                 | <div></div> | xkm                                                     | Uroporphyrinogen decarboxylase 3                        | <div></div> |
| xcc                                                     | petC                                             | <div></div> | xgl                                                     | Coproporphyrinogen III oxidase 1                        | <div></div> |
| 2ai                                                     | petJ/ cytochrome c6                              | <div></div> | xls                                                     | Coproporphyrinogen III oxidase 2                        | <div></div> |
| xmc                                                     | CPLD51 protein required for cyt b6 assembly      | <div></div> | 4gz                                                     | Protoporphyrinogen oxidase                              | <div></div> |
| -                                                       | PsaA,B,C,D,E,F,I,J,L,M                           | <div></div> | b) Chlorophyll branch                                   |                                                         |             |
| xqz                                                     | PSI subunit 223993351                            | <div></div> | xnp                                                     | Magnesium chelatase subunit D                           | <div></div> |
| 2dv                                                     | Ferredoxin 1                                     | <div></div> | xks                                                     | Magnesium chelatase subunit H                           | <div></div> |
| xlg                                                     | Ferredoxin 2                                     | <div></div> | -                                                       | Magnesium chelatase subunit I                           | <div></div> |
| xnv                                                     | Ferredoxin 3                                     | <div></div> | xiw                                                     | Magnesium-PPIX methyltransferase                        | <div></div> |
| 2lt                                                     | Ferredoxin rieske component                      | <div></div> | -                                                       | Magnesium-PPIX methylmonoester cyclase                  | <div></div> |
| xdk                                                     | Ferredoxin-NADP oxidoreductase 1                 | <div></div> | 2kl                                                     | Protochlorophyllide reductase A                         | <div></div> |
| 2do                                                     | Ferredoxin-NADP oxidoreductase 2                 | <div></div> | xmw                                                     | 3,8-divinyl protochlorophyllide a 8-vinyl reductase     | <div></div> |
| xln                                                     | Plastoquinol terminal oxidase                    | <div></div> | xke                                                     | Chlorophyll synthetase                                  | <div></div> |
| xla                                                     | Photosystem II assembly factor Hcf136            | <div></div> | c) Haem branch                                          |                                                         |             |
| xqz                                                     | PsaO                                             | <div></div> | xjs                                                     | Ferrochelatase                                          | <div></div> |
| 2bh                                                     | PGR5 protein                                     | <div></div> | 2kr                                                     | haem oxygenase 1                                        | <div></div> |
| xpd                                                     | PGR5-like protein                                | <div></div> | 2ks                                                     | haem oxygenase 2                                        | <div></div> |
| -                                                       | atpA,B,D,E,F,G,H,I                               | <div></div> | xjj                                                     | haem transporter                                        | <div></div> |
| xkk                                                     | atpC                                             | <div></div> | d) Catabolism                                           |                                                         |             |
| 3. Central carbon metabolism                            |                                                  |             |                                                         |                                                         |             |
| a) CBB cycle                                            |                                                  |             |                                                         |                                                         |             |
| -                                                       | Rubisco large subunit                            | <div></div> | 6. Carotenoid biosynthesis                              |                                                         |             |
| -                                                       | Rubisco small subunit                            | <div></div> | 2mc                                                     | Deoxyxylulose-5-phosphate synthase                      | <div></div> |
| 2eg                                                     | Rubisco small subunit N-methyltransferase I      | <div></div> | xif                                                     | 1-deoxy-D-xylulose 5-phosphate reductoisomerase         | <div></div> |
| xms                                                     | 3-phosphoglycerate kinase                        | <div></div> | xlf                                                     | 4-diphosphocytidyl-2C-methyl-D-erythritol synthase      | <div></div> |
| 2kn                                                     | Glyceraldehyde 3-phosphate dehydrogenase         | <div></div> | xob                                                     | 4-diphosphocytidyl-2C-methyl-D-erythritol kinase        | <div></div> |
| xip                                                     | Triosephosphate isomerase                        | <div></div> | xos                                                     | 2C-methyl-D-erythritol 2,4-cyclodiphosphate synthase    | <div></div> |
| 2mh                                                     | Fructose-bisphosphate aldolase                   | <div></div> | 2bp                                                     | 1-hydroxy-2-methyl-2-(E)-butenyl-4-diphosphate synthase | <div></div> |
| -                                                       | Sedoheptulose bisphosphatase                     | <div></div> | xjf                                                     | 4-hydroxy-3-methylbut-2-enyl diphosphate reductase      | <div></div> |
| xic                                                     | Fructose-1,6-bisphosphatase 1                    | <div></div> | xjd                                                     | Geranylgeranyl pyrophosphate synthase 1                 | <div></div> |
| 2jl                                                     | Fructose-1,6-bisphosphatase 2                    | <div></div> | xaf                                                     | Geranylgeranyl pyrophosphate synthase 2                 | <div></div> |
| 5aa                                                     | Fructose-1,6-bisphosphatase 3                    | <div></div> | -                                                       | Isopentenyl diphosphate isomerase                       | <div></div> |
| xji                                                     | Transketolase                                    | <div></div> | 2oz                                                     | Phytoene synthase                                       | <div></div> |
| xkt                                                     | Ribose-5-phosphate isomerase                     | <div></div> | 2cb                                                     | Phytoene desaturase 1                                   | <div></div> |
| 2jj                                                     | D-ribulose-5-phosphate 3-epimerase               | <div></div> | xjy                                                     | Phytoene desaturase 2                                   | <div></div> |
| acq                                                     | Phosphoribulokinase 1                            | <div></div> | xhm                                                     | Zeta-carotene isomerase                                 | <div></div> |
| xfl                                                     | Phosphoribulokinase 2                            | <div></div> | 2kz                                                     | Zeta-carotene desaturase                                | <div></div> |
| b) Glycolysis/ gluconeogenesis                          |                                                  |             |                                                         |                                                         |             |
| 3bo                                                     | Phosphoglycerate mutase 1                        | <div></div> | 2dc                                                     | Beta-carotene isomerase                                 | <div></div> |
| 2je                                                     | Phosphoglycerate mutase 2                        | <div></div> | 2kx                                                     | Lycopene beta cyclase                                   | <div></div> |
| 2ko                                                     | Enolase                                          | <div></div> | xeq                                                     | Violaxanthin de-epoxidase                               | <div></div> |
| xlr                                                     | Pyruvate kinase                                  | <div></div> | xjg                                                     | Zeaxanthin epoxidase                                    | <div></div> |
| 2dd                                                     | Pyruvate dehydrogenase                           | <div></div> | 7. Iron-sulphur cluster biosynthesis                    |                                                         |             |
| xmt                                                     | Dihydrolipoamide dehydrogenase                   | <div></div> | -                                                       | SufB                                                    | <div></div> |
| xan                                                     | Dihydrolipoamide acetyltransferase               | <div></div> | -                                                       | SufC                                                    | <div></div> |
| 2hk                                                     | Pyruvate carboxylase                             | <div></div> | 2hx                                                     | FeS assembly protein SufD                               | <div></div> |
| xlj                                                     | Pyruvate phosphate dikinase                      | <div></div> | xjm                                                     | Cysteine desulphurase NFS1                              | <div></div> |
| 2is                                                     | Pyrophosphate-dependent phosphofructo-1-kinase   | <div></div> | xki                                                     | sulphite reductase (ferredoxin) 1                       | <div></div> |
| xnl                                                     | Phosphoglucosmutase                              | <div></div> | xra                                                     | sulphite reductase (ferredoxin) 2                       | <div></div> |
| xdv                                                     | Beta-glucan synthase                             | <div></div> | xlo                                                     | Fe-S cluster biosynthesis protein ISA1                  | <div></div> |
| 4ay                                                     | Glucan 1,3-beta-glucosidase                      | <div></div> | xgg                                                     | Mitochondrial Fe-S cluster biosynthesis protein ISA2    | <div></div> |
| xru                                                     | Hexose and triose phosphate transporter          | <div></div> | 2dy                                                     | NifU protein 1                                          | <div></div> |
|                                                         |                                                  |             | 2oq                                                     | NifU protein 2                                          | <div></div> |
| 8. Riboflavin biosynthesis                              |                                                  |             |                                                         |                                                         |             |
| 2oe                                                     | 4-dihydroxy-2-butanone 4-phosphate synthase      | <div></div> | 9. Glutamate/ glutamine/ aspartate/ lysine biosynthesis |                                                         |             |
| 2oe                                                     | GTP cyclohydrolase                               | <div></div> | a) Glutamine branch                                     |                                                         |             |
| 4hc                                                     | Riboflavin synthase                              | <div></div> | 2bx                                                     | Pyruvate transporter                                    | <div></div> |
| 9. Glutamate/ glutamine/ aspartate/ lysine biosynthesis |                                                  |             |                                                         |                                                         |             |
| a) Glutamine branch                                     |                                                  |             |                                                         |                                                         |             |
| 2ct                                                     | Bicarbonate transporter                          | <div></div> | 2ct                                                     | Bicarbonate transporter                                 | <div></div> |
| 2hk                                                     | Pyruvate carboxylase                             | <div></div> | 2hk                                                     | Pyruvate carboxylase                                    | <div></div> |
| 2mi                                                     | Aspartate aminotransferase                       | <div></div> | 2mi                                                     | Aspartate aminotransferase                              | <div></div> |
| 2jb                                                     | Glutamine synthetase                             | <div></div> | 2jb                                                     | Glutamine synthetase                                    | <div></div> |
| xso                                                     | Kynurenine aminotransferase                      | <div></div> | xso                                                     | Kynurenine aminotransferase                             | <div></div> |
| 2jk                                                     | Glutamate synthase                               | <div></div> | 2jk                                                     | Glutamate synthase                                      | <div></div> |
| b) Aspartate branch                                     |                                                  |             |                                                         |                                                         |             |
| xlk                                                     | Aspartate kinase                                 | <div></div> | 10. Aromatic amino acid biosynthesis                    |                                                         |             |
| 2cy                                                     | Aspartate-semialdehyde dehydrogenase 1           | <div></div> | a) Chorismate branch                                    |                                                         |             |
| xgf                                                     | Aspartate semialdehyde dehydrogenase 2           | <div></div> | xmk                                                     | DAHP synthetase                                         | <div></div> |
| 2br                                                     | Dihydropicolinate synthase                       | <div></div> | -                                                       | 3-dehydroquinate synthase                               | <div></div> |
| 4ba                                                     | Homoserine dehydrogenase                         | <div></div> | xjv                                                     | 3-dehydroquinate reductase/ Shikimate dehydroge         | <div></div> |
| xis                                                     | Dihydrodipicolinate reductase                    | <div></div> | -                                                       | Shikimate kinase                                        | <div></div> |
| xlw                                                     | Diaminopimelate aminotransferase                 | <div></div> | xiq                                                     | EPSP synthase                                           | <div></div> |
| xoi                                                     | Diaminopimelate epimerase                        | <div></div> | xsl                                                     | Chorismate synthase                                     | <div></div> |
| xkz                                                     | Diaminopimelate decarboxylase                    | <div></div> | b) Phenylalanine/Tyrosine branch                        |                                                         |             |
| 10. Aromatic amino acid biosynthesis                    |                                                  |             |                                                         |                                                         |             |
| a) Chorismate branch                                    |                                                  |             |                                                         |                                                         |             |
| xmk                                                     | DAHP synthetase                                  | <div></div> | 9af                                                     | Chorismate mutase                                       | <div></div> |
| -                                                       | 3-dehydroquinate synthase                        | <div></div> | 2mi                                                     | Aspartate aminotransferase                              | <div></div> |
| xjv                                                     | 3-dehydroquinate reductase/ Shikimate dehydroge  | <div></div> | xso                                                     | Kynurenine/ phenylpyruvate aminotransferase             | <div></div> |
| -                                                       | Shikimate kinase                                 | <div></div> | xsg                                                     | Prephenate dehydrogenase                                | <div></div> |
| xiq                                                     | EPSP synthase                                    | <div></div> | c) Tryptophan branch                                    |                                                         |             |
| xsl                                                     | Chorismate synthase                              | <div></div> | xhr                                                     | Anthraniolate synthase                                  | <div></div> |
| b) Phenylalanine/Tyrosine branch                        |                                                  |             |                                                         |                                                         |             |
| 9af                                                     | Chorismate mutase                                | <div></div> | xld                                                     | Anthraniolate phosphoribosyltransferase                 | <div></div> |
| 2mi                                                     | Aspartate aminotransferase                       | <div></div> | 2gg                                                     | Phosphoribosylanthranilate isomerase/ indole 3-gly      | <div></div> |
| xso                                                     | Kynurenine/ phenylpyruvate aminotransferase      | <div></div> | abs                                                     | Tryptophan synthase alpha                               | <div></div> |
| xsg                                                     | Prephenate dehydrogenase                         | <div></div> | xfu                                                     | Tryptophan synthase beta                                | <div></div> |
| 11. Branched chain amino acid biosynthesis              |                                                  |             |                                                         |                                                         |             |
| a) Valine/ Isoleucine branch                            |                                                  |             |                                                         |                                                         |             |
| -                                                       | Acetolactate synthase                            | <div></div> | 11. Branched chain amino acid biosynthesis              |                                                         |             |
| xmy                                                     | Keto-acid reductoisomerase                       | <div></div> | a) Valine/ Isoleucine branch                            |                                                         |             |
| xkg                                                     | Dihydroxy-acid dehydratase                       | <div></div> | -                                                       | Acetolactate synthase                                   | <div></div> |
| xiz                                                     | Branched-chain amino acid aminotransferase II    | <div></div> | xmy                                                     | Keto-acid reductoisomerase                              | <div></div> |
| b) Leucine branch                                       |                                                  |             |                                                         |                                                         |             |
| -                                                       | Isopropylmalate synthase                         | <div></div> | xkg                                                     | Dihydroxy-acid dehydratase                              | <div></div> |
| xmm                                                     | 3-isopropylmalate isomerase                      | <div></div> | xiz                                                     | Branched-chain amino acid aminotransferase II           | <div></div> |
| xkq                                                     | 3-isopropylmalate dehydrogenase                  | <div></div> | 12. Serine and cysteine biosynthesis                    |                                                         |             |
| xiz                                                     | Branched-chain amino acid aminotransferase II    | <div></div> | a) Serine branch                                        |                                                         |             |
| 12. Serine and cysteine biosynthesis                    |                                                  |             |                                                         |                                                         |             |
| a) Serine branch                                        |                                                  |             |                                                         |                                                         |             |
| xhx                                                     | Serine hydroxymethyltransferase                  | <div></div> | b) Cysteine branch                                      |                                                         |             |
| xly                                                     | ATP sulphurylase (sulphate adenyllyltransferase) | <div></div> | xly                                                     | ATP sulphurylase (sulphate adenyllyltransferase)        | <div></div> |
| -                                                       | Adenosine sulphate kinase                        | <div></div> | -                                                       | Adenosine sulphate kinase                               | <div></div> |
| xiv                                                     | Phosphoadenosine phosphosulphate reductase 1/    | <div></div> | xiv                                                     | Phosphoadenosine phosphosulphate reductase 1/           | <div></div> |
| xkd                                                     | Phosphoadenosine phosphosulphate reductase 2     | <div></div> | xkd                                                     | Phosphoadenosine phosphosulphate reductase 2            | <div></div> |
| xki                                                     | sulphite reductase (ferredoxin) 1                | <div></div> | xki                                                     | sulphite reductase (ferredoxin) 1                       | <div></div> |
| xra                                                     | sulphite reductase (ferredoxin) 2                | <div></div> | xra                                                     | sulphite reductase (ferredoxin) 2                       | <div></div> |
| xct                                                     | Cysteine synthase                                | <div></div> | xct                                                     | Cysteine synthase                                       | <div></div> |
| xgx                                                     | Serine O-acetyltransferase                       | <div></div> | xgx                                                     | Serine O-acetyltransferase                              | <div></div> |
| 13. Aminoacyl tRNA synthetases                          |                                                  |             |                                                         |                                                         |             |
| xhe                                                     | Alanyl-tRNA synthetase                           | <div></div> | 13. Aminoacyl tRNA synthetases                          |                                                         |             |
| 2mg                                                     | CysteinyI-tRNA synthetase 1                      | <div></div> | a) Serine branch                                        |                                                         |             |
| 2cw                                                     | CysteinyI-tRNA synthetase 2                      | <div></div> | b) Cysteine branch                                      |                                                         |             |
| 2np                                                     | Aspartyl-tRNA synthetase                         | <div></div> | xhe                                                     | Alanyl-tRNA synthetase                                  | <div></div> |
| 2ol                                                     | Glutamyl-tRNA synthetase                         | <div></div> | 2mg                                                     | CysteinyI-tRNA synthetase 1                             | <div></div> |
| 2mr                                                     | Phenylalanyl-tRNA synthetase 1                   | <div></div> | 2cw                                                     | CysteinyI-tRNA synthetase 2                             | <div></div> |
| 2lx                                                     | Phenylalanyl-tRNA synthetase 2                   | <div></div> | 2np                                                     | Aspartyl-tRNA synthetase                                | <div></div> |
| 2ja                                                     | Glycyl-tRNA synthetase                           | <div></div> | 2ol                                                     | Glutamyl-tRNA synthetase                                | <div></div> |
| xmg                                                     | Histidyl-tRNA synthetase                         | <div></div> | 2mr                                                     | Phenylalanyl-tRNA synthetase 1                          | <div></div> |
| 2qe                                                     | Isoleucyl-tRNA synthetase                        | <div></div> | 2lx                                                     | Phenylalanyl-tRNA synthetase 2                          | <div></div> |
| 9aa                                                     | Lysyl-tRNA synthetase                            | <div></div> | 2ja                                                     | Glycyl-tRNA synthetase                                  | <div></div> |
| 2kq                                                     | Leucyl-tRNA synthetase                           | <div></div> | xmg                                                     | Histidyl-tRNA synthetase                                | <div></div> |
| xdl                                                     | Methionyl-tRNA synthetase                        | <div></div> | 2qe                                                     | Isoleucyl-tRNA synthetase                               | <div></div> |
| xqu                                                     | Asparaginyl-tRNA synthetase                      | <div></div> | 9aa                                                     | Lysyl-tRNA synthetase                                   | <div></div> |
| xsa                                                     | Prolyl-tRNA synthetase                           | <div></div> | 2kq                                                     | Leucyl-tRNA synthetase                                  | <div></div> |
| xho                                                     | Glutamyl-tRNA synthetase                         | <div></div> | xdl                                                     | Methionyl-tRNA synthetase                               | <div></div> |
| 9ac                                                     | Arginyl-tRNA synthetase                          | <div></div> | xqu                                                     | Asparaginyl-tRNA synthetase                             | <div></div> |
| xhf                                                     | Seryl-tRNA synthetase                            | <div></div> | xsa                                                     | Prolyl-tRNA synthetase                                  | <div></div> |
| xiu                                                     | Threonyl-tRNA synthetase                         | <div></div> | xho                                                     | Glutamyl-tRNA synthetase                                | <div></div> |
| xky                                                     | Valyl-tRNA synthetase                            | <div></div> | 9ac                                                     | Arginyl-tRNA synthetase                                 | <div></div> |
| xhg                                                     | Tryptophanyl-tRNA synthetase                     | <div></div> | xhf                                                     | Seryl-tRNA synthetase                                   | <div></div> |
| xfs                                                     | Tyrosyl-tRNA synthetase                          | <div></div> | xiu                                                     | Threonyl-tRNA synthetase                                | <div></div> |
| 14. Nucleotide synthesis and import                     |                                                  |             |                                                         |                                                         |             |
| 2cs                                                     | Adenylate kinase                                 | <div></div> | 14. Nucleotide synthesis and import                     |                                                         |             |
| xnf                                                     | Guanylate kinase                                 | <div></div> | a) Serine branch                                        |                                                         |             |
| 2ow                                                     | UMP-CMP kinase                                   | <div></div> | b) Cysteine branch                                      |                                                         |             |
| 2hu                                                     | Nucleotide triposphate transporter 1             | <div></div> | xnf                                                     | Guanylate kinase                                        | <div></div> |
| 15. Ribosome                                            |                                                  |             |                                                         |                                                         |             |
| rps2-14, rps16-20                                       |                                                  |             |                                                         |                                                         |             |
| rpl1-6, rpl11-16, rpl18-24, rpl27, rpl29, rpl31-36      |                                                  |             |                                                         |                                                         |             |
| xjb                                                     | rps1A                                            | <div></div> | a) Serine branch                                        |                                                         |             |
| xih                                                     | rps1B                                            | <div></div> | b) Cysteine branch                                      |                                                         |             |
| -                                                       | rps15                                            | <div></div> | xjb                                                     | rps1A                                                   | <div></div> |
| 2mt                                                     | rpl9                                             | <div></div> | xih                                                     | rps1B                                                   | <div></div> |
| xix                                                     | rpl10                                            | <div></div> | -                                                       | rps15                                                   | <div></div> |
| xhv                                                     | rpl17                                            | <div></div> | 2mt                                                     | rpl9                                                    | <div></div> |
| xju                                                     | rpl28                                            | <div></div> | xix                                                     | rpl10                                                   | <div></div> |
| xmh                                                     | rps30A                                           | <div></div> | xhv                                                     | rpl17                                                   | <div></div> |
| xid                                                     | rps21                                            | <div></div> | xju                                                     | rpl28                                                   | <div></div> |
| 16. Translation initiation                              |                                                  |             |                                                         |                                                         |             |
| xjt                                                     | Translation initiation factor 1                  | <div></div> | 16. Translation initiation                              |                                                         |             |
| xjc                                                     | Translation initiation factor 2                  | <div></div> | a) Serine branch                                        |                                                         |             |
| 4ac                                                     | Translation initiation factor 3                  | <div></div> | b) Cysteine branch                                      |                                                         |             |
| -                                                       | Translation elongation factor EF-Tu              | <div></div> | xjt                                                     | Translation initiation factor 1                         | <div></div> |
| -                                                       | Translation elongation factor EF-Ts              | <div></div> | xjc                                                     | Translation initiation factor 2                         | <div></div> |
| xqr                                                     | Translation elongation factor P                  | <div></div> | 4ac                                                     | Translation initiation factor 3                         | <div></div> |
| xjl                                                     | Translation elongation factor G                  | <div></div> | -                                                       | Translation elongation factor EF-Tu                     | <div></div> |
| 2qq                                                     | Ribosome release factor                          | <div></div> | -                                                       | Translation elongation factor EF-Ts                     | <div></div> |
| xqf                                                     | Ribosome recycling factor                        | <div></div> | xqr                                                     | Translation elongation factor P                         | <div></div> |
