# Supplementary material for: Chimeric origins of ochrophytes and haptophytes revealed through an ancient plastid proteome
Source: eLife journal article supplement (doi:10.7554/elife.23717), 2017-05-12
Supplement: supp [file elife_poa_e23717_Figure_5_Supplement_2.pdf › elife_poa_e23717_Figure_5_Supplement_2.pdf]

**Fig. 5- figure supplement 2. Core plastid metabolism proteins not identified within the ancestral HPPG dataset.**

| Enzyme                                              | Pathway                   | Distribution              | Probable explanation                                                                       | References                              |
|-----------------------------------------------------|---------------------------|---------------------------|--------------------------------------------------------------------------------------------|-----------------------------------------|
| Sedoheptulose-bis-phosphatase                       | CBB cycle                 | Multiple isoforms         | Functionally conserved, but with different LGT events in different ochrophyte lineages     | Fig. supplement 3                       |
| Transaldolase                                       | CBB cycle                 | Hypogyristera and diatoms | Functionally complemented by sedoheptulose-bis-phosphatase/ fructose-bisphosphate aldolase | Kroth et al., 2008                      |
| Isopropylmalate dehydrogenase                       | Leucine biosynthesis      | Multiple isoforms         | Functionally conserved, but with different LGT events in different ochrophyte lineages     | Fig. supplement 4                       |
| 3-dehydroquinate synthase                           | Shikimate biosynthesis    | Multiple isoforms         | Functionally conserved, but with different LGT events in different ochrophyte lineages     | Fig. supplement 5                       |
| Shikimate kinase                                    | Shikimate biosynthesis    | Multiple isoforms         | Functionally conserved, but with different LGT events in different ochrophyte lineages     | Fig. supplement 6                       |
| APS kinase                                          | Fe-S cluster biosynthesis | Not found                 | Functionally dispensible; may be complemented by PAPS reductase                            | Gutierrez-Marcos et al. 1996            |
| Magnesium protoporphyrin IX methylmonoester cyclase | Chlorophyll biosynthesis  | Not found                 | Not known to be essential for chlorophyll metabolism outside of green lineage              | Tanaka and Tanaka 2007                  |
| Isopentenyl diphosphate isomerase                   | Carotenoid biosynthesis   | Not found                 | Dispensible for isoprenoid metabolism                                                      | Ershov et al. 2000; Rohdich et al. 2002 |
| rps15                                               | Ribosomal small subunit   | Not found                 | Not known outside of green lineage                                                         | Green 2011                              |
