# Supplementary material for: Chimeric origins of ochrophytes and haptophytes revealed through an ancient plastid proteome
Source: eLife journal article supplement (doi:10.7554/elife.23717), 2017-05-12
Supplement: supp [file elife_poa_e23717_Figure_5_Supplement_3.pdf › elife_poa_e23717_Figure_5_Supplement_3.pdf]

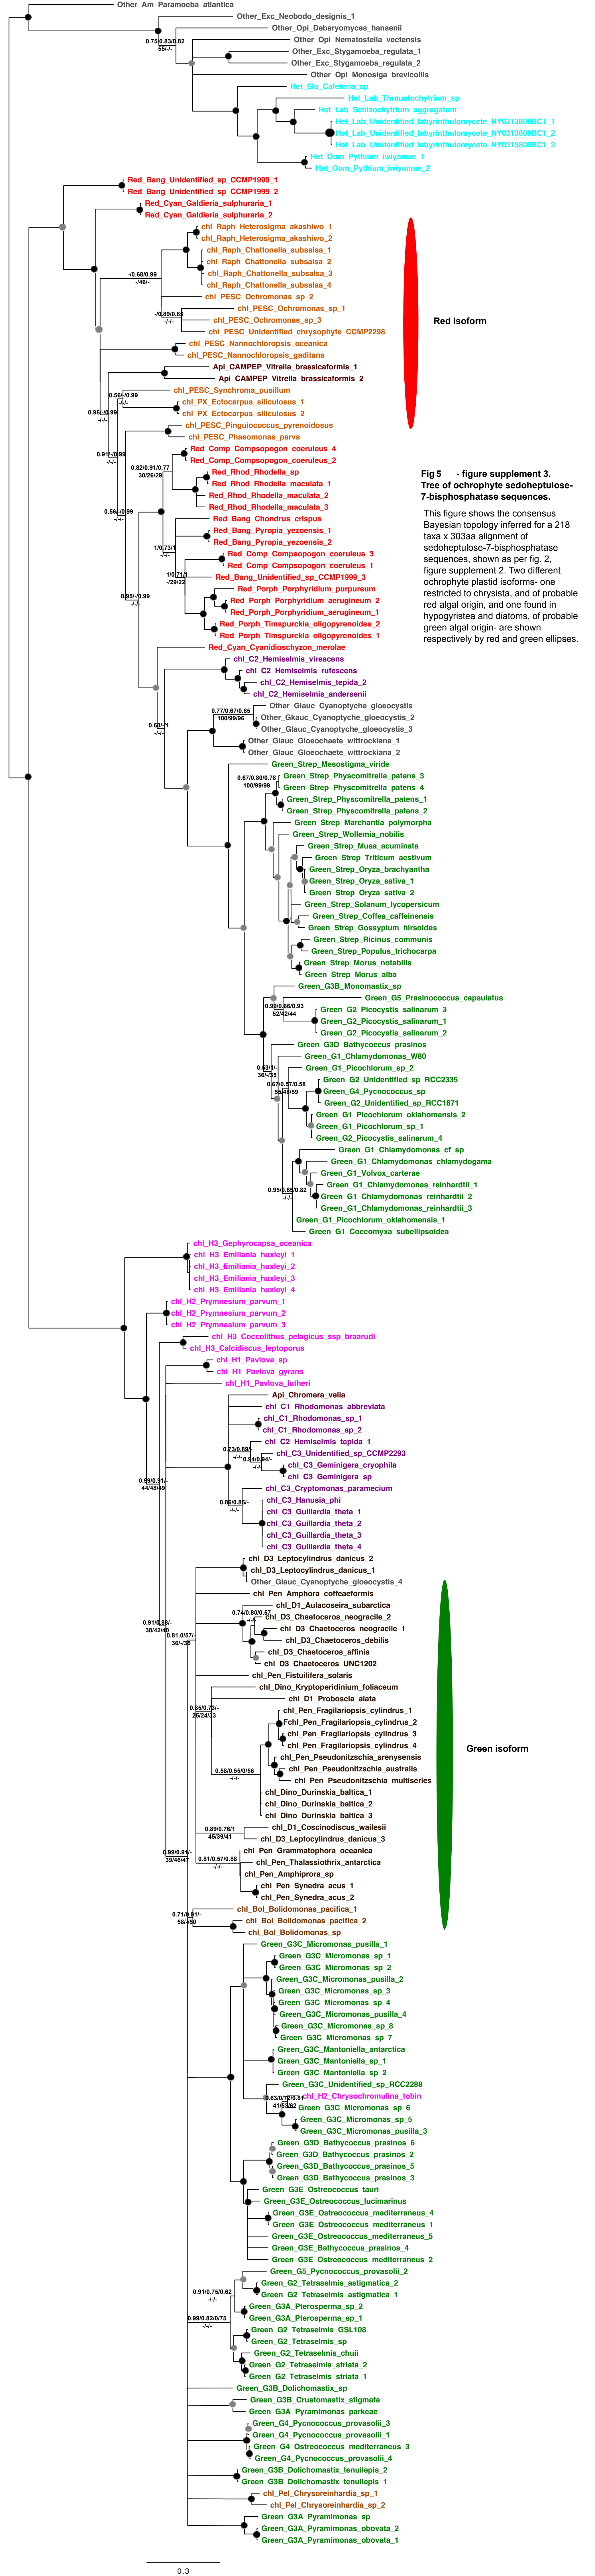

**Fig 5 - figure supplement 3.**  
**Tree of ochrophyte sedoheptulose-7-bisphosphatase sequences.**

This figure shows the consensus Bayesian topology inferred for a 218 taxa x 303aa alignment of sedoheptulose-7-bisphosphatase sequences, shown as per fig. 2, figure supplement 2. Two different ochrophyte plastid isoforms- one restricted to chryista, and of probable red algal origin, and one found in hypogrystea and diatoms, of probable green algal origin- are shown respectively by red and green ellipses.
