# Supplementary material for: Chimeric origins of ochrophytes and haptophytes revealed through an ancient plastid proteome
Source: eLife journal article supplement (doi:10.7554/elife.23717), 2017-05-12

**Fig. 5- figure supplement 7. KOG classes associated with different categories of HPPGs.** These pie charts profile the distribution of different KOG classes across (i) all HPPGs except for those with general function predictions only, or without any clear KOG function, (ii) the same, but restricted to ancestral HPPGs and (iii) the same, for ancestral HPPGs of unambiguous red, green, prokaryotic and aplastidic stramenopile origin as identified by combined BLAST tophit and single-gene tree analysis. KOG classes that occur at elevated frequency in the ancestral HPPG dataset compared to the complete HPPG dataset, and one KOG class enriched in the prokaryotic HPPG dataset compared to the ancestral HPPG dataset (chi-squared test,  $P < 0.05$ ) are labelled with horizontal arrows.

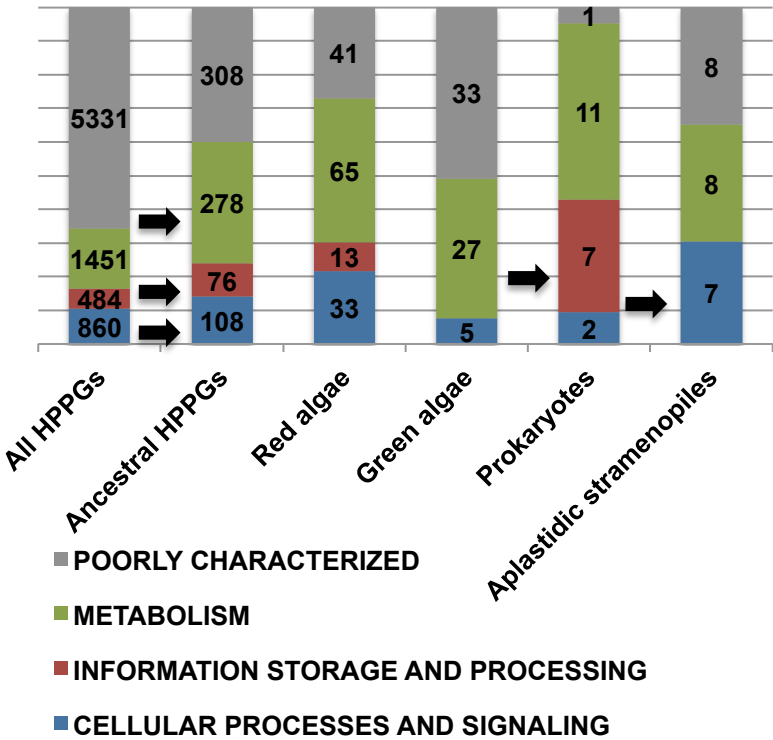

Supplement: supp [file elife_poa_e23717_Figure_5_Supplement_7.pdf › elife_poa_e23717_Figure_5_Supplement_7.pdf]
