# Supplementary material for: Chimeric origins of ochrophytes and haptophytes revealed through an ancient plastid proteome
Source: eLife journal article supplement (doi:10.7554/elife.23717), 2017-05-12
Supplement: supp [file elife_poa_e23717_Figure_5_Supplement_9.pdf › elife_poa_e23717_Figure_5_Supplement_9.pdf]

**Fig. 5- figure supplement 9. Coregulation of genes incorporated into HPPGs of different origin in the model diatom *Thalassiosira pseudonana*.** Boxplots (**Panel A**) and P value statistics (**Panel B**) are shown as per Fig. 5- figure supplement 8. Only two of the correlation value ANOVA tests (comparison of red-red and red-host correlations, and prokaryotic-prokaryotic and prokaryotic-host correlations, shaded in green) reveal a significantly higher correlation coefficient between pairs of genes encoding members of HPPG of the same evolutionary origin than pairs of genes encoding members of HPPGs with different evolutionary origins. These differences most probably reflect the extremely weak correlation coefficients associated with genes encoding HPPGs of host origin to all other genes considered (compare “Host” category on boxplots **i**, **ii** and **iii** to all other categories); however, detailed comparison of the correlation values between genes encoding ancestral HPPGs of host origin and genes encoding ancestral HPPGs of different evolutionary origin (**Panel A**, boxplot **iv**; **Panel B**, bottom row) reveals no specific difference in the pairwise correlation values observed between genes encoding ancestral HPPGs of host origin, and genes encoding ancestral HPPGs of all other origins within the dataset.

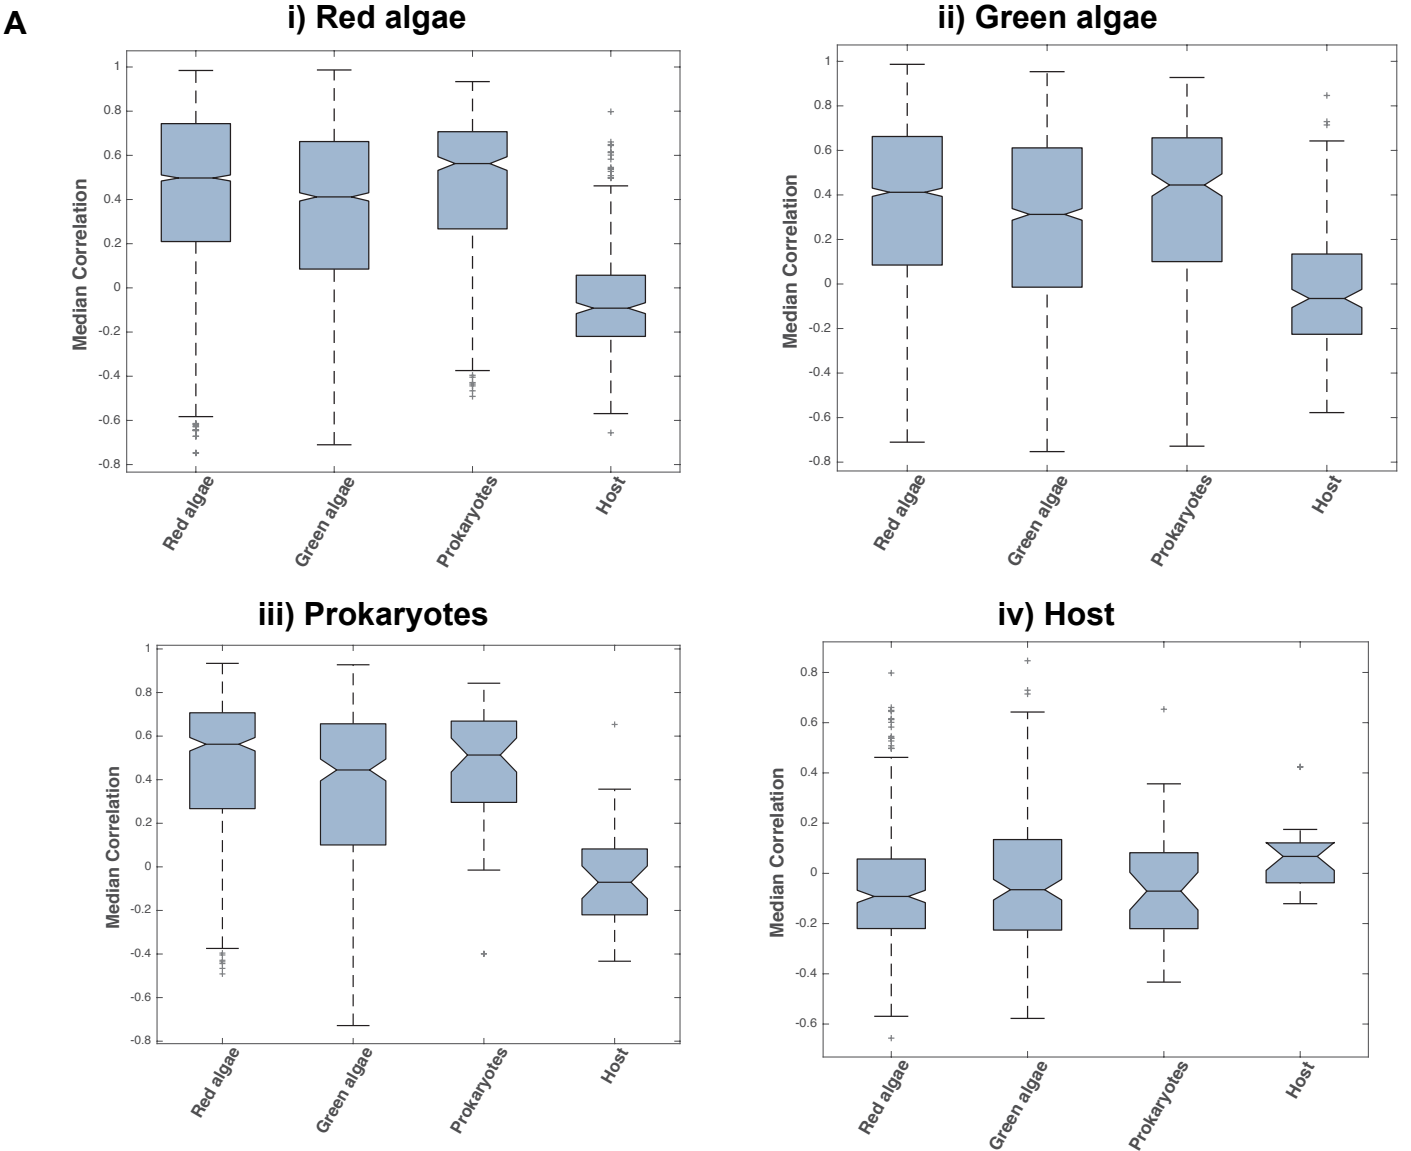

**B**

|             | Red    | Green | Prokaryotic | Host |
|-------------|--------|-------|-------------|------|
| Red         |        |       |             |      |
| Green       | -0.376 |       |             |      |
| Prokaryotic | 0.279  | 0.473 |             |      |
| Host        | -0.951 | 0.478 | 0.323       |      |
