# Supplementary material for: Chimeric origins of ochrophytes and haptophytes revealed through an ancient plastid proteome
Source: eLife journal article supplement (doi:10.7554/elife.23717), 2017-05-12

**Fig. 6- figure supplement 1. Alignments of an ochrophyte-specific riboflavin biosynthesis fusion protein. Panel A** shows alignments of the full length (i) and cyclohydrolase domain only (ii) of a plastid-targeted GTP cyclohydrolase II/ 3,4-dihydroxy-2-butanone 4-phosphate synthase protein conserved across the ochrophytes. Coloured bars adjacent to each sequence correspond to the phylogenetic identity of the sequence. The cyclohydrolase domain of the ochrophyte protein is positioned in the N-terminal region, and the synthase domain in the C-terminal region. Three uniquely shared residues at the N-terminus of the cyclohydrolase domain confirm that it has been inherited from the aplastidic stramenopile ancestor of the ochrophytes.

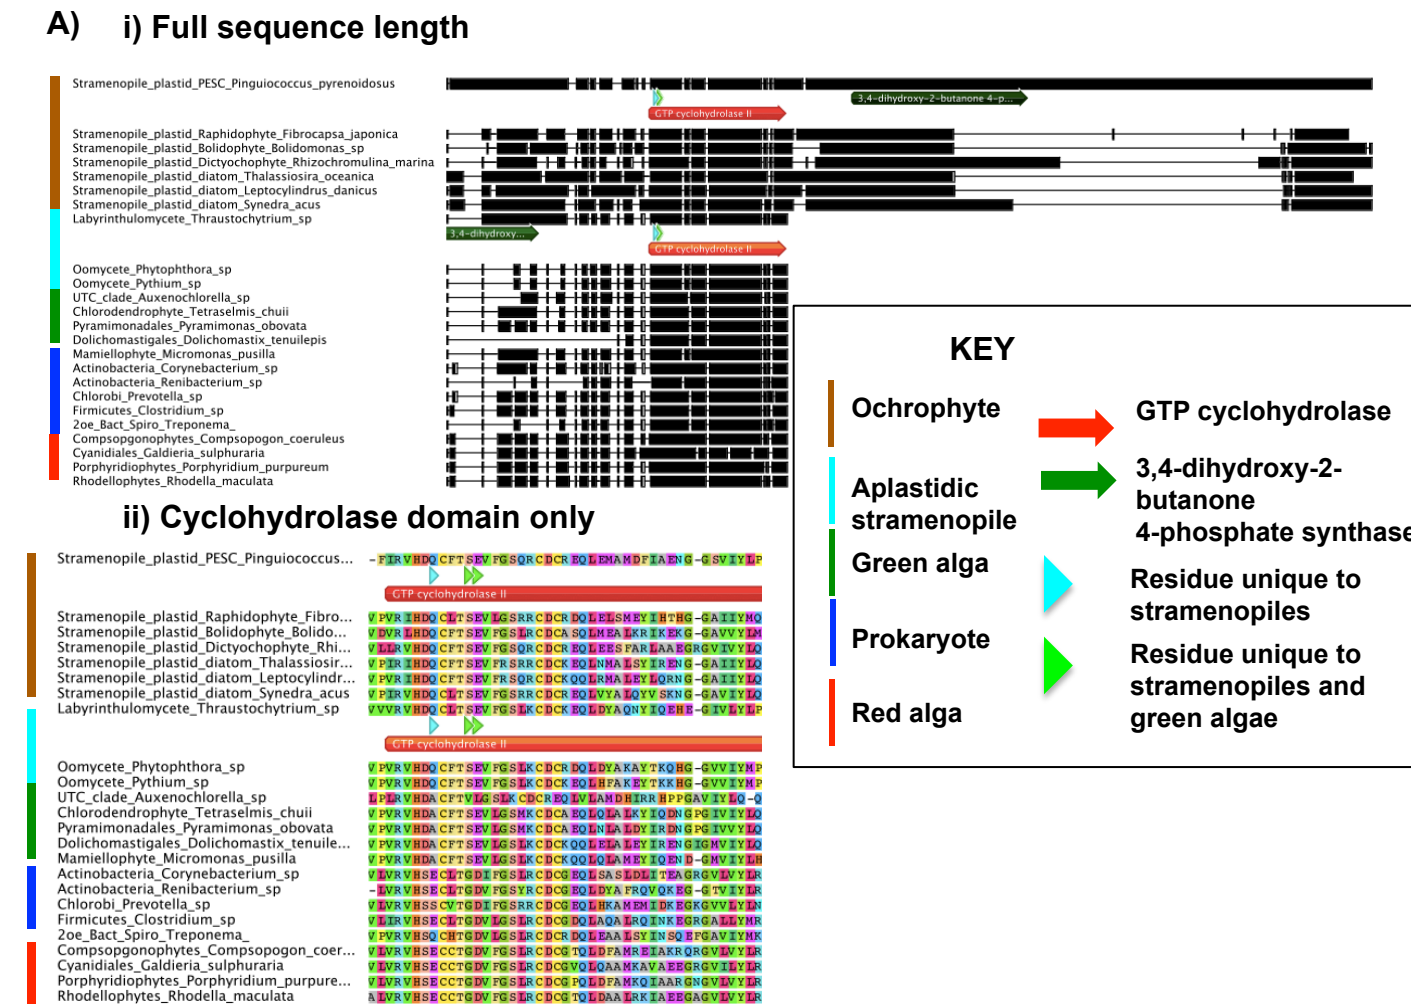

Supplement: supp [file elife_poa_e23717_Figure_6_Supplement_1.pdf › elife_poa_e23717_Figure_6_Supplement_1.pdf]
