# Supplementary material for: Chimeric origins of ochrophytes and haptophytes revealed through an ancient plastid proteome
Source: eLife journal article supplement (doi:10.7554/elife.23717), 2017-05-12

**Fig. 6- figure supplement 2. Origins of ochrophyte plastid 3,4-dihydroxy-2-butanone 4-phosphate synthase.** This figure shows the consensus Bayesian topology inferred for a 22 taxa x 206 aa alignment of 3,4-dihydroxy-2-butanone 4-phosphate synthase domains from different lineages, inferred using Jones and WAG matrices, and shown as per fig. 2, figure supplement 2. The ochrophyte plastid isoforms branch with red algal and actinobacterial sequences.

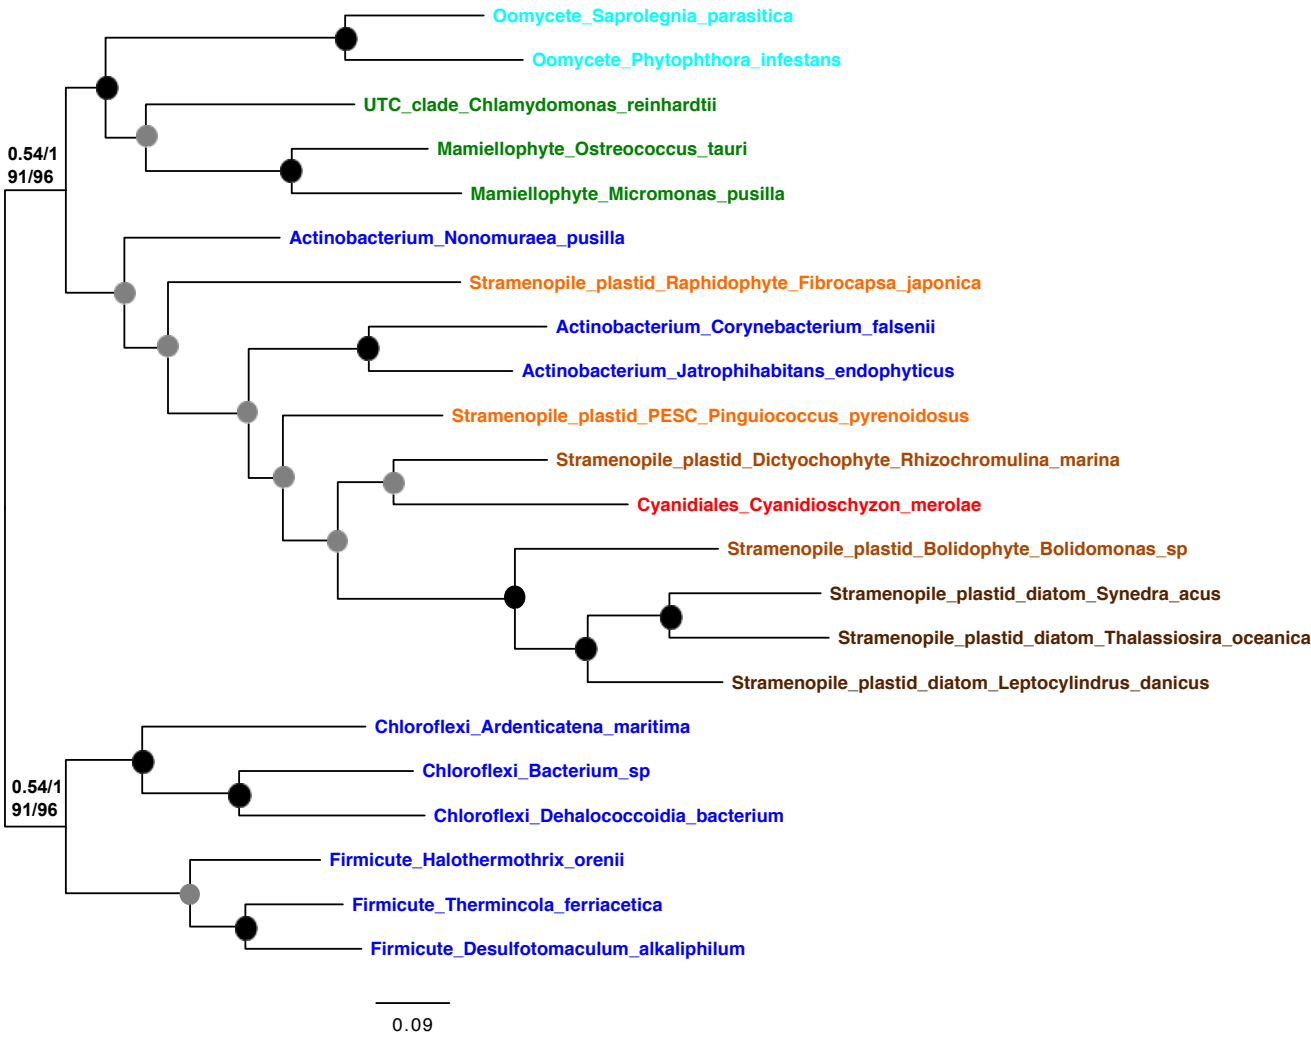

Supplement: supp [file elife_poa_e23717_Figure_6_Supplement_2.pdf › elife_poa_e23717_Figure_6_Supplement_2.pdf]
