# Supplementary material for: Chimeric origins of ochrophytes and haptophytes revealed through an ancient plastid proteome
Source: eLife journal article supplement (doi:10.7554/elife.23717), 2017-05-12

**Fig. 6- figure supplement 3. An ochrophyte-specific Tic20 fusion protein.** This figure shows alignments of the full length (i) and conserved region only (ii) of plastid Tic20 sequences, displayed as per figure supplement 9.

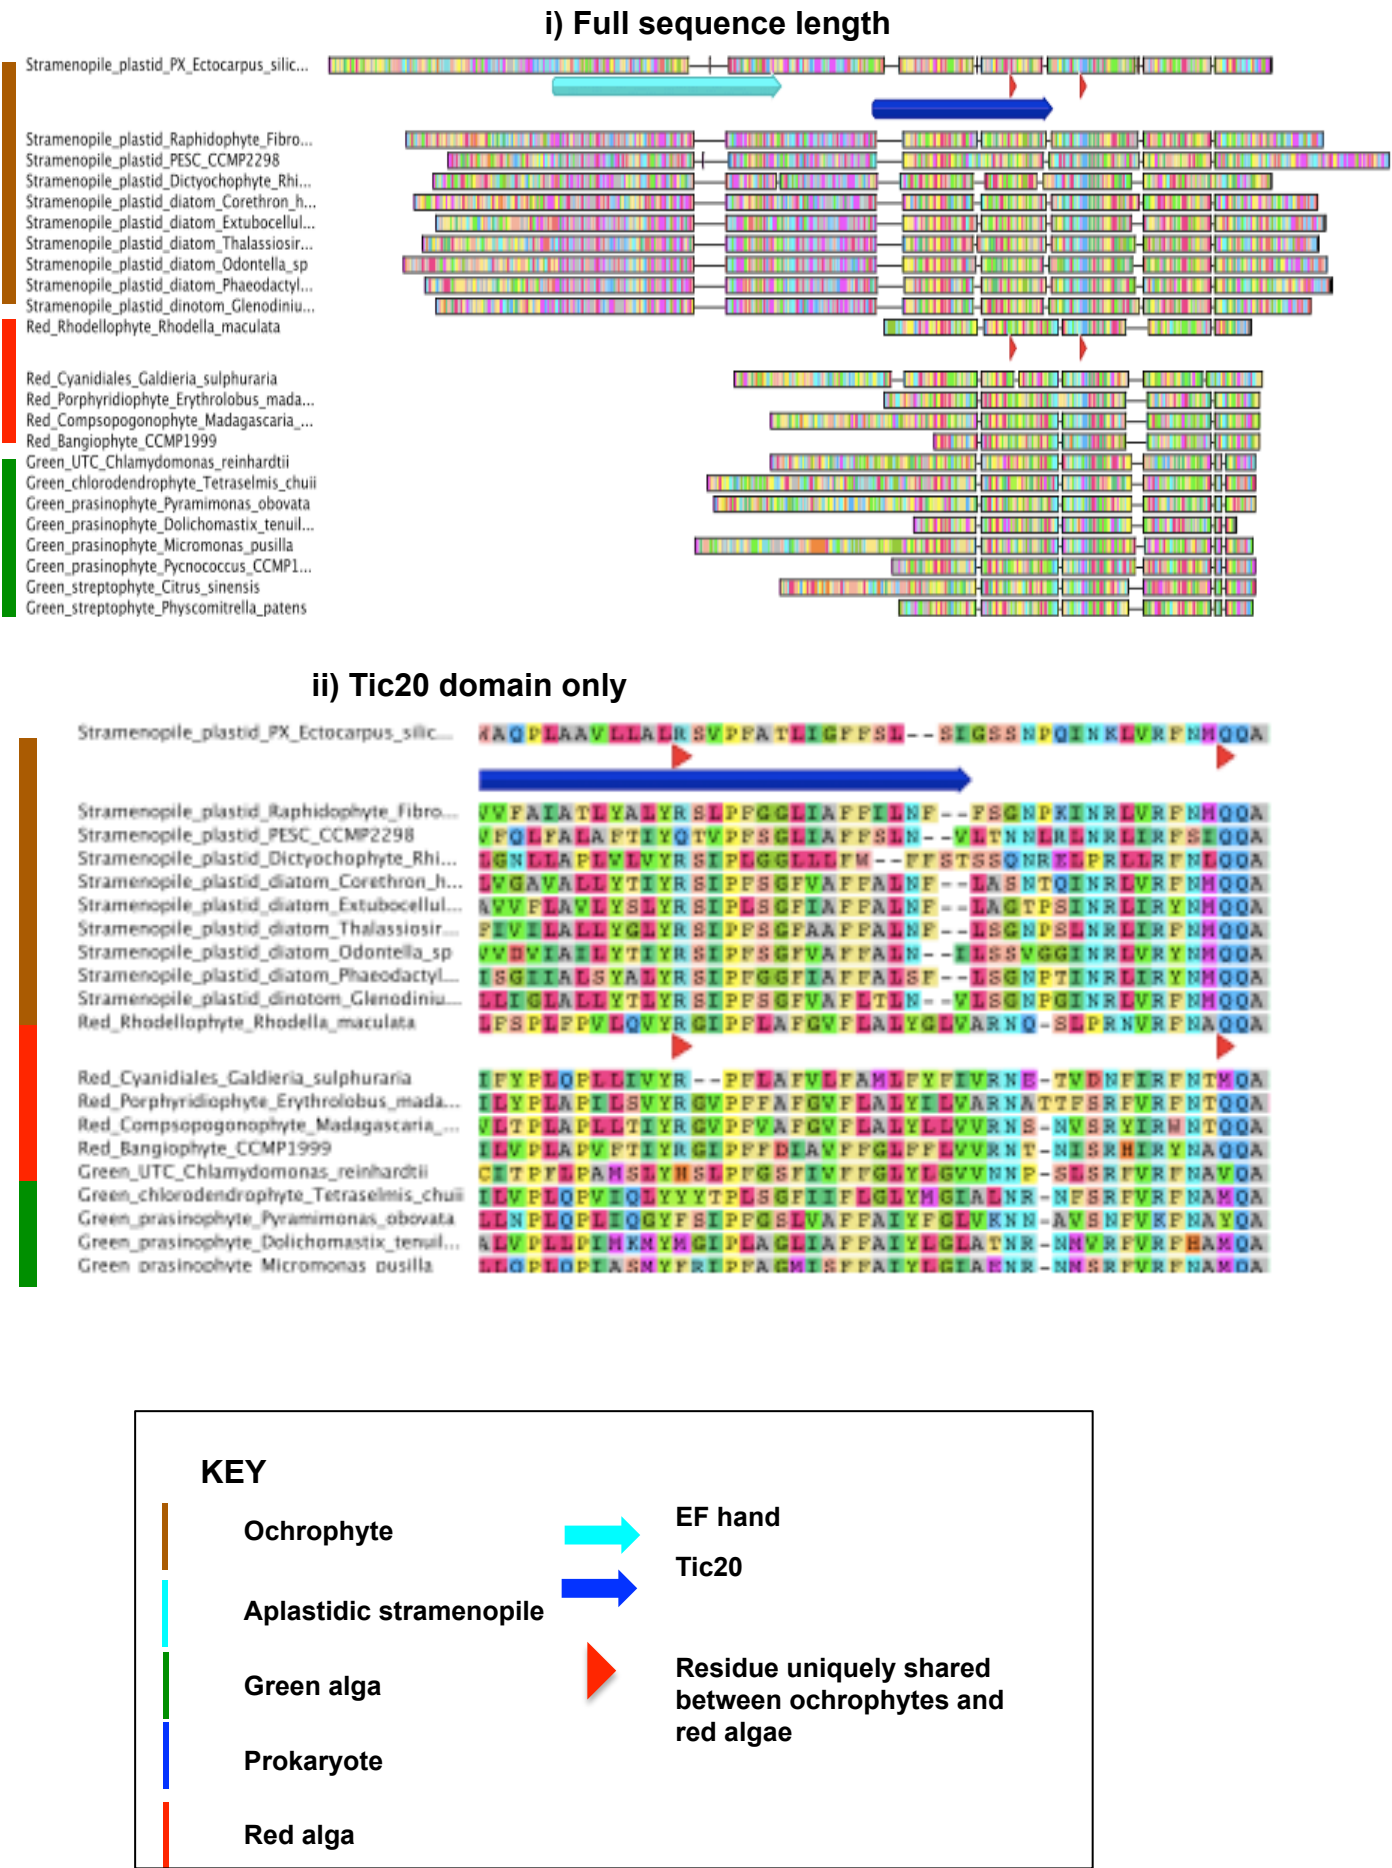

Supplement: supp [file elife_poa_e23717_Figure_6_Supplement_3.pdf › elife_poa_e23717_Figure_6_Supplement_3.pdf]
