# Supplementary material for: Chimeric origins of ochrophytes and haptophytes revealed through an ancient plastid proteome
Source: eLife journal article supplement (doi:10.7554/elife.23717), 2017-05-12

**Fig. 7- figure supplement 1. Experimental verification of additional ochrophyte dual-targeted proteins.** **Panel A** shows Mitotracker-orange stained *Phaeodactylum tricornutum* lines expressing four additional dual-targeted proteins (glycyl-, leucyl-, and methionyl-tRNA synthetases, and a predicted mitochondrial GroES-type chaperone) from *Phaeodactylum tricornutum*, and a dual-targeted histidyl-tRNA synthetase from *Glenodinium foliaceum*. **Panel B** shows control images that confirm an absence of crosstalk between GFP and mitotracker: wild-type *Phaeodactylum* cells stained with mitotracker, and cells expressing the *Glenodinium* histidyl-tRNA synthetase–GFP fusion construct and visualised with the mitotracker laser and channel in the absence of mitotracker stain.

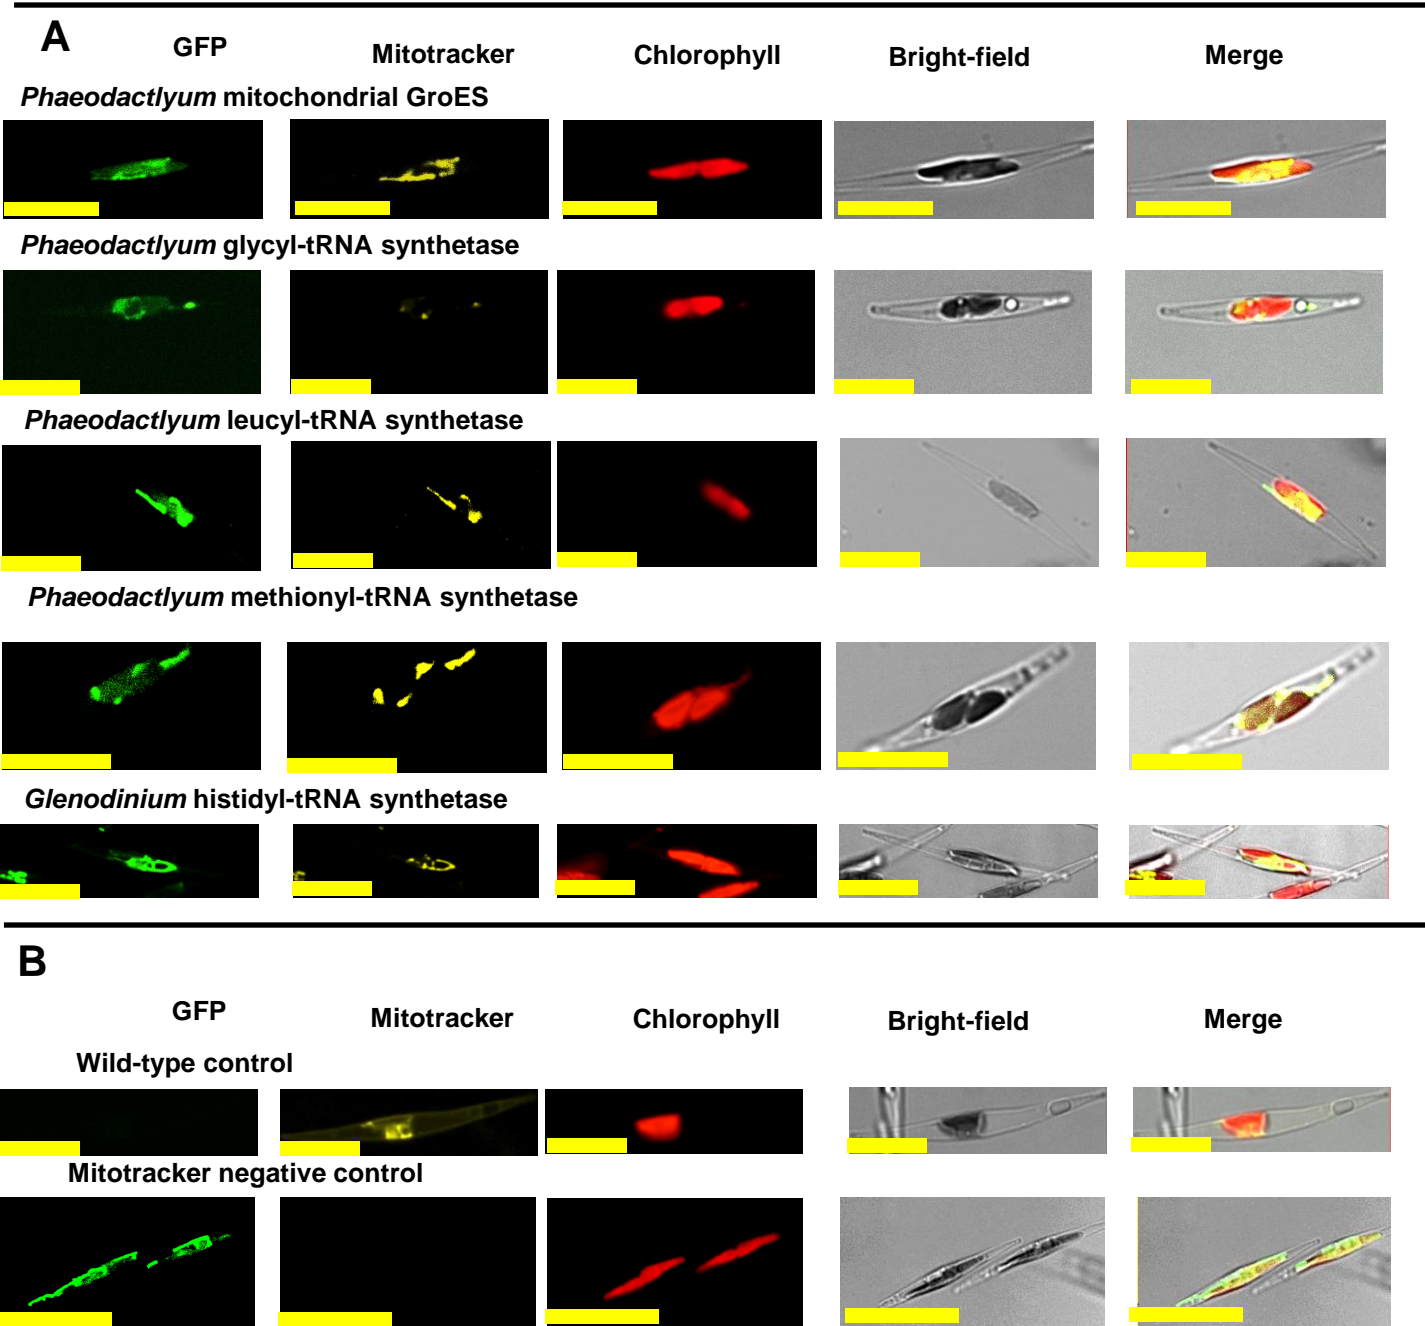

Supplement: supp [file elife_poa_e23717_Figure_7_Supplement_1.pdf › elife_poa_e23717_Figure_7_Supplement_1.pdf]
