# Supplementary material for: Chimeric origins of ochrophytes and haptophytes revealed through an ancient plastid proteome
Source: eLife journal article supplement (doi:10.7554/elife.23717), 2017-05-12

**Fig. 7- figure supplement 2. Comparison of different in silico targeting prediction programmes for the identification of dual-targeted ochrophyte proteins.** **Panel A** shows Mitofates scores for ochrophyte proteins verified experimentally to be dual targeted in this and a previous study<sup>9</sup>. **Panel B** shows Mitofates scores for all ochrophyte proteins for which a subcellular localisation has been identified in previous studies. The red lines in each graph show the Mitofates default cutoff (0.385) and the green lines indicate our chosen cutoff (0.35). **Panel C** compares different in silico targeting prediction algorithms with respect to predicted mitochondrial localization by experimentally validated localization. Mitofates strikes the best balance between high true positives and low false positives.

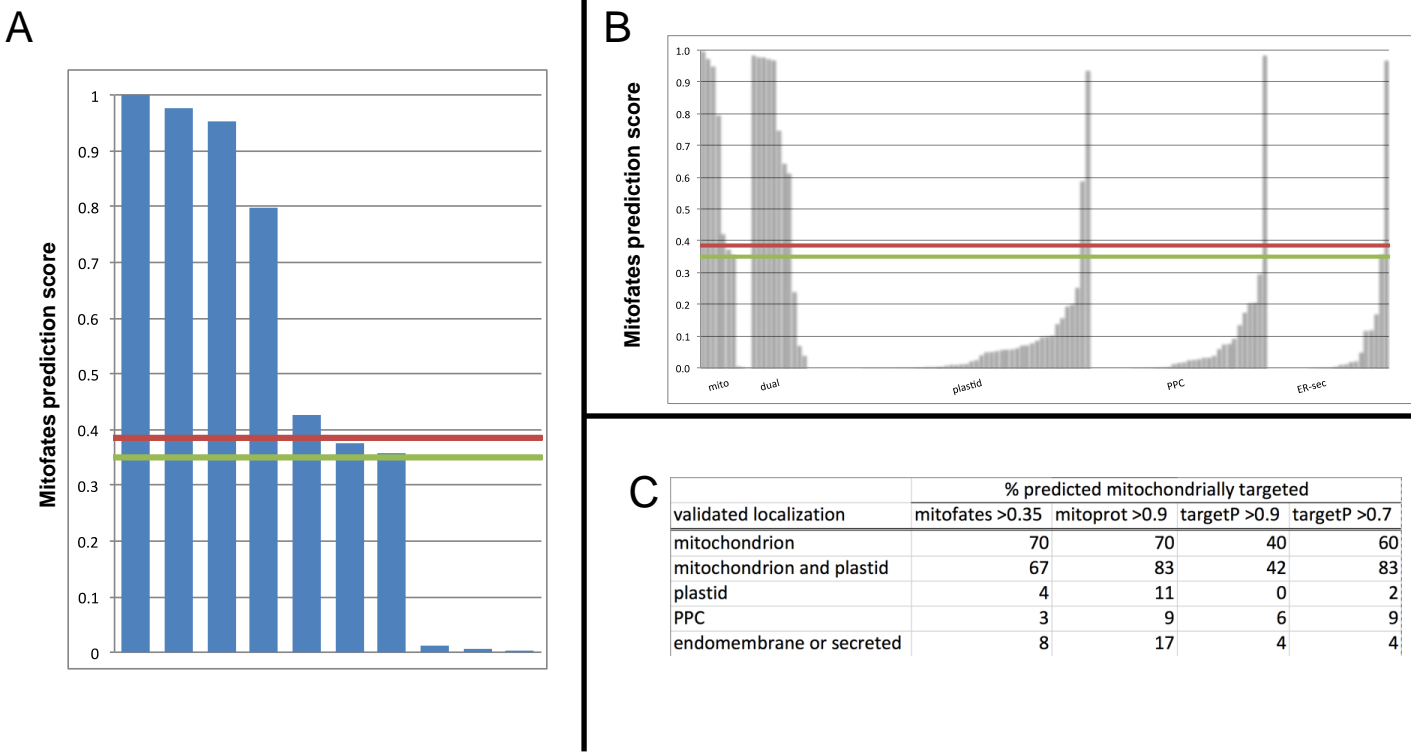

Supplement: supp [file elife_poa_e23717_Figure_7_Supplement_2.pdf › elife_poa_e23717_Figure_7_Supplement_2.pdf]
