# Supplementary material for: Chimeric origins of ochrophytes and haptophytes revealed through an ancient plastid proteome
Source: eLife journal article supplement (doi:10.7554/elife.23717), 2017-05-12
Supplement: supp [file elife_poa_e23717_Figure_8_Supplement_2.pdf › elife_poa_e23717_Figure_8_Supplement_2.pdf]

**Fig.8- figure supplement 2. Heatmaps of nearest sister-groups to haptophytes in ancestral ochrophyte HPPG trees.** This figure shows the specific ochrophyte lineages implicated in the origin of haptophyte plastid-targeted proteins, as inferred from the nearest ochrophyte sister-groups to haptophytes in trees of 242 haptophyte proteins of probable ochrophyte origin from combined BLAST top hit and single-gene tree analysis. At the top a schematic tree diagram of the ochrophytes is shown as per fig. 1, with six major nodes in ochrophyte evolution labelled with coloured boxes. The heatmap below shows the specific distribution of sister-groups in each tree, shown as per figure 4- figure supplement 2.

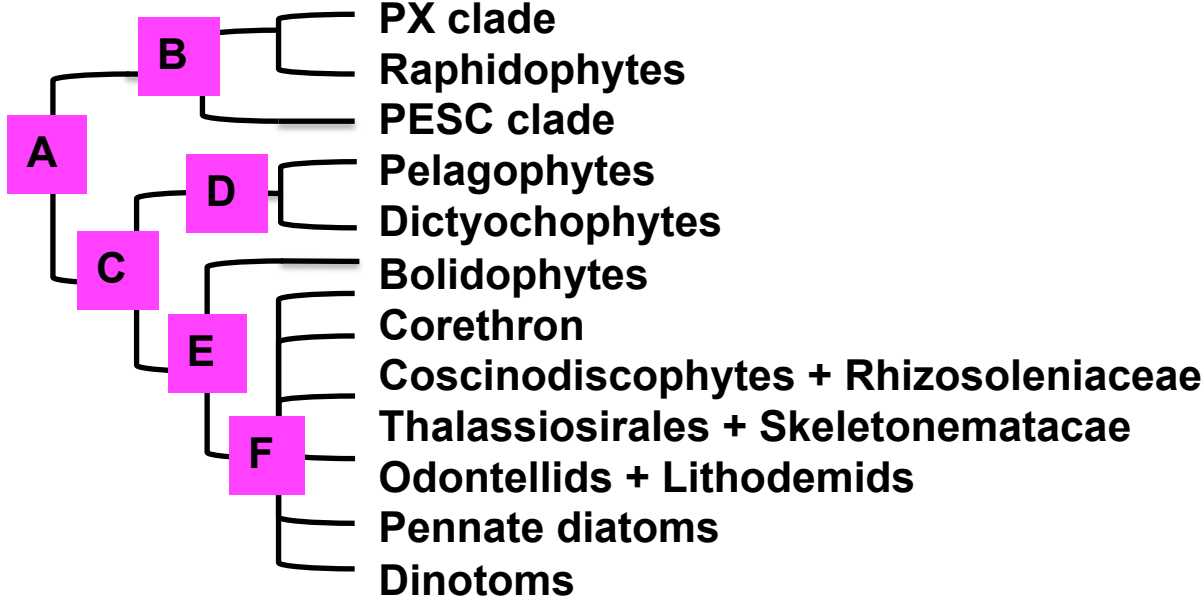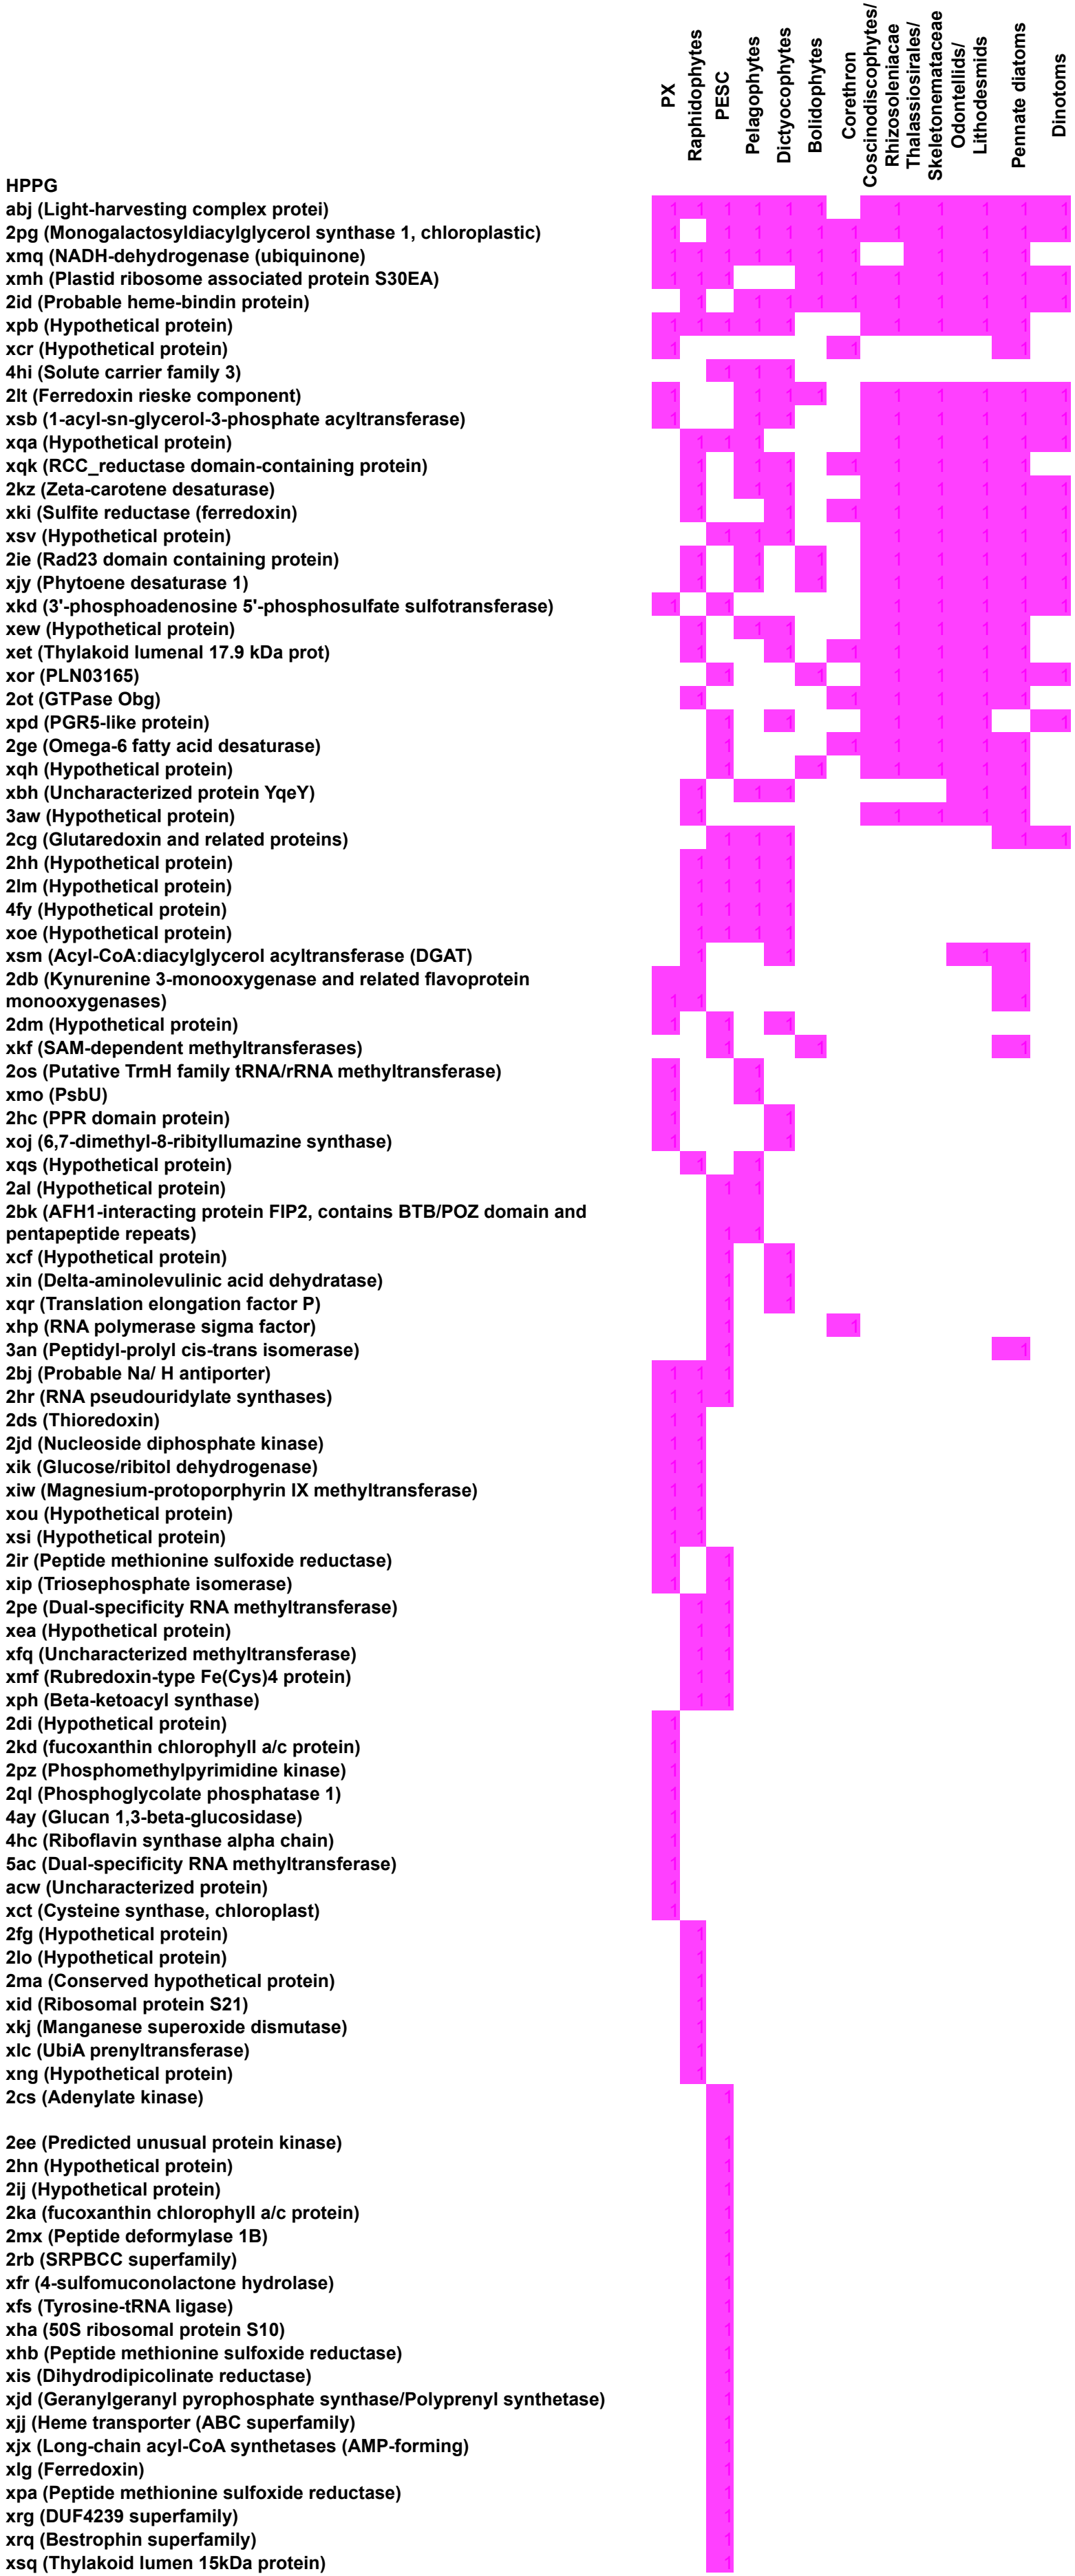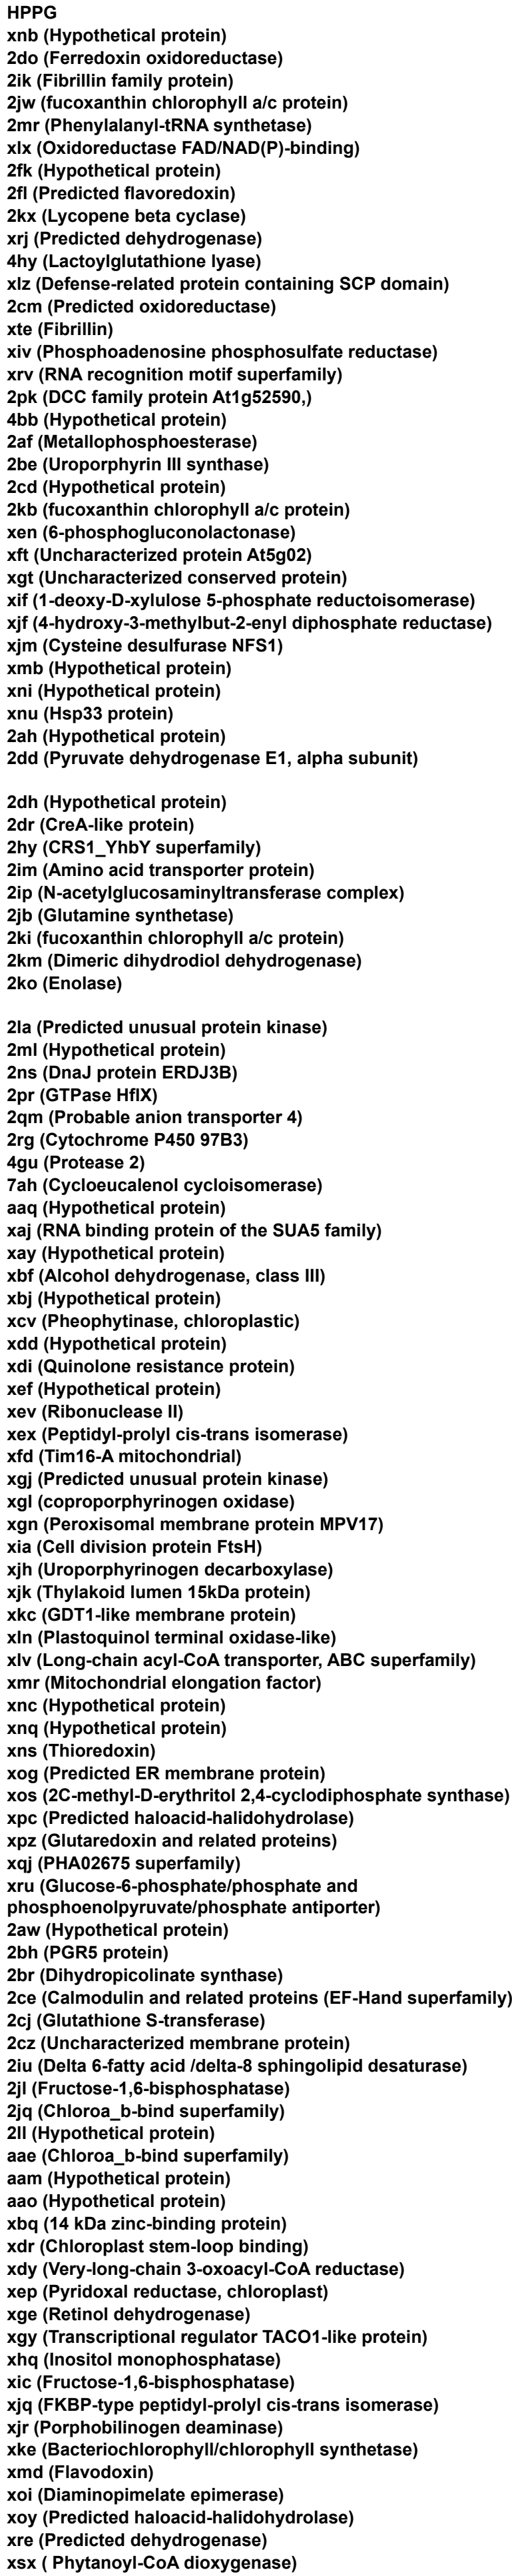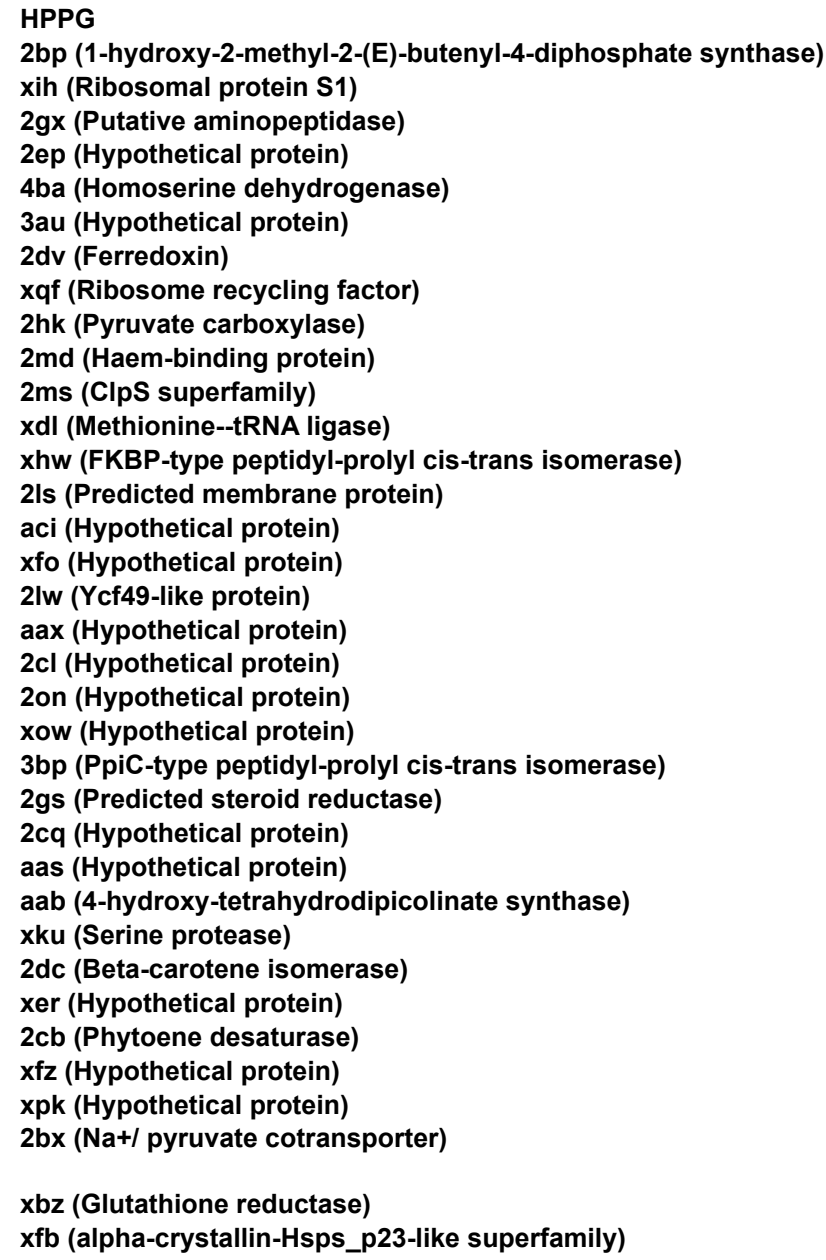

D

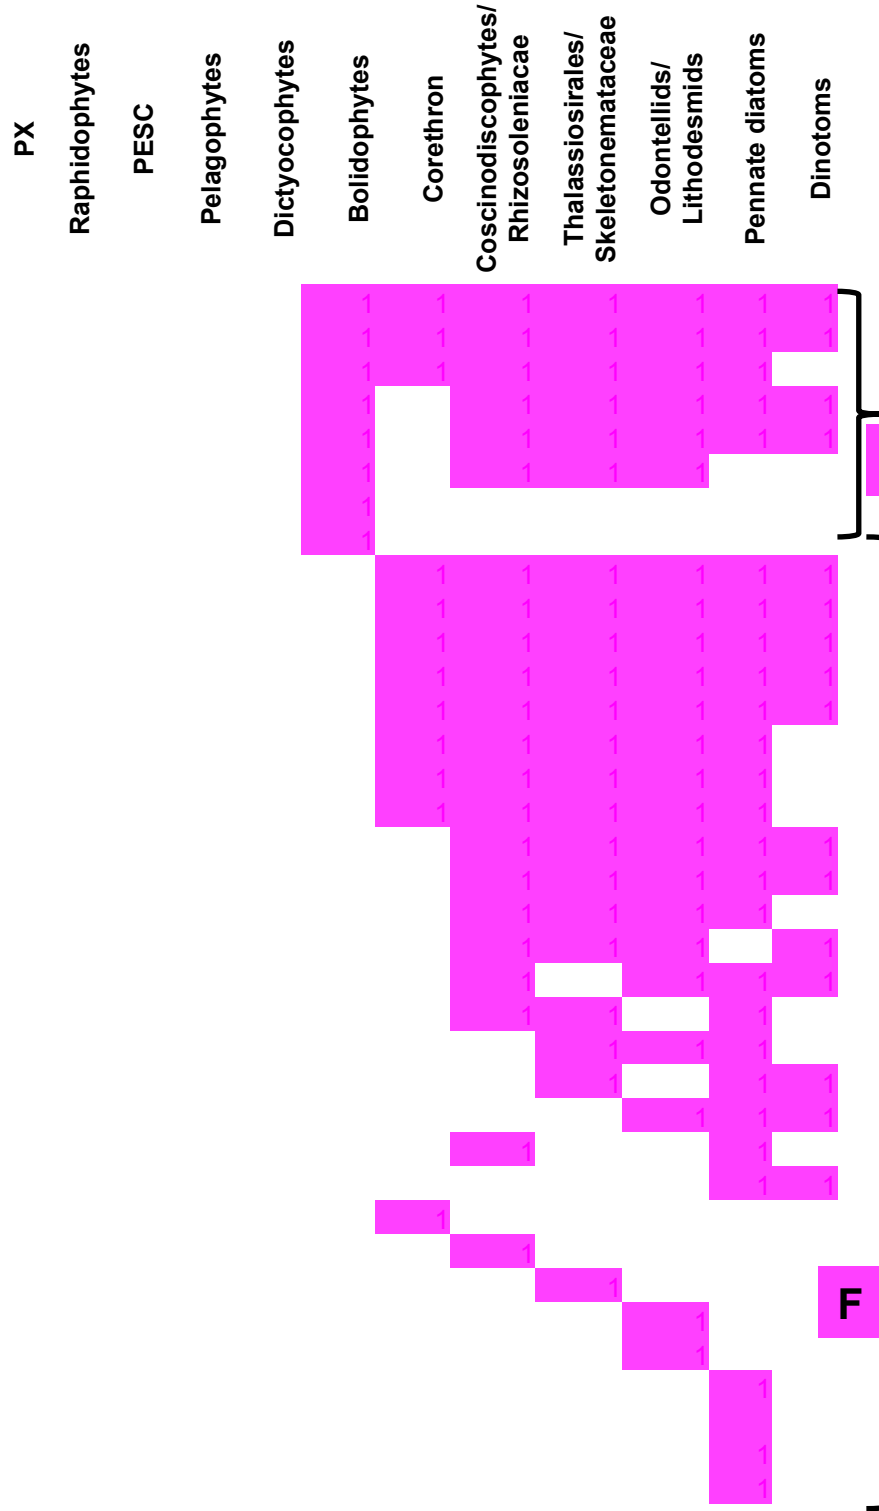

E

F
