# Supplementary material for: Chimeric origins of ochrophytes and haptophytes revealed through an ancient plastid proteome
Source: eLife journal article supplement (doi:10.7554/elife.23717), 2017-05-12

**Fig. 8- figure supplement 3. Internal evolutionary affinities of haptophyte plastid-targeted proteins incorporated into ancestral ochrophyte HPPGs.** This figure profiles the evolutionary origins of haptophyte plastid-targeted proteins incorporated into ancestral ochrophyte HPPGs by BLAST top hit analysis. Separate values are provided for query sequences from each of the three haptophyte sub-categories (pavlovophytes, prymnesiophytes, isochrysidales) considered within the analysis. Only sequences for which a consistent origin could be identified by both BLAST top hit and single-gene tree analysis are included. For each haptophyte lineage > 50% of the sequences verified by combined analysis to be of a specific ochrophyte origin have either pelagophyte or dictyochophyte top hits.

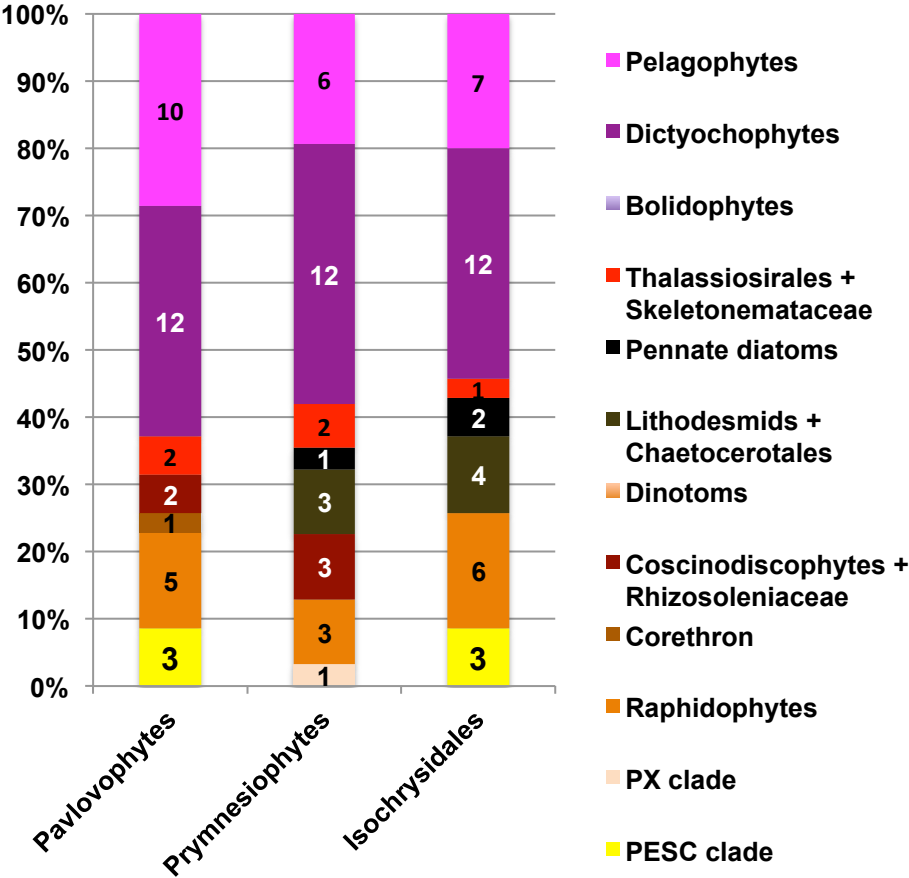

Supplement: supp [file elife_poa_e23717_Figure_8_Supplement_3.pdf › elife_poa_e23717_Figure_8_Supplement_3.pdf]
