# Supplementary material for: Chimeric origins of ochrophytes and haptophytes revealed through an ancient plastid proteome
Source: eLife journal article supplement (doi:10.7554/elife.23717), 2017-05-12

**Fig. 8- figure supplement 5. Earliest possible origin points of uniquely conserved sites in haptophyte plastid-targeted proteins.** This figure shows the total number of residues that are uniquely shared between a 37 proteins that have clearly been transferred between the ochrophytes and haptophytes, and are of subsequently entirely vertical origin, assuming the earliest possible origin point for each residue (i.e. in which gapped or missing positions were interpreted as identities). 87/ 128 of the uniquely shared residues inferred to originate within the ochrophytes were congruent to gene transfers between the haptophytes and pelagophyte and dictyochophyte clade; of these, slightly more than half (46) are inferred to have originated in a common ancestor of all hypogyristera and diatoms, consistent with the gene transfer having occurred from an ancestor of the pelagophytes and dictyochophytes into the haptophytes, rather than the converse.

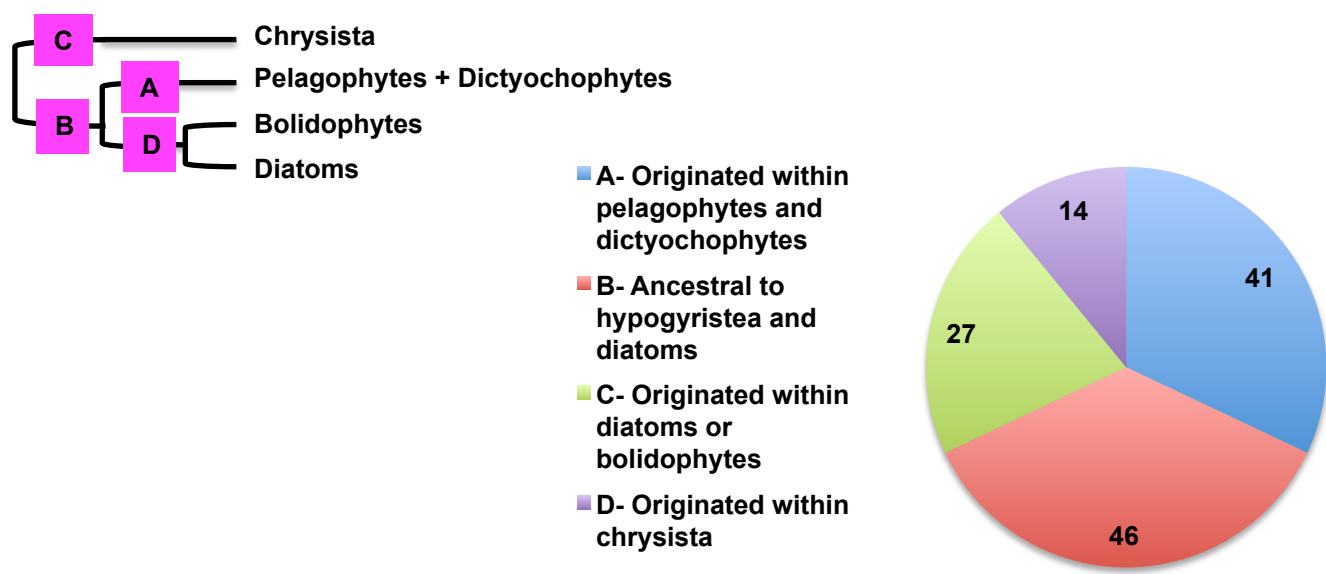

Supplement: supp [file elife_poa_e23717_Figure_8_Supplement_5.pdf › elife_poa_e23717_Figure_8_Supplement_5.pdf]
