# Supplementary material for: Chimeric origins of ochrophytes and haptophytes revealed through an ancient plastid proteome
Source: eLife journal article supplement (doi:10.7554/elife.23717), 2017-05-12

**Fig. 8- figure supplement 6. Evolutionary origin of ancestral haptophyte genes.** This figure shows the most likely evolutionary origin assigned by BLAST top hit analysis to the 12728 conserved gene families inferred to have been present in the last common haptophyte ancestor.

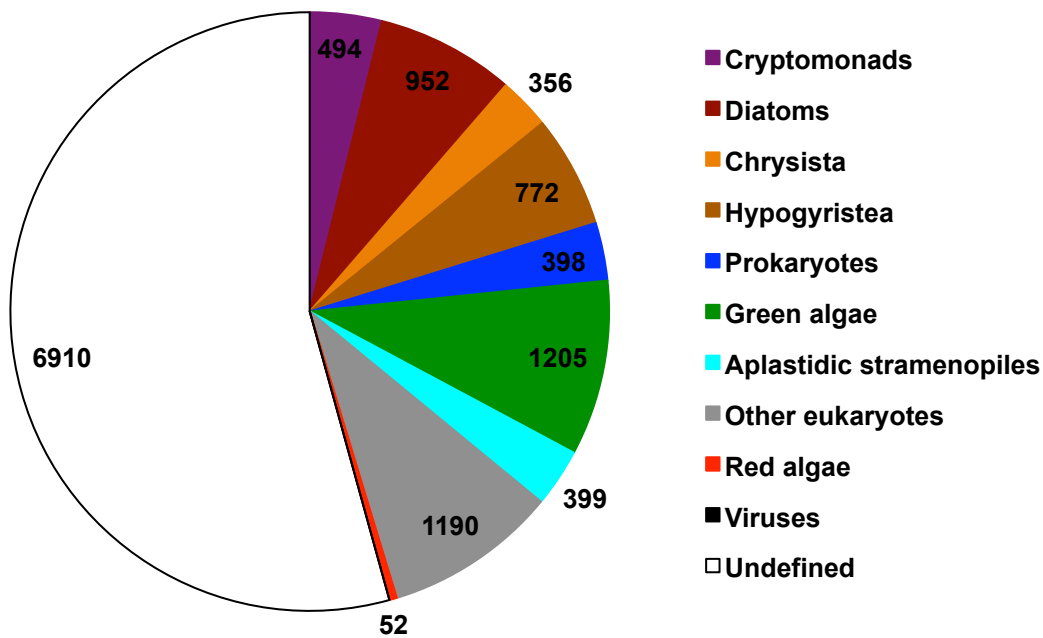

Supplement: supp [file elife_poa_e23717_Figure_8_Supplement_6.pdf › elife_poa_e23717_Figure_8_Supplement_6.pdf]
