# Supplementary material for: Chimeric origins of ochrophytes and haptophytes revealed through an ancient plastid proteome
Source: eLife journal article supplement (doi:10.7554/elife.23717), 2017-05-12
Supplement: supp [file elife_poa_e23717_Figure_9_Supplement_2.pdf › elife_poa_e23717_Figure_9_Supplement_2.pdf]

**Fig. 9- figure supplement 2. Fast site removal and clade deduction analysis of plastid genome trees. Panel A** shows the support values obtained for Bayesian + Jones trees inferred from modified versions of the taxon-rich plastid multigene alignment from which the 13 fastest-evolving site categories had been removed for four different branching relationships pertaining to the placements of haptophyte and hypogyristean sequences. The % of residues from the original alignment retained in each modified alignment are shown with grey bars. **Panel B** tabulates the support obtained for two different evolutionary relationships (haptophytes as a sister group to all cryptomonads, and as a sister group to all ochrophytes) in gene-rich (i) and taxon-rich (ii) alignments modified to remove all amino acids that occur at different frequencies in haptophytes to ochrophyte lineages, and modified to remove individual or pairs of CASH lineages. “x” indicates that the topology in question was not obtained.

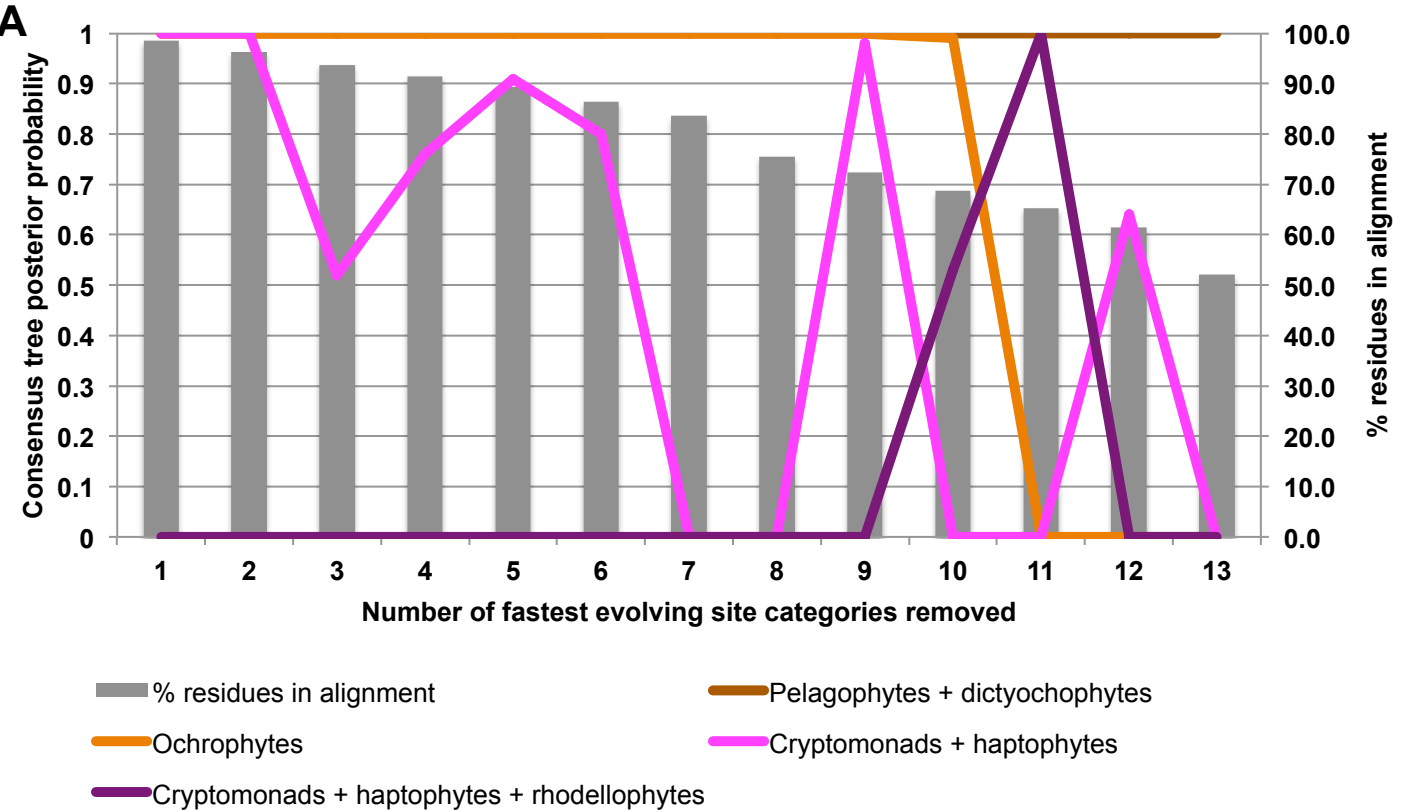

**B**

| Topology                   | Tree    | No glycines | No variant aa | No diatoms | No chrysista | No cryptomonads | No diatoms + chrysista | No diatoms + cryptomonads | No chrysista + cryptomonads |
|----------------------------|---------|-------------|---------------|------------|--------------|-----------------|------------------------|---------------------------|-----------------------------|
| i) Gene-rich alignment     |         |             |               |            |              |                 |                        |                           |                             |
| cryptomonads + haptophytes | MrBayes | 1           | 1             | 1          | 1            | x               | x                      | x                         | x                           |
| cryptomonads + haptophytes | RAXML   | 95          | 97            | 98         | 62           | x               | 30                     | x                         | x                           |
| haptophytes + ochrophytes  | MrBayes | x           | x             | x          | x            | 1               | x                      | 1                         | 1                           |
| haptophytes + ochrophytes  | RAXML   | x           | x             | x          | x            | 100             | x                      | 100                       | 100                         |
| ii) Taxon-rich alignment   |         |             |               |            |              |                 |                        |                           |                             |
| cryptomonads + haptophytes | MrBayes | 1           | 0.84          | 1          | 1            | x               | x                      | x                         | x                           |
| cryptomonads + haptophytes | RAXML   | 35          | x             | x          | x            | x               | x                      | x                         | x                           |
| haptophytes + ochrophytes  | MrBayes | x           | x             | x          | x            | 1               | 1                      | 1                         | 1                           |
| haptophytes + ochrophytes  | RAXML   | x           | x             | 43         | 73           | 100             | 69                     | 100                       | 100                         |
