# Supplementary material for: Chimeric origins of ochrophytes and haptophytes revealed through an ancient plastid proteome
Source: eLife journal article supplement (doi:10.7554/elife.23717), 2017-05-12

**Fig. 10- figure supplement 1. Complex origins of different ancestral ochrophyte HPPGs** Panel A shows the evolutionary positions of lineages with histories of secondary endosymbiosis in trees of ancestral ochrophyte HPPGs verified by combined BLAST top hit and single-gene tree analysis to be either of red algal (i) or green algal origin (ii). In both cases, in more than half of the constituent trees, haptophyte and cryptomonad sequences resolve as closer relatives to the ochrophytes than the red or green algal evolutionary outgroup, either due to resolving in the ochrophyte HPPG or forming a specific sister-group to the ochrophyte lineages. **Panel B** plots the distribution of cryptomonads (i) and haptophytes (ii) in trees for different categories of ancestral ochrophyte HPPG of verified evolutionary origin. HPPGs of green algal origin more frequently show internal or sister positions for the cryptomonad sequences than all other categories of HPPG, and in more than 50% of cases resolve internal or sister positions for the haptophyte sequences. This might be consistent with a green algal contribution in the endosymbiotic ancestor of cryptomonad, haptophyte and ochrophyte plastids.

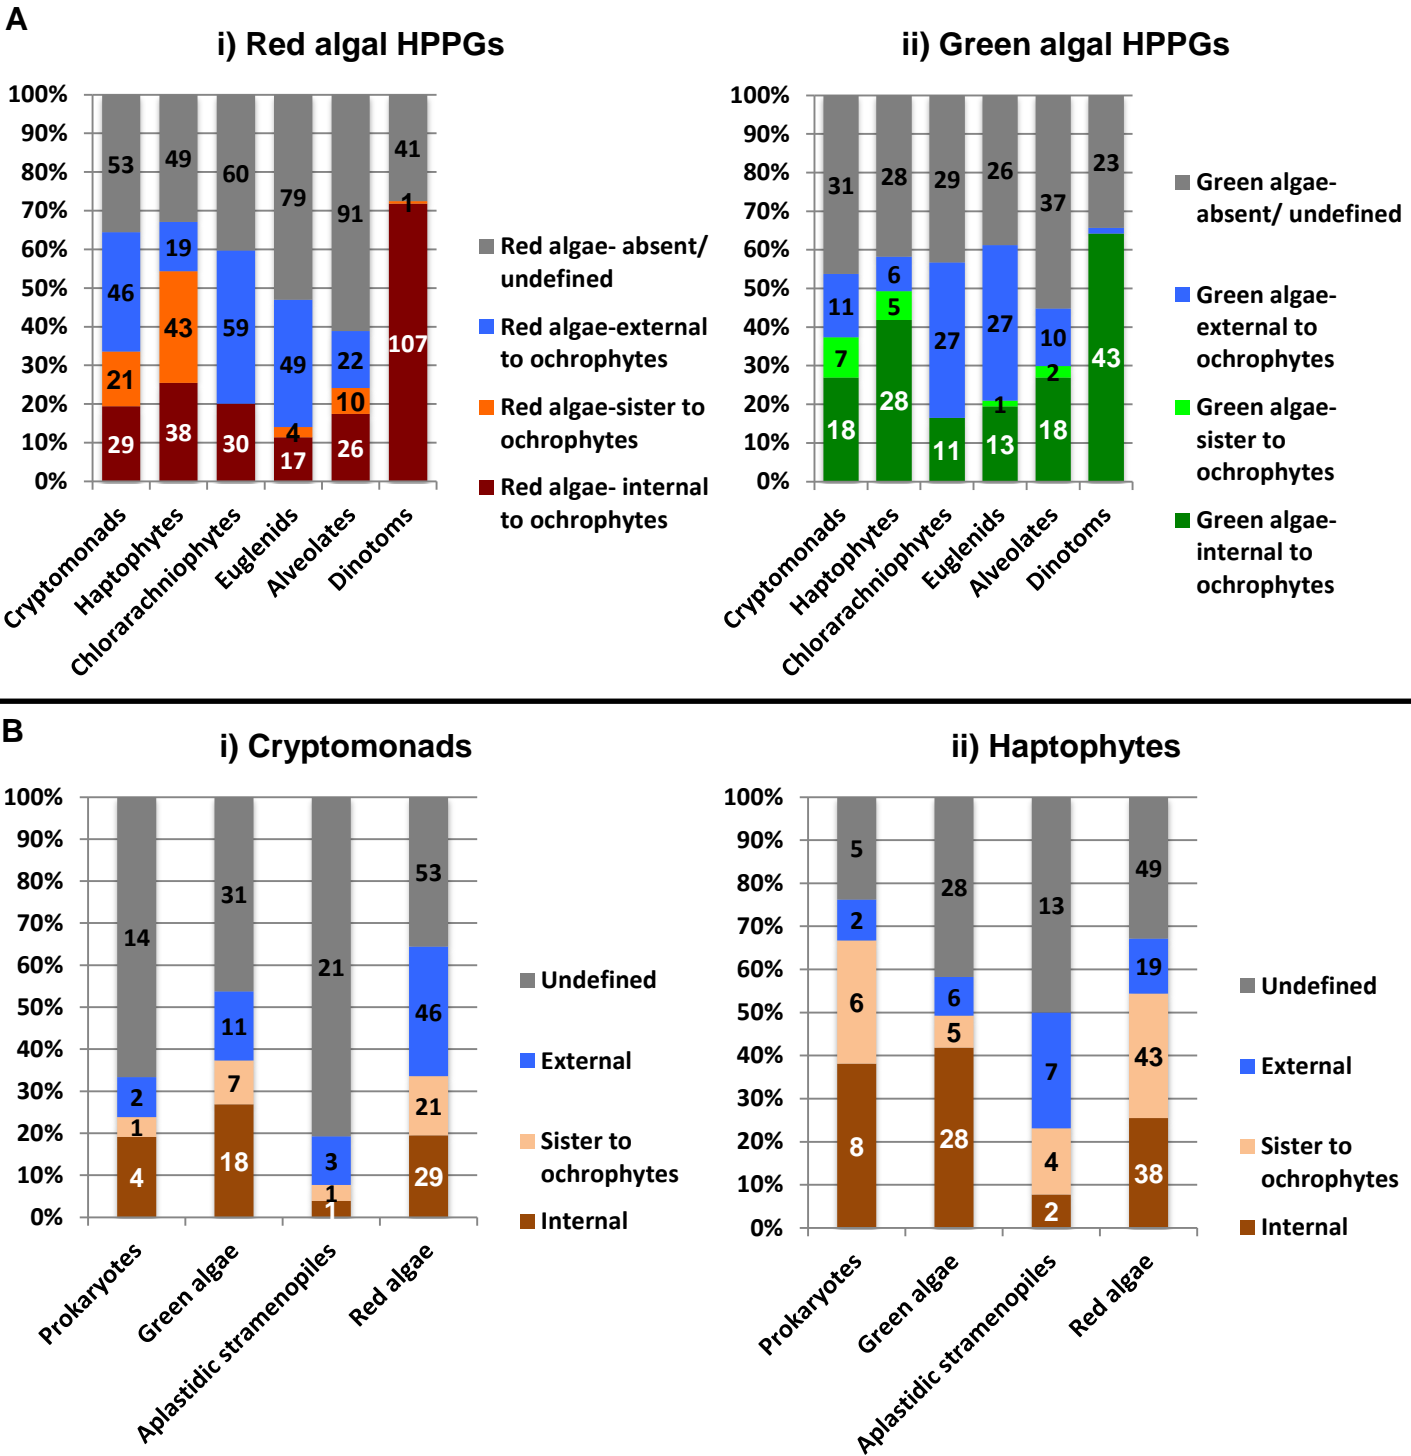

Supplement: supp [file elife_poa_e23717_Figure_10_Supplement_1.pdf › elife_poa_e23717_Figure_10_Supplement_1.pdf]
