# Supplementary figures and images for: Chimeric origins of ochrophytes and haptophytes revealed through an ancient plastid proteome
Source: eLife journal article supplement (doi:10.7554/elife.23717), 2017-05-12

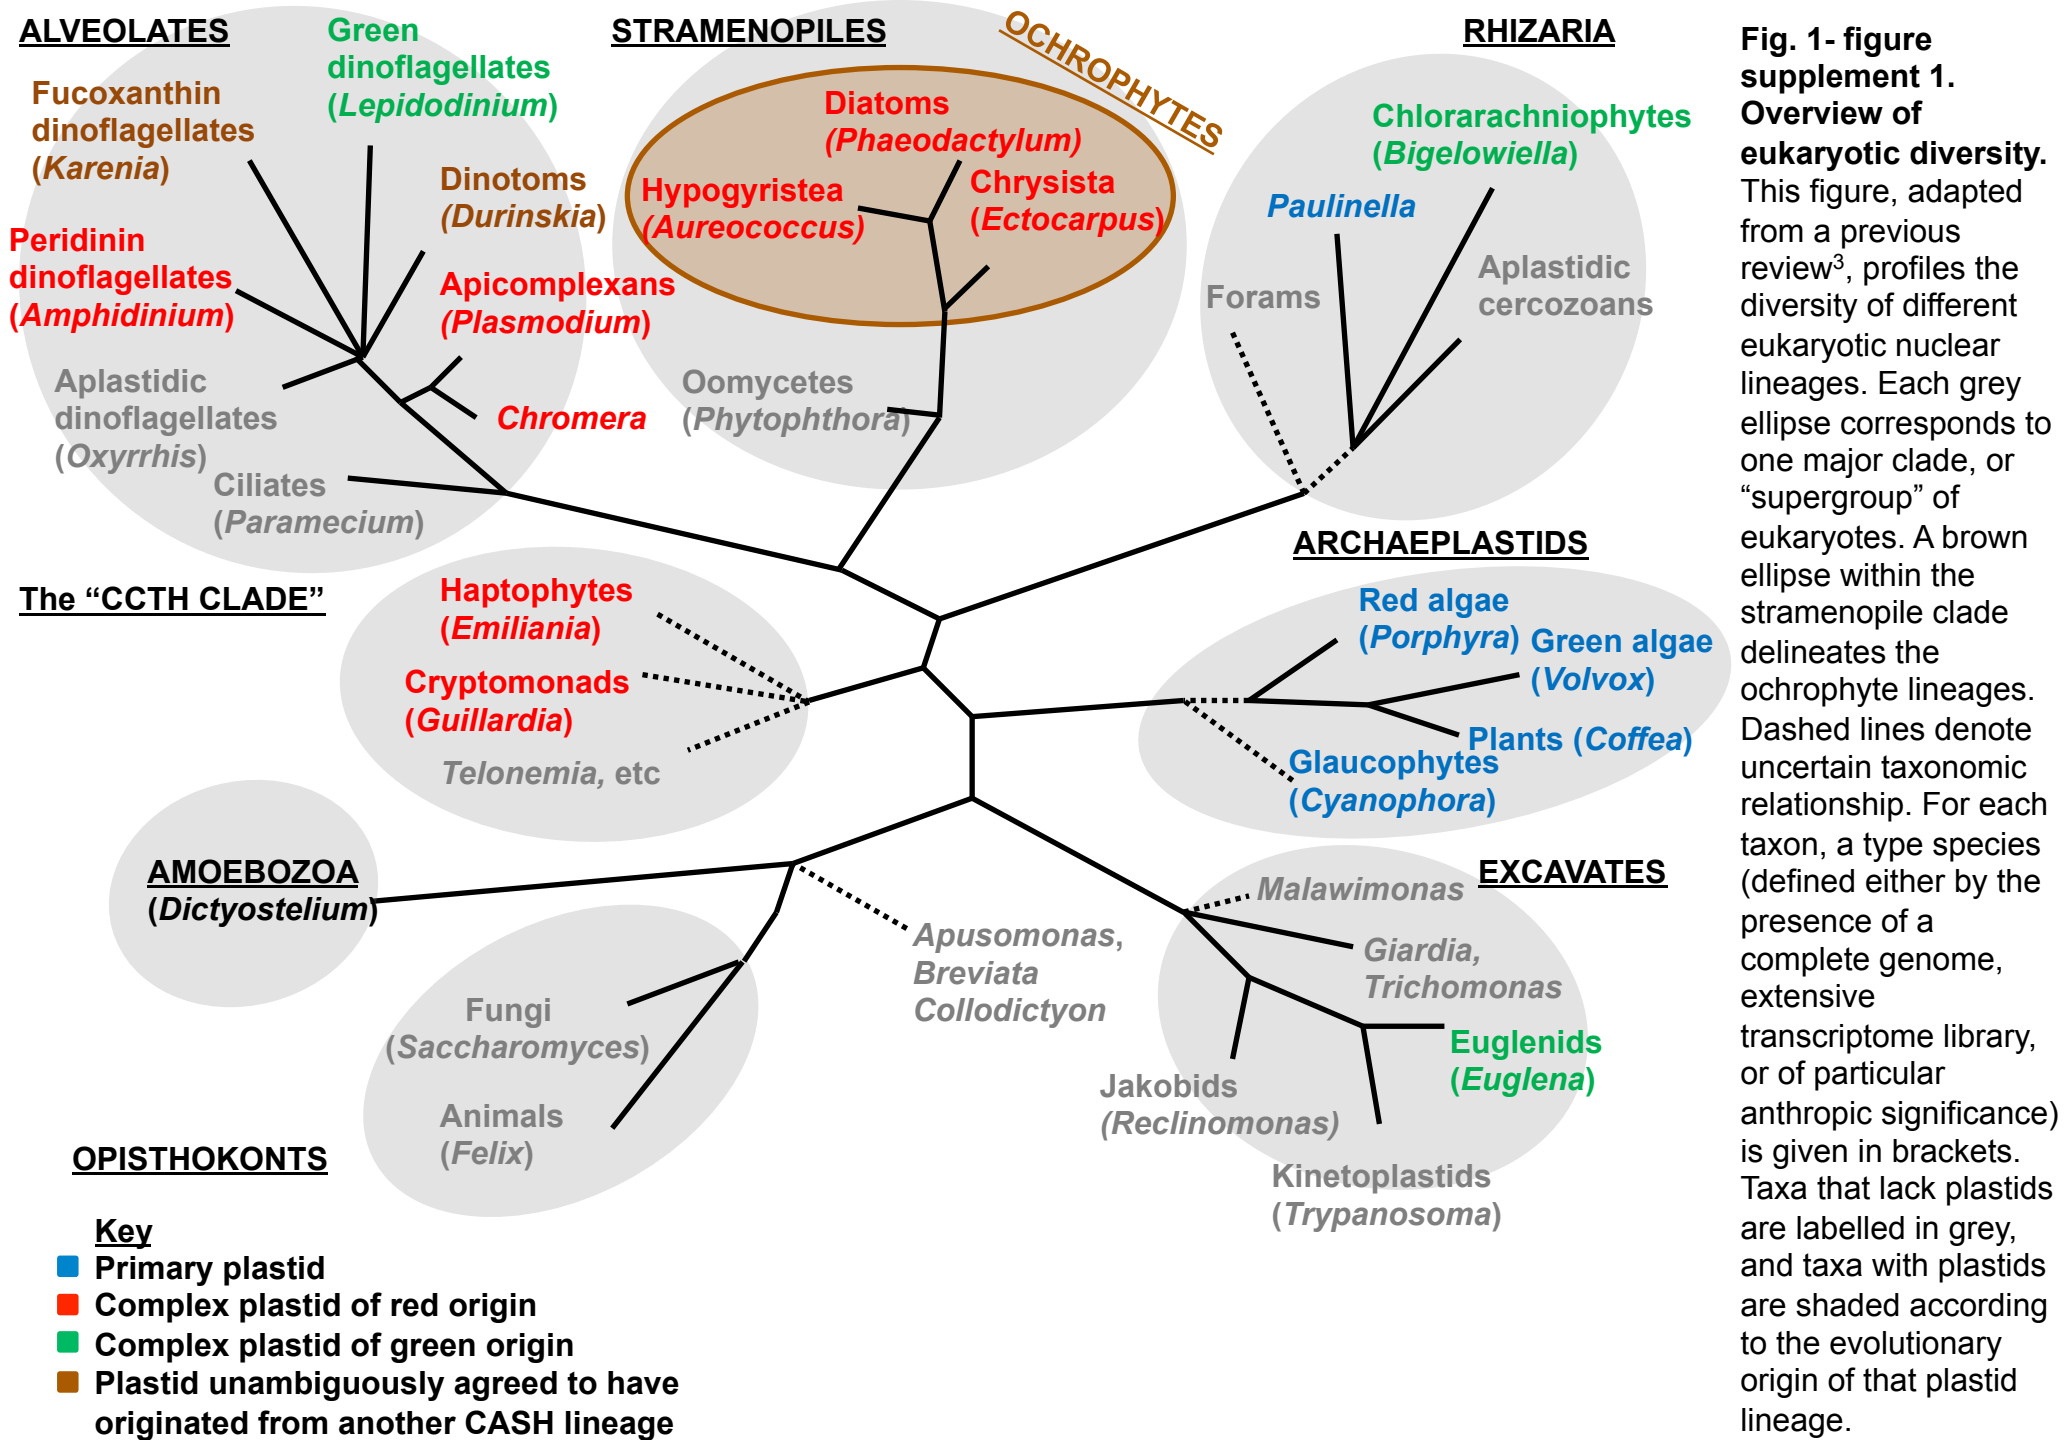

Supplement: supp [file elife_poa_e23717_Figure_1_Supplement_1.pdf › elife_poa_e23717_Figure_1_Supplement_1.pdf]

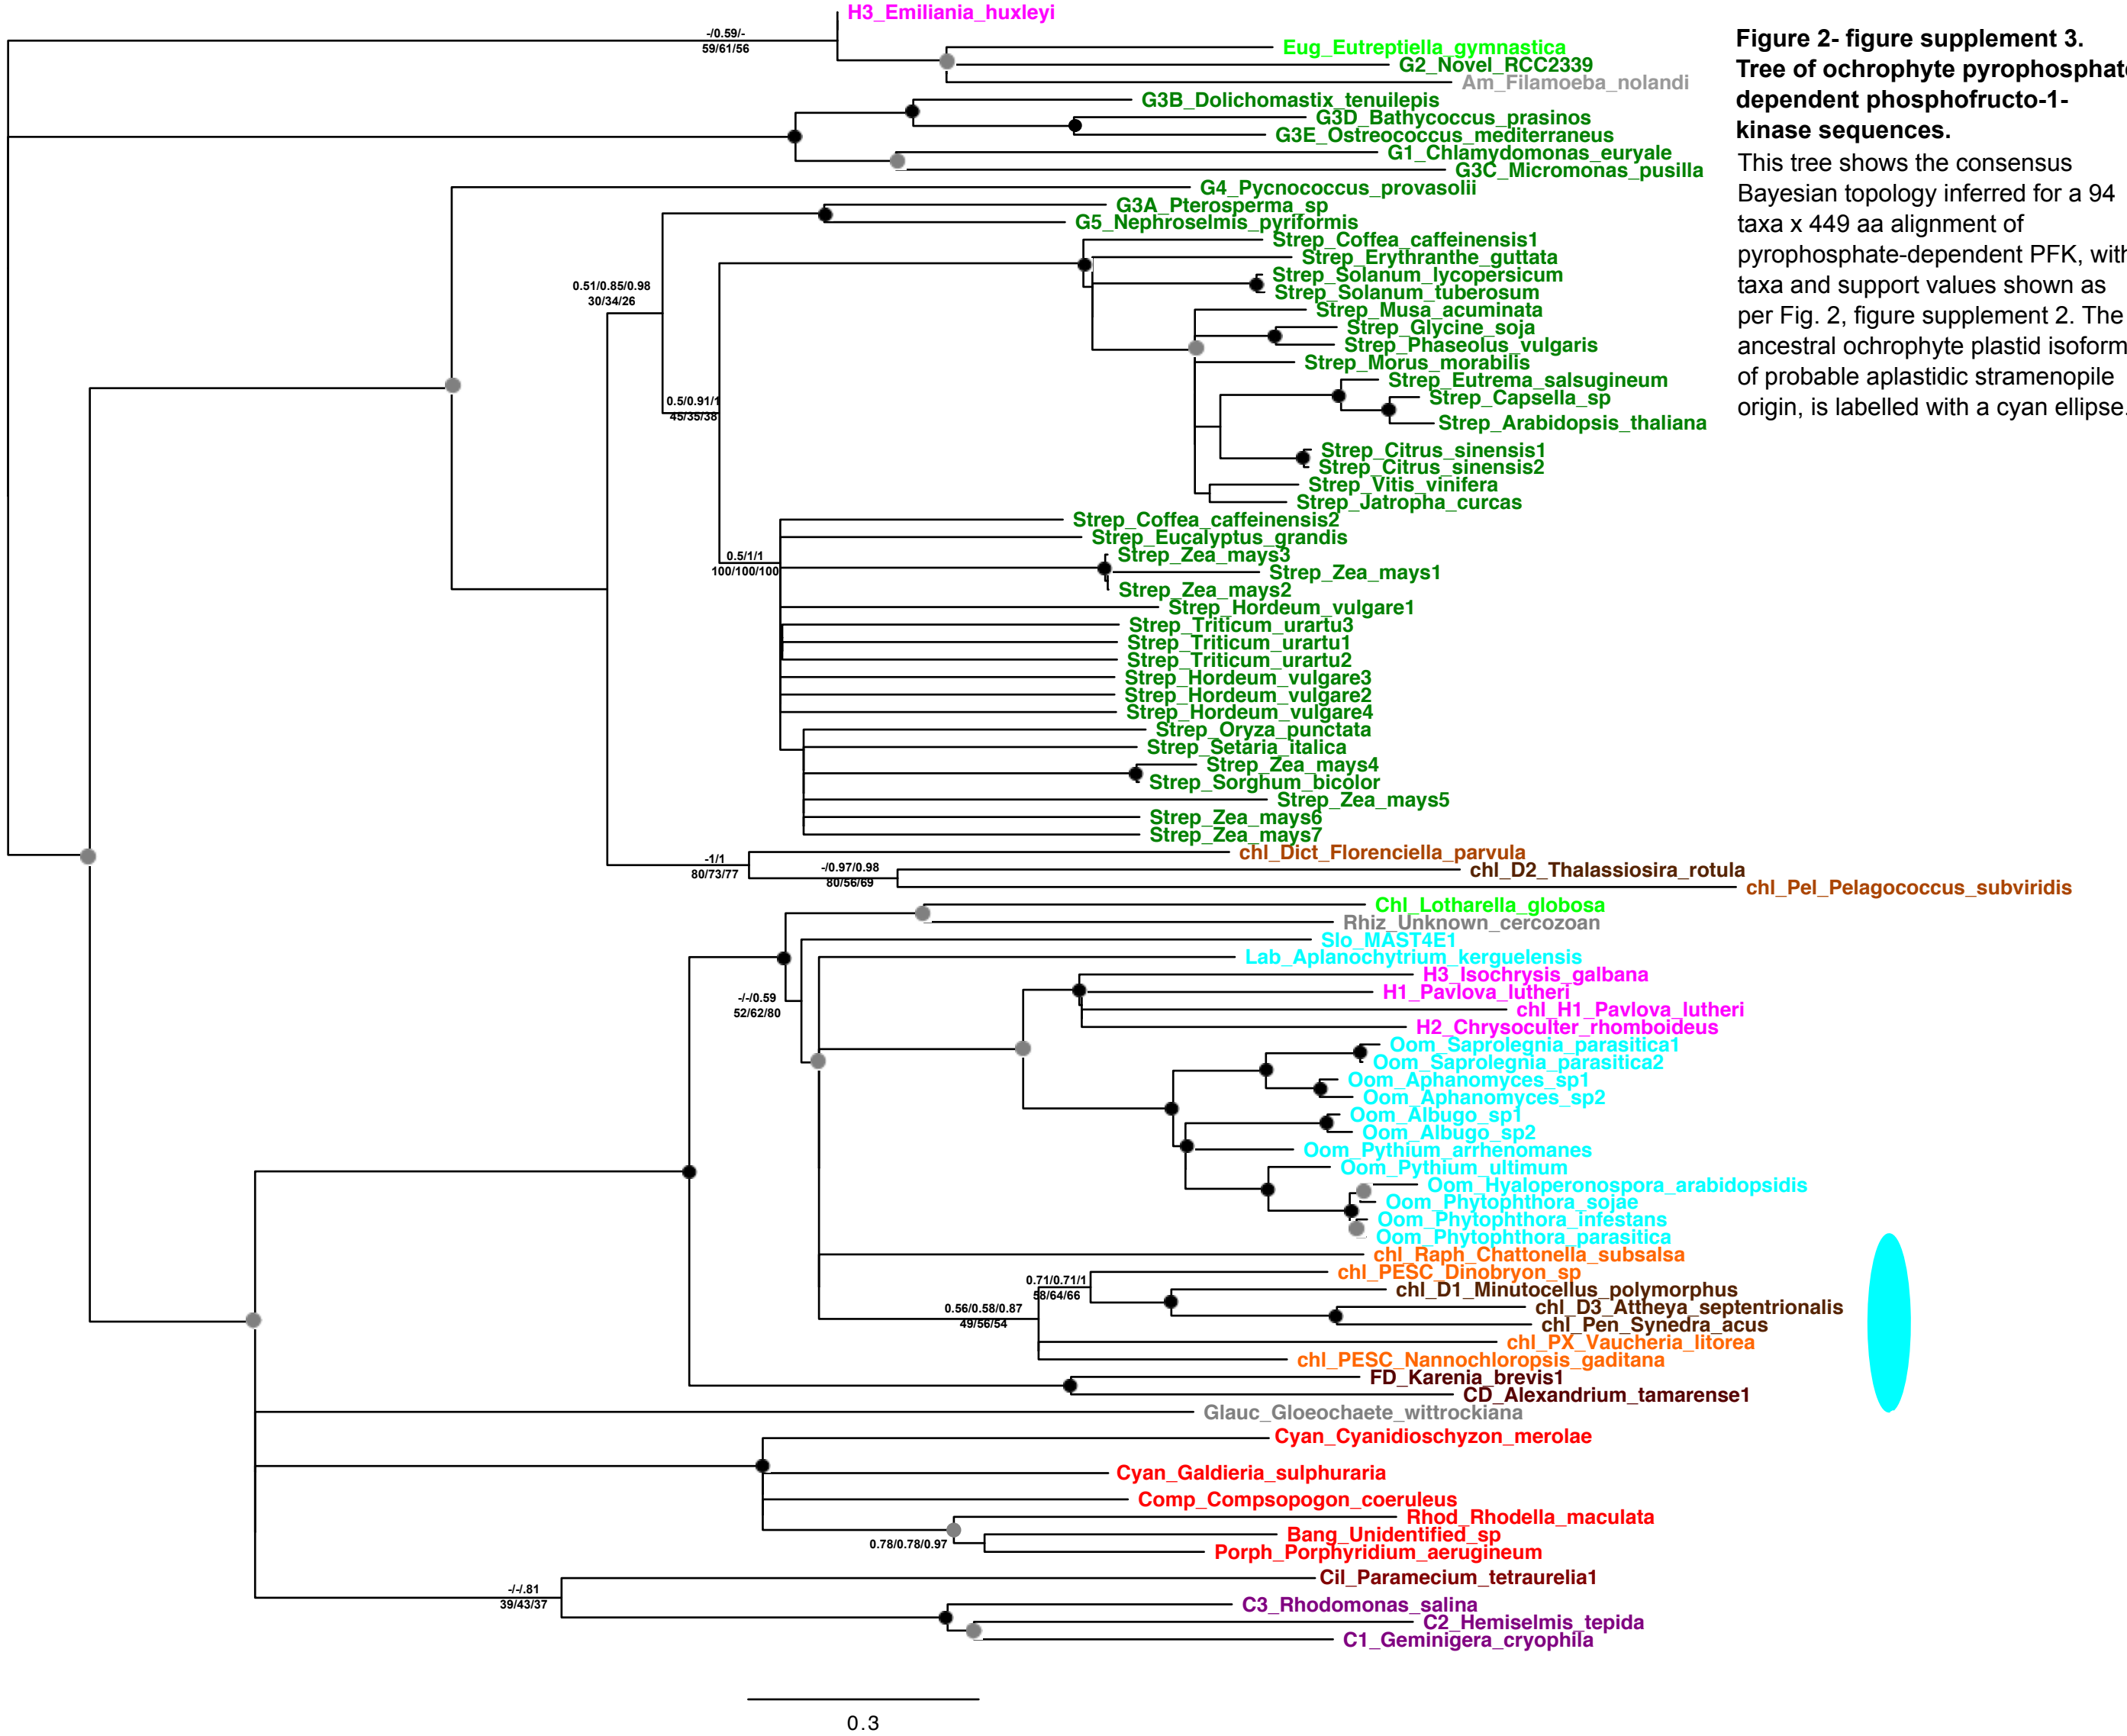

Supplement: supp [file elife_poa_e23717_Figure_2_Supplement_3.pdf › elife_poa_e23717_Figure_2_Supplement_3.pdf]

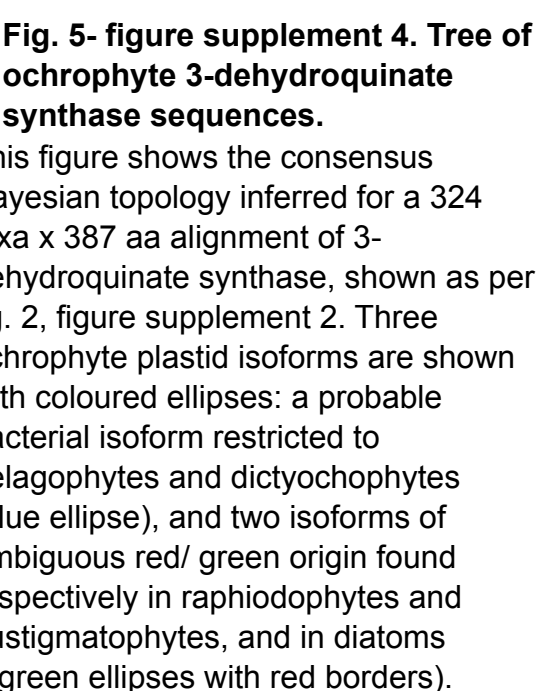

Supplement: supp [file elife_poa_e23717_Figure_5_Supplement_4.pdf › elife_poa_e23717_Figure_5_Supplement_4.pdf]

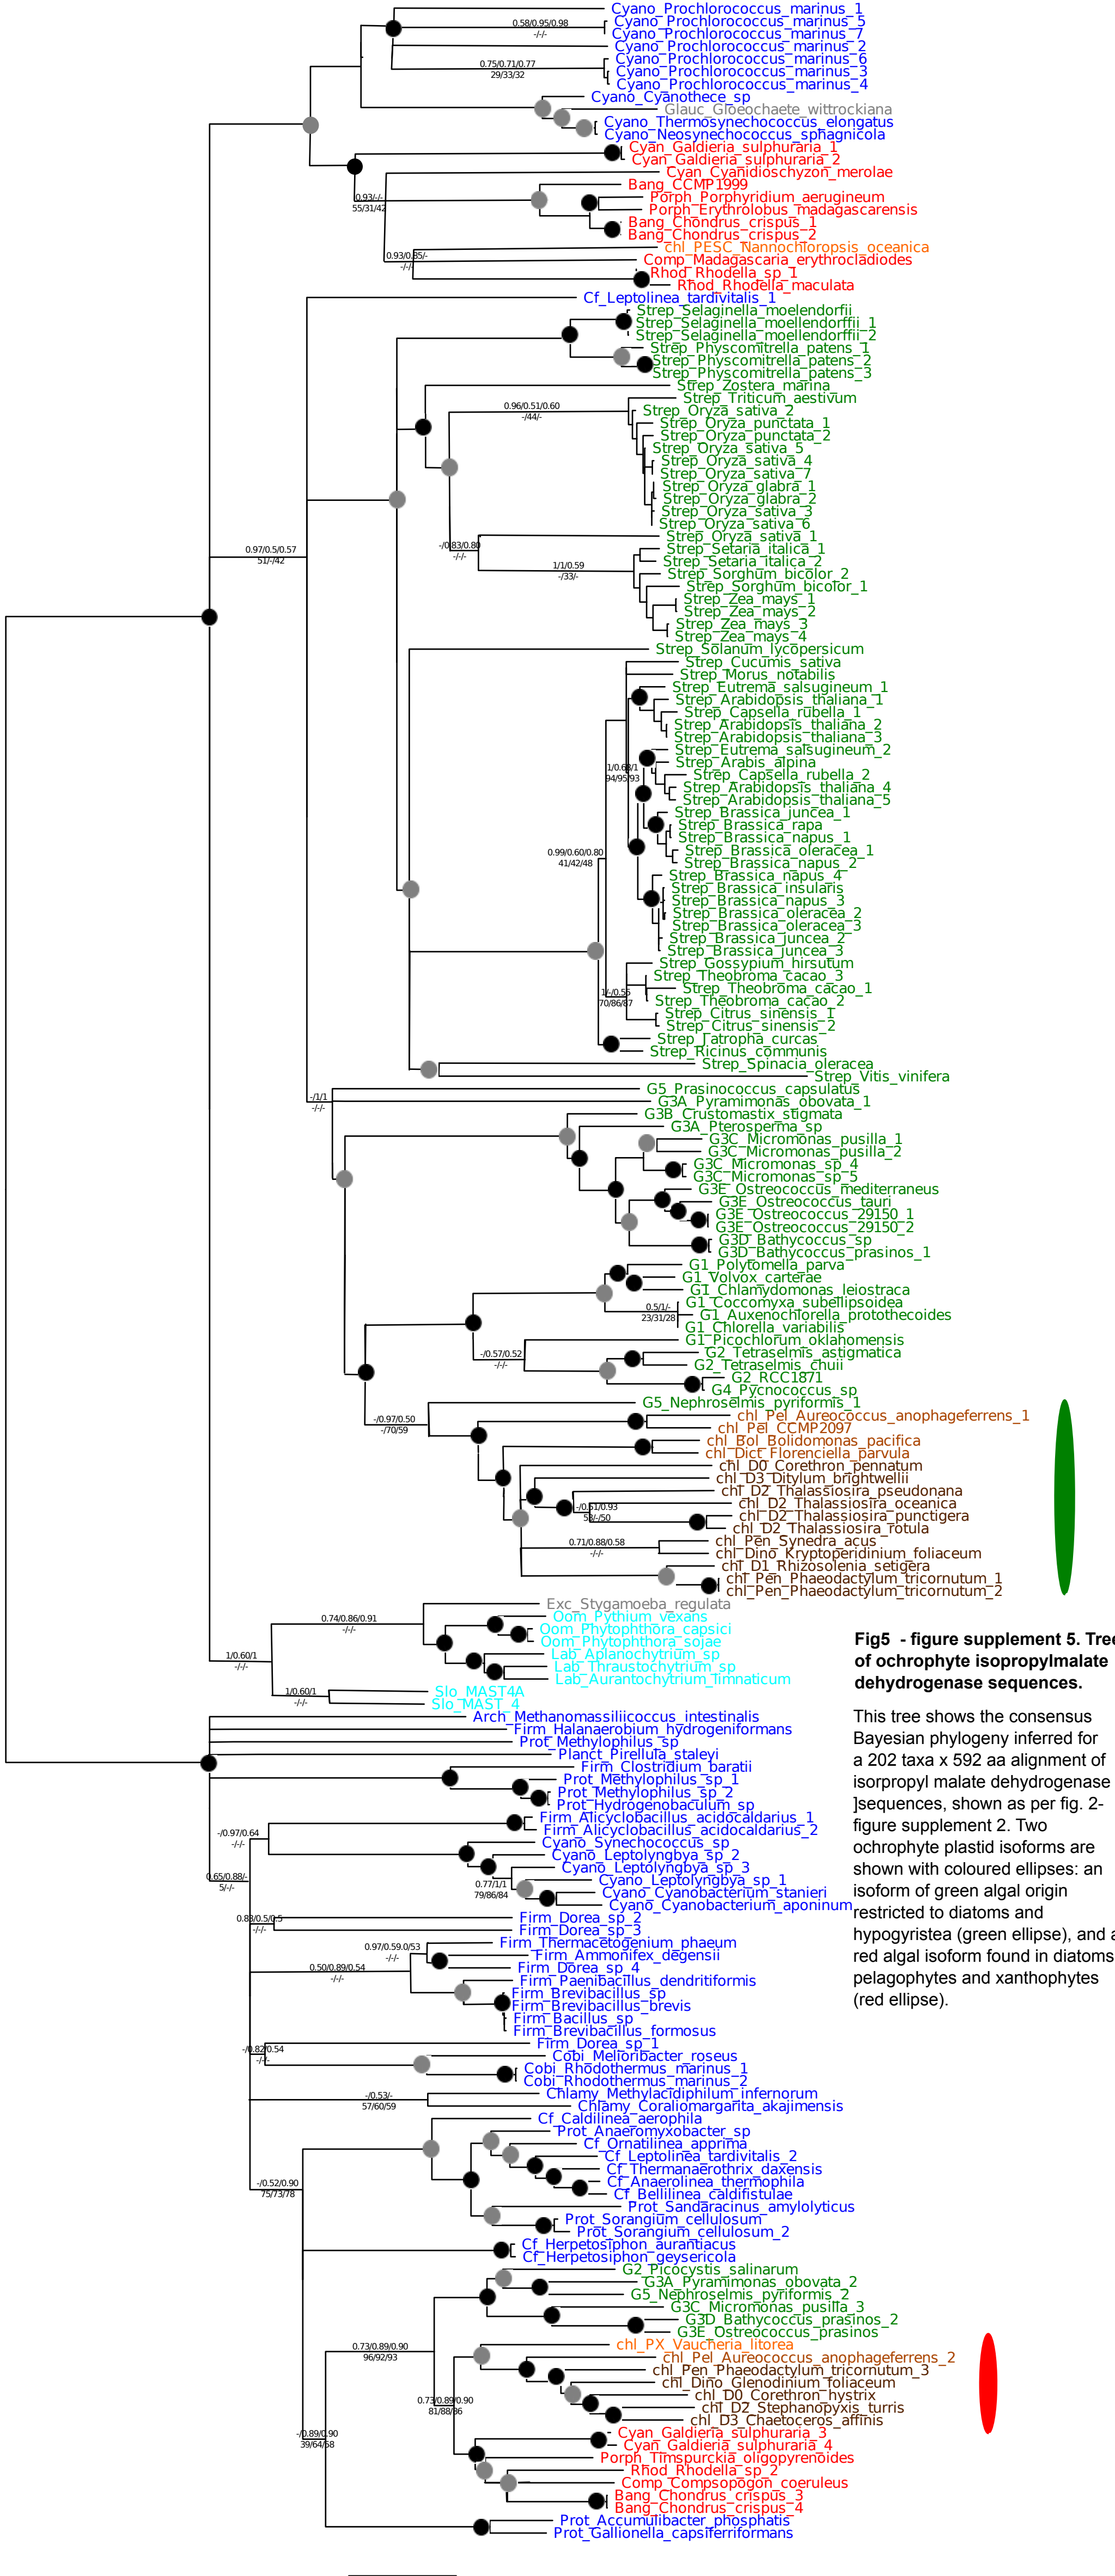

Supplement: supp [file elife_poa_e23717_Figure_5_Supplement_5.pdf › elife_poa_e23717_Figure_5_Supplement_5.pdf]

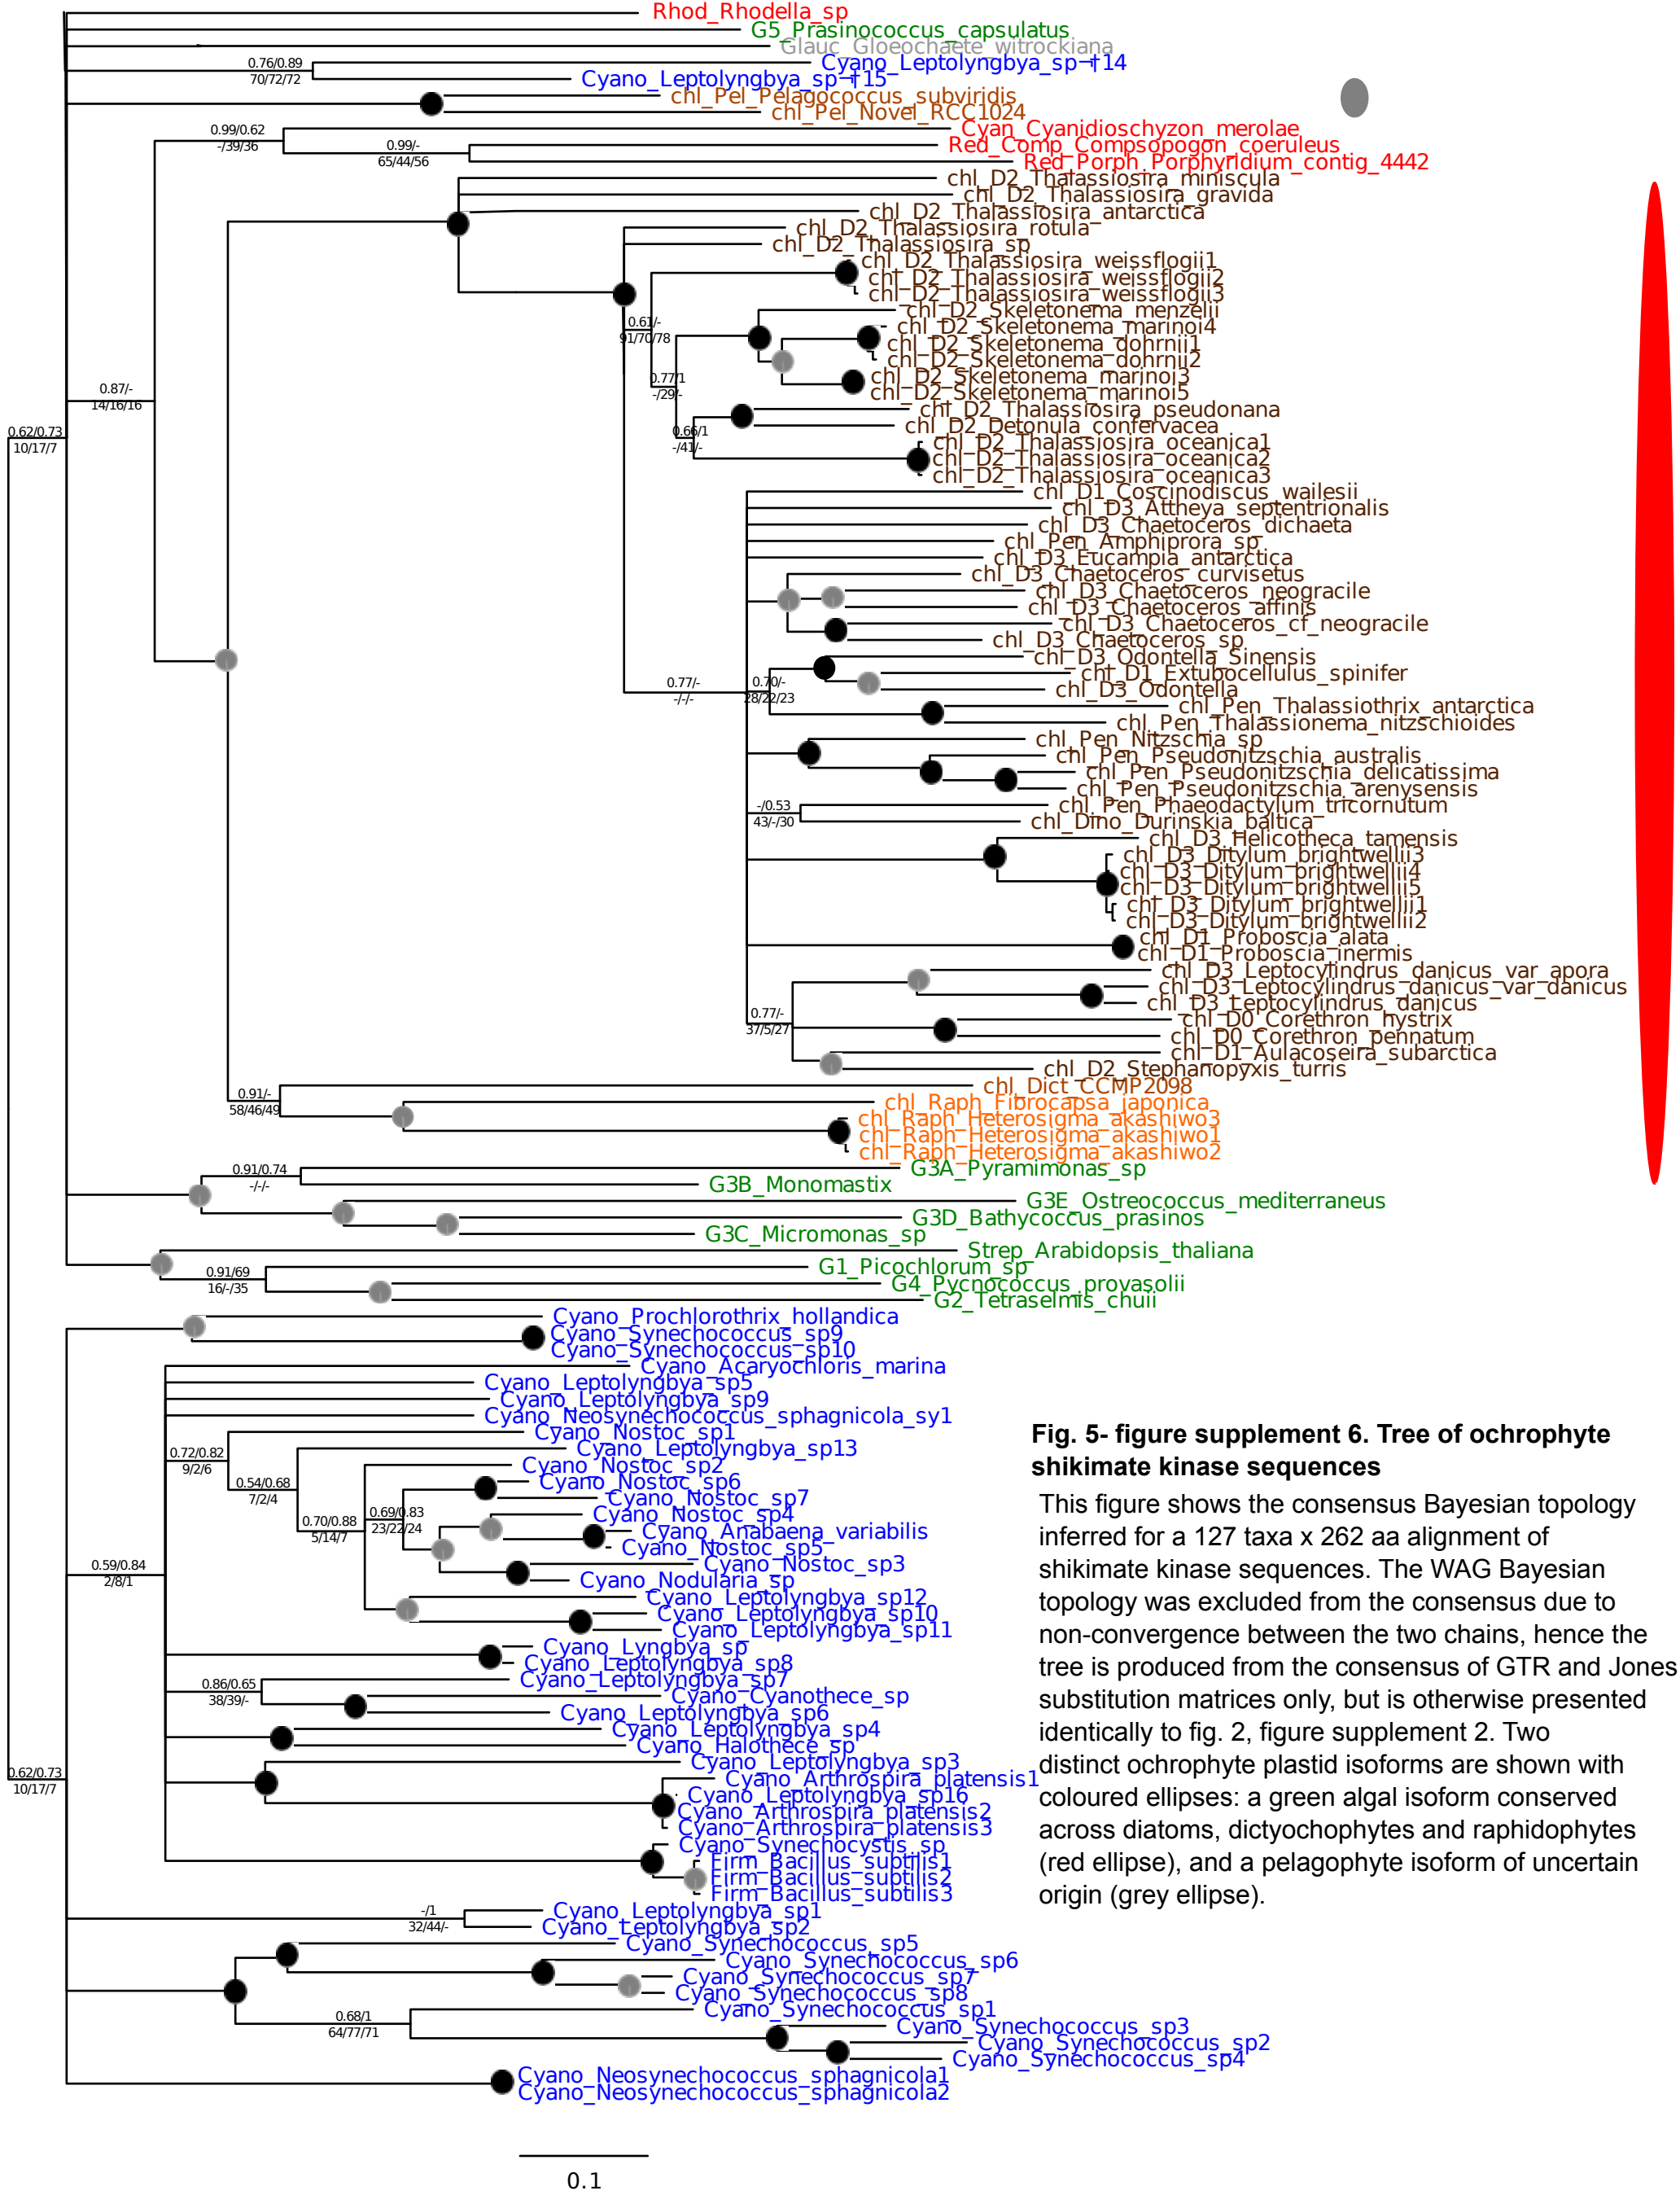

Supplement: supp [file elife_poa_e23717_Figure_5_Supplement_6.pdf › elife_poa_e23717_Figure_5_Supplement_6.pdf]

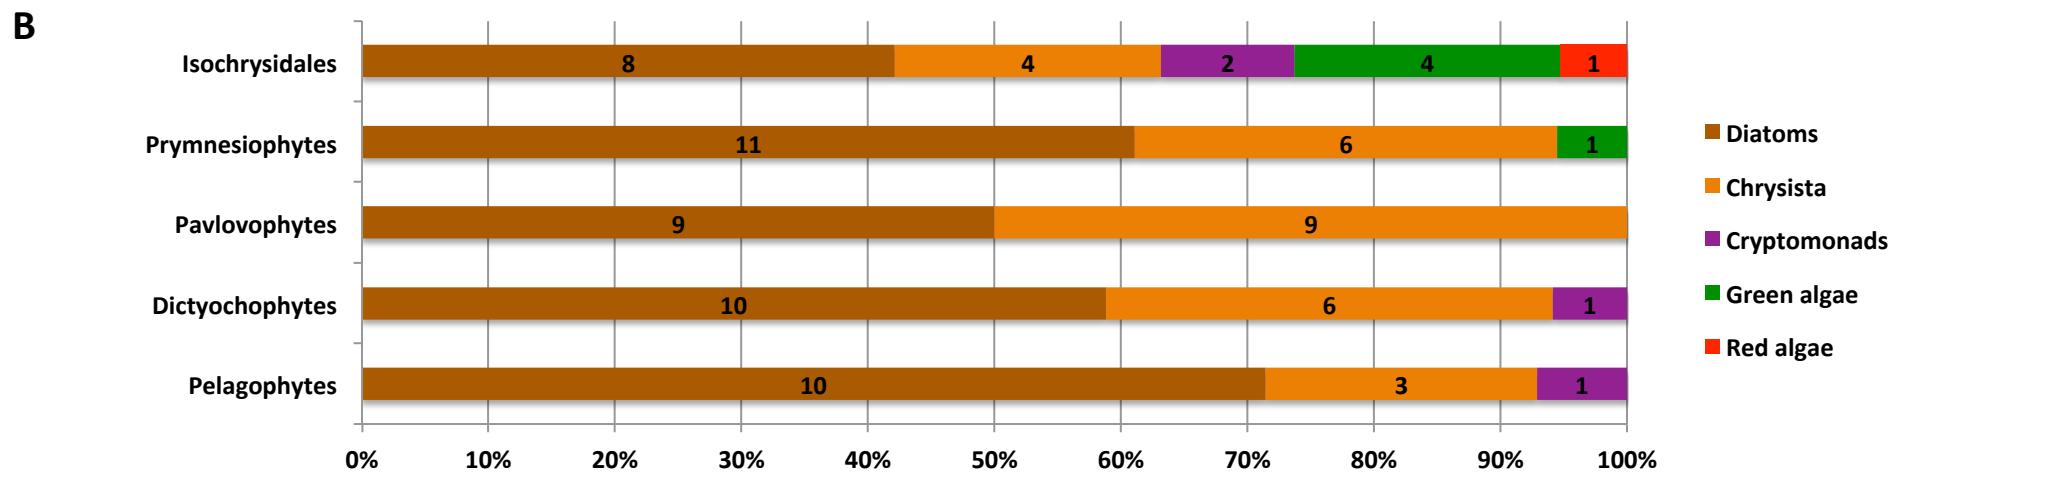

Supplement: supp [file elife_poa_e23717_Figure_8_Supplement_4.pdf › elife_poa_e23717_Figure_8_Supplement_4.pdf]
